# Supplementary material for: Complete stereodivergence in the synthesis of 2-amino-1,3-diols from allenes
Source: Royal Society of Chemistry journal article supplement (doi:10.1039/c4sc01214c), 2014-01-01
Supplement: c4sc01214c2.pdf [file c4sc01214c2.pdf]

Supporting Information NMR Spectra Part 2 for:

**Complete stereodivergence in the synthesis of 2-amino-1,3-diols from allenes**

Christopher S. Adams<sup>‡</sup>, R. David Grigg<sup>‡</sup> and Jennifer M. Schomaker<sup>\*</sup>

*Department of Chemistry, University of Wisconsin-Madison, 1101 University Avenue  
Madison, Wisconsin, 53706-1396*

|                                          |      |
|------------------------------------------|------|
| <b>Table of Contents</b>                 | S2-1 |
| <b>NMR Spectra for all new compounds</b> | S2-2 |



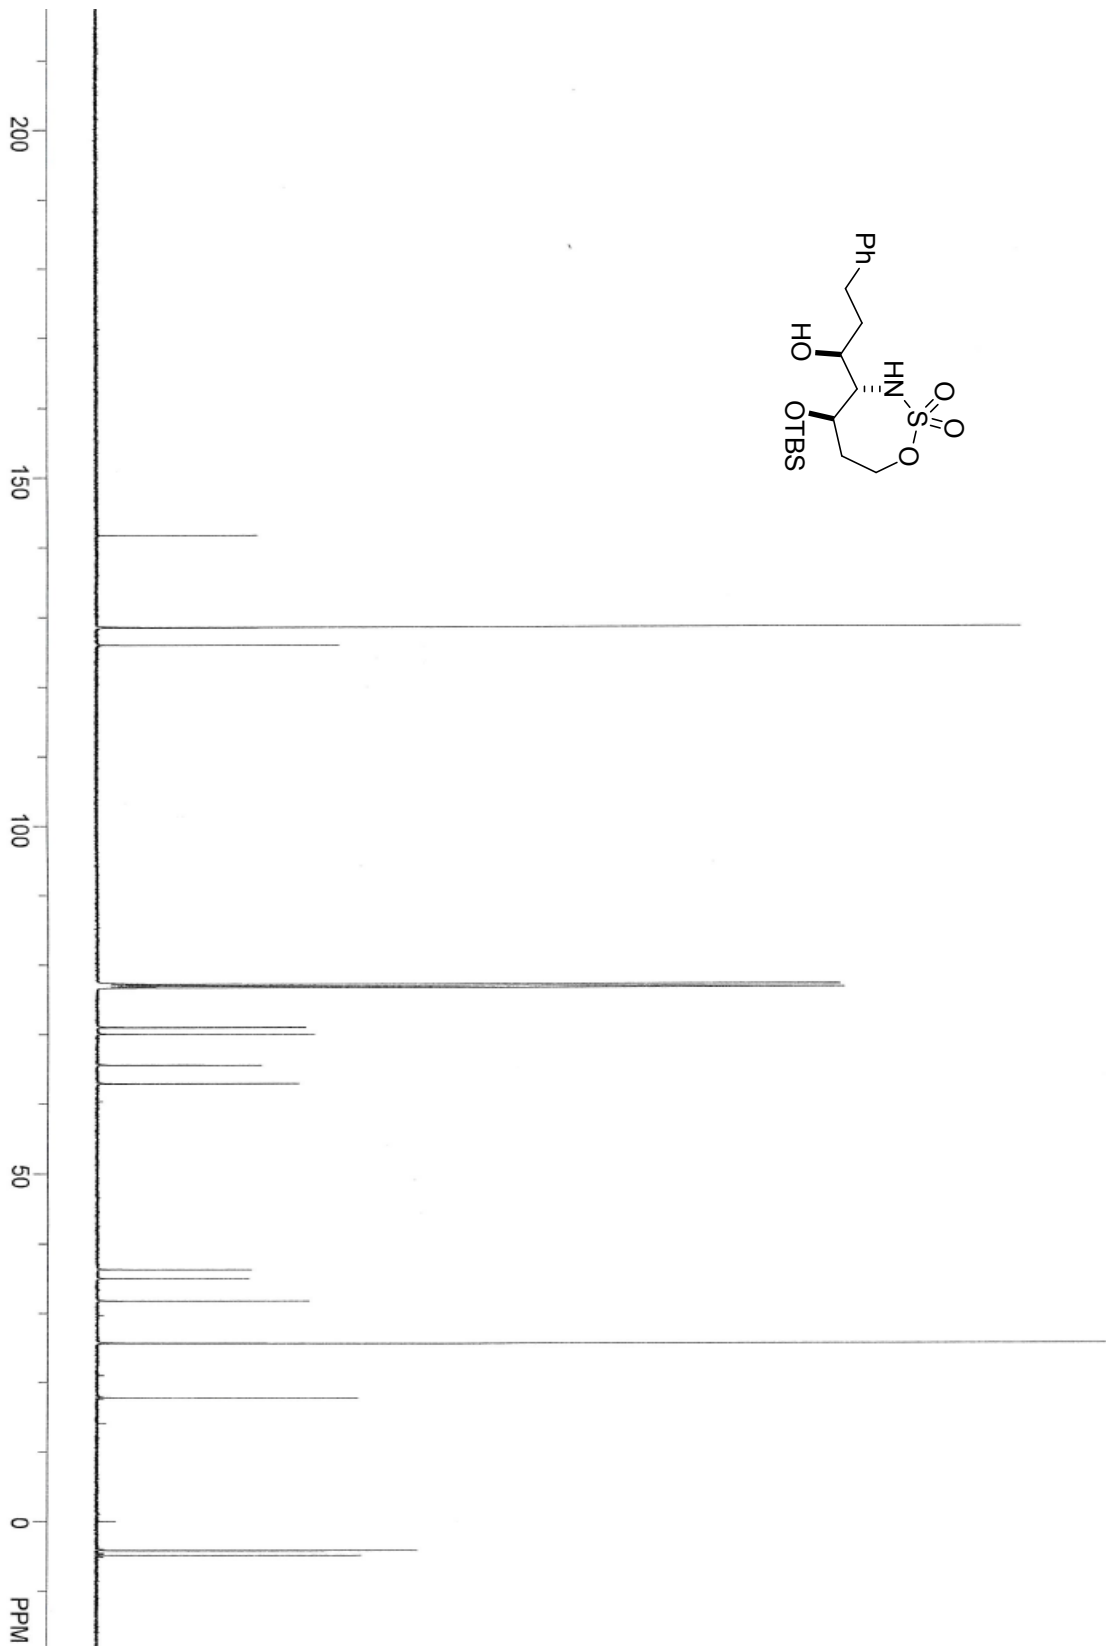



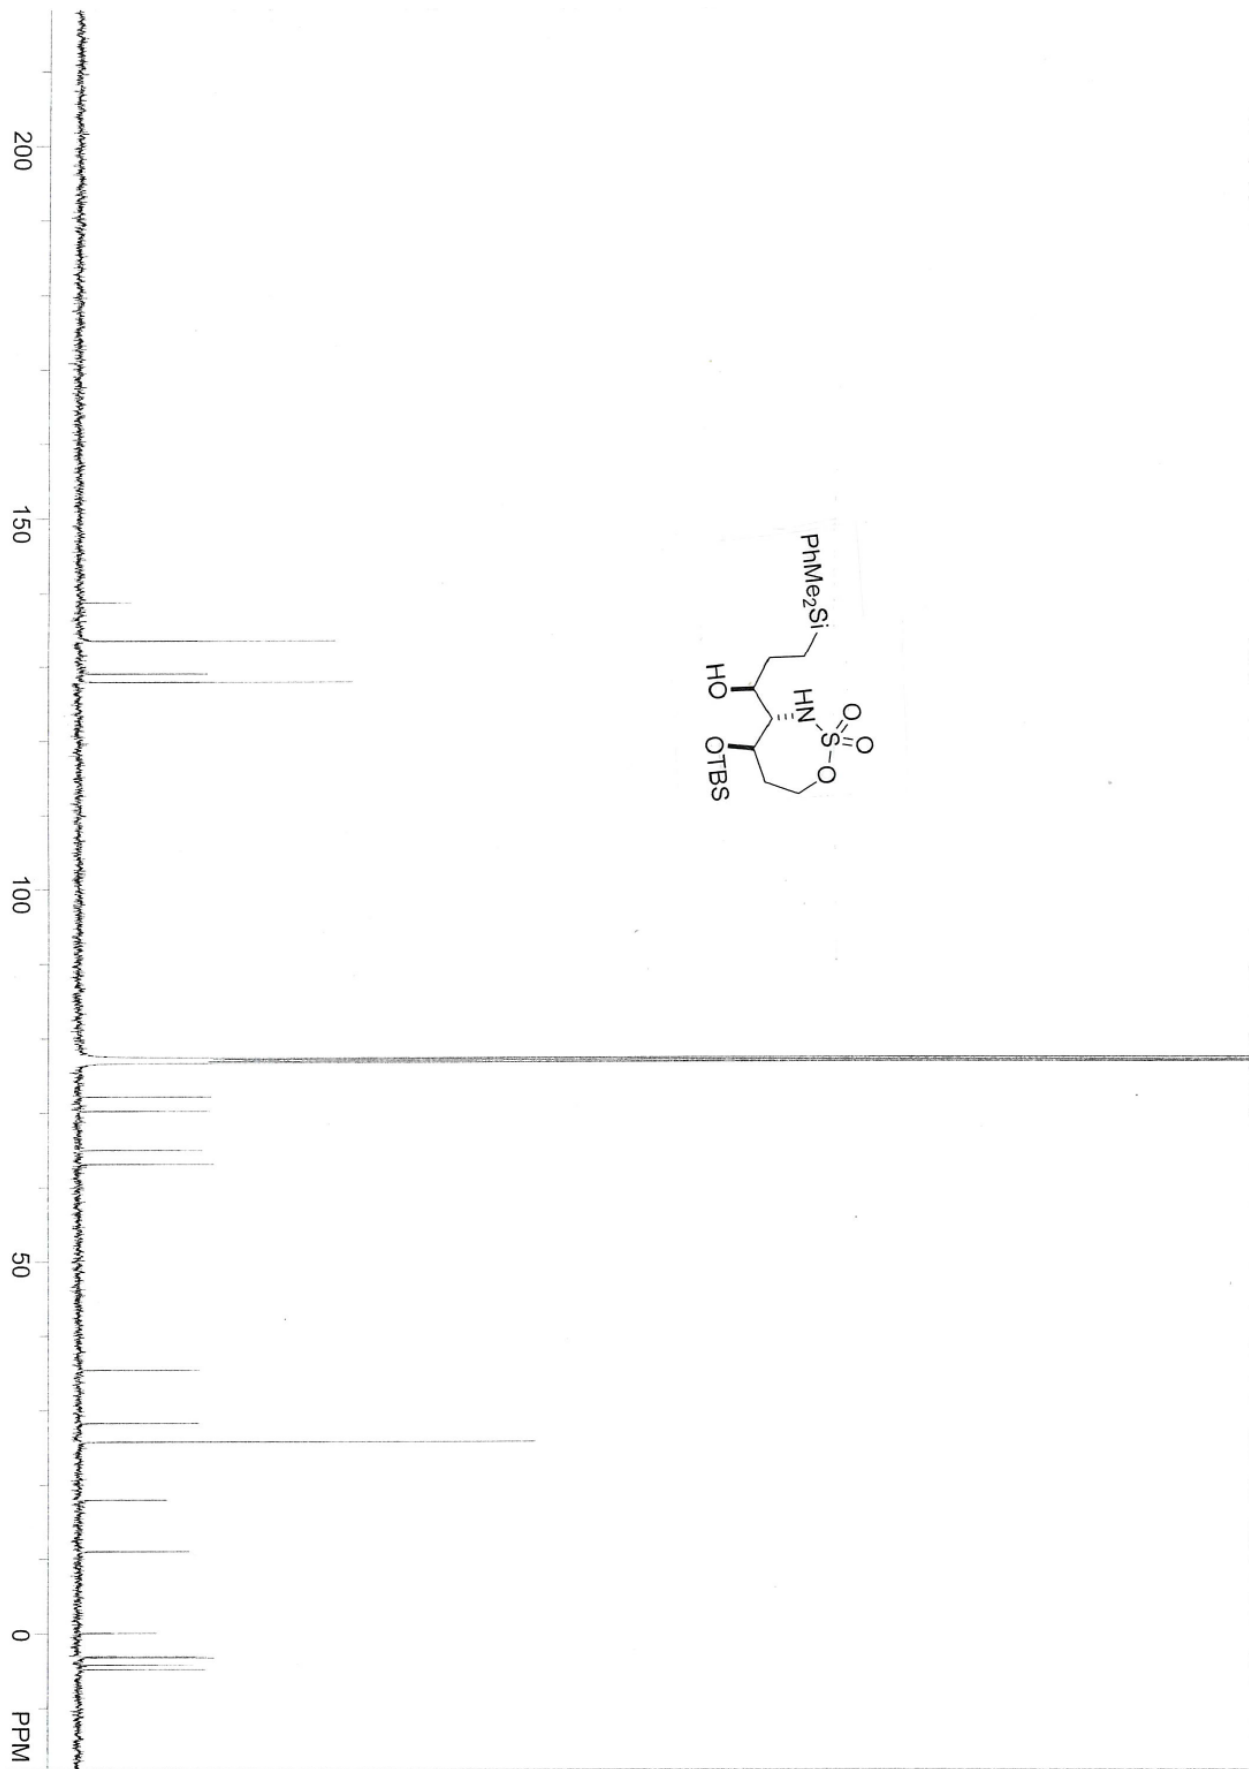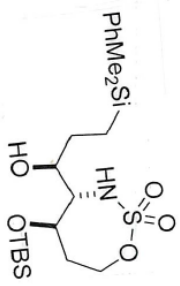

**Compound 40.**

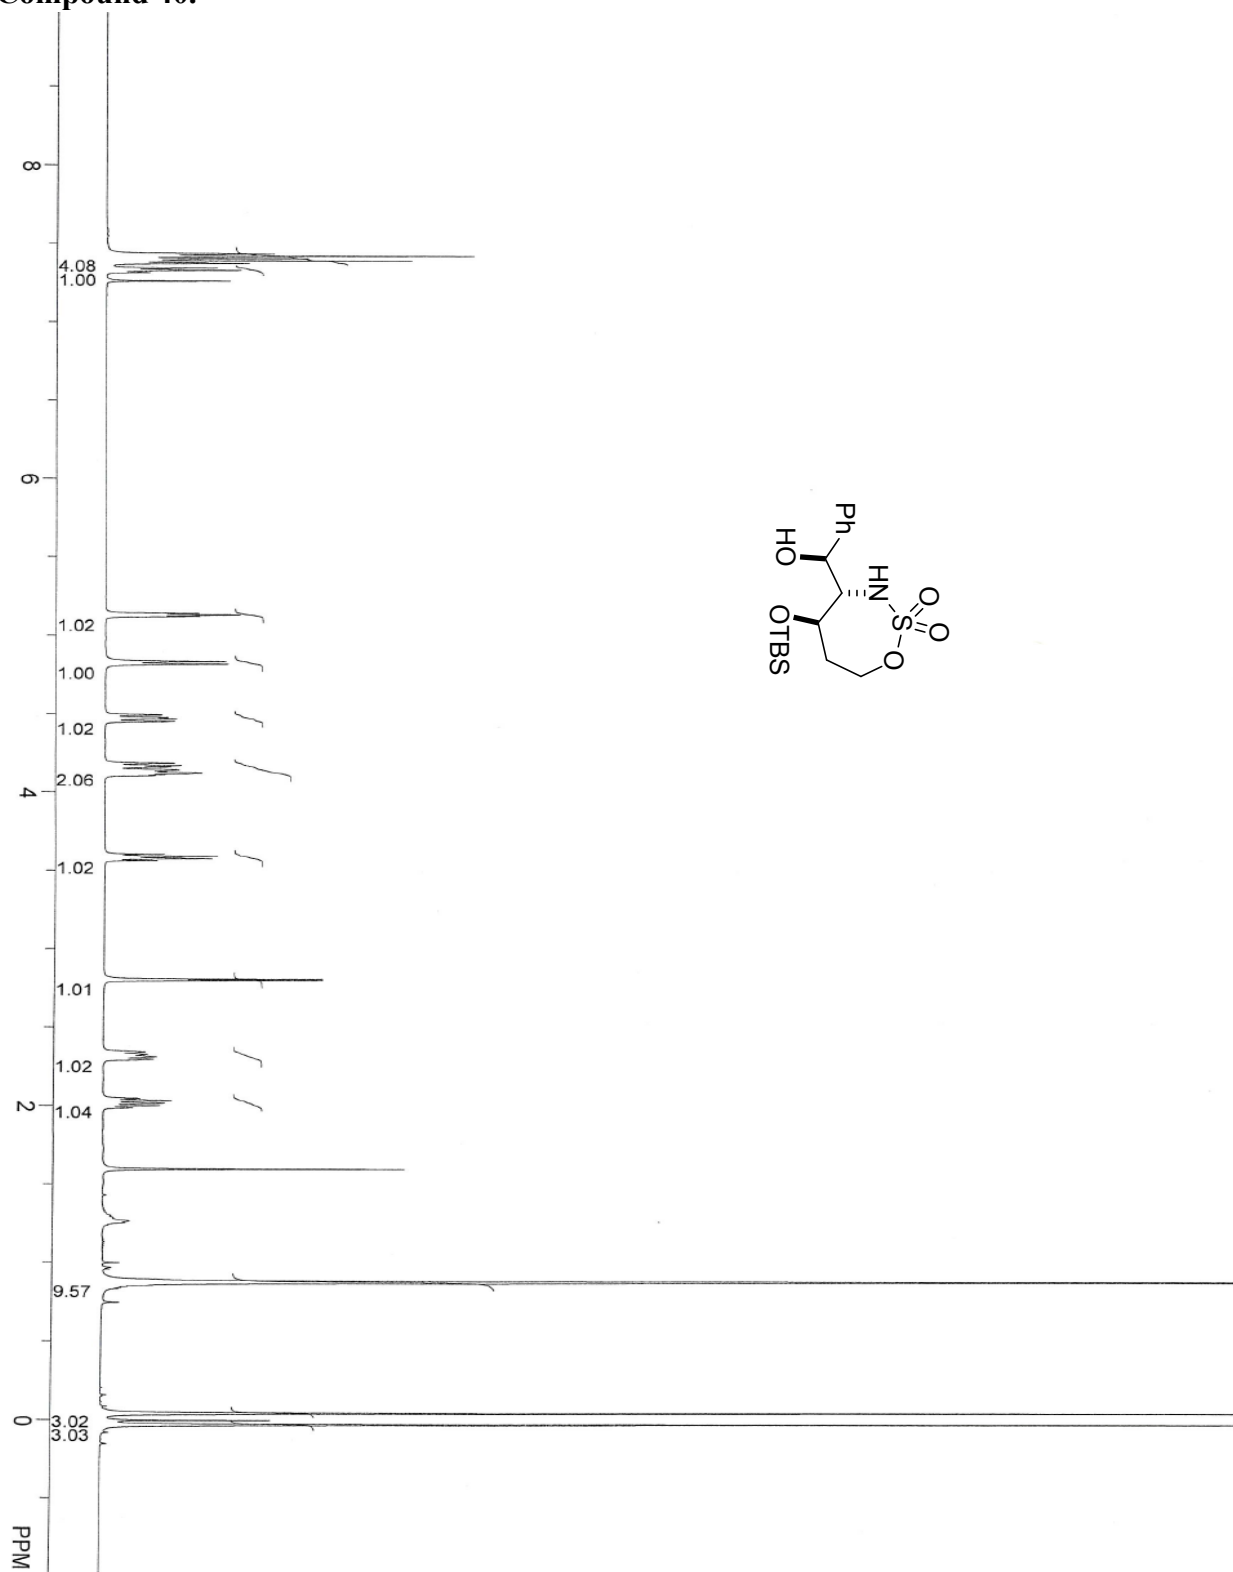

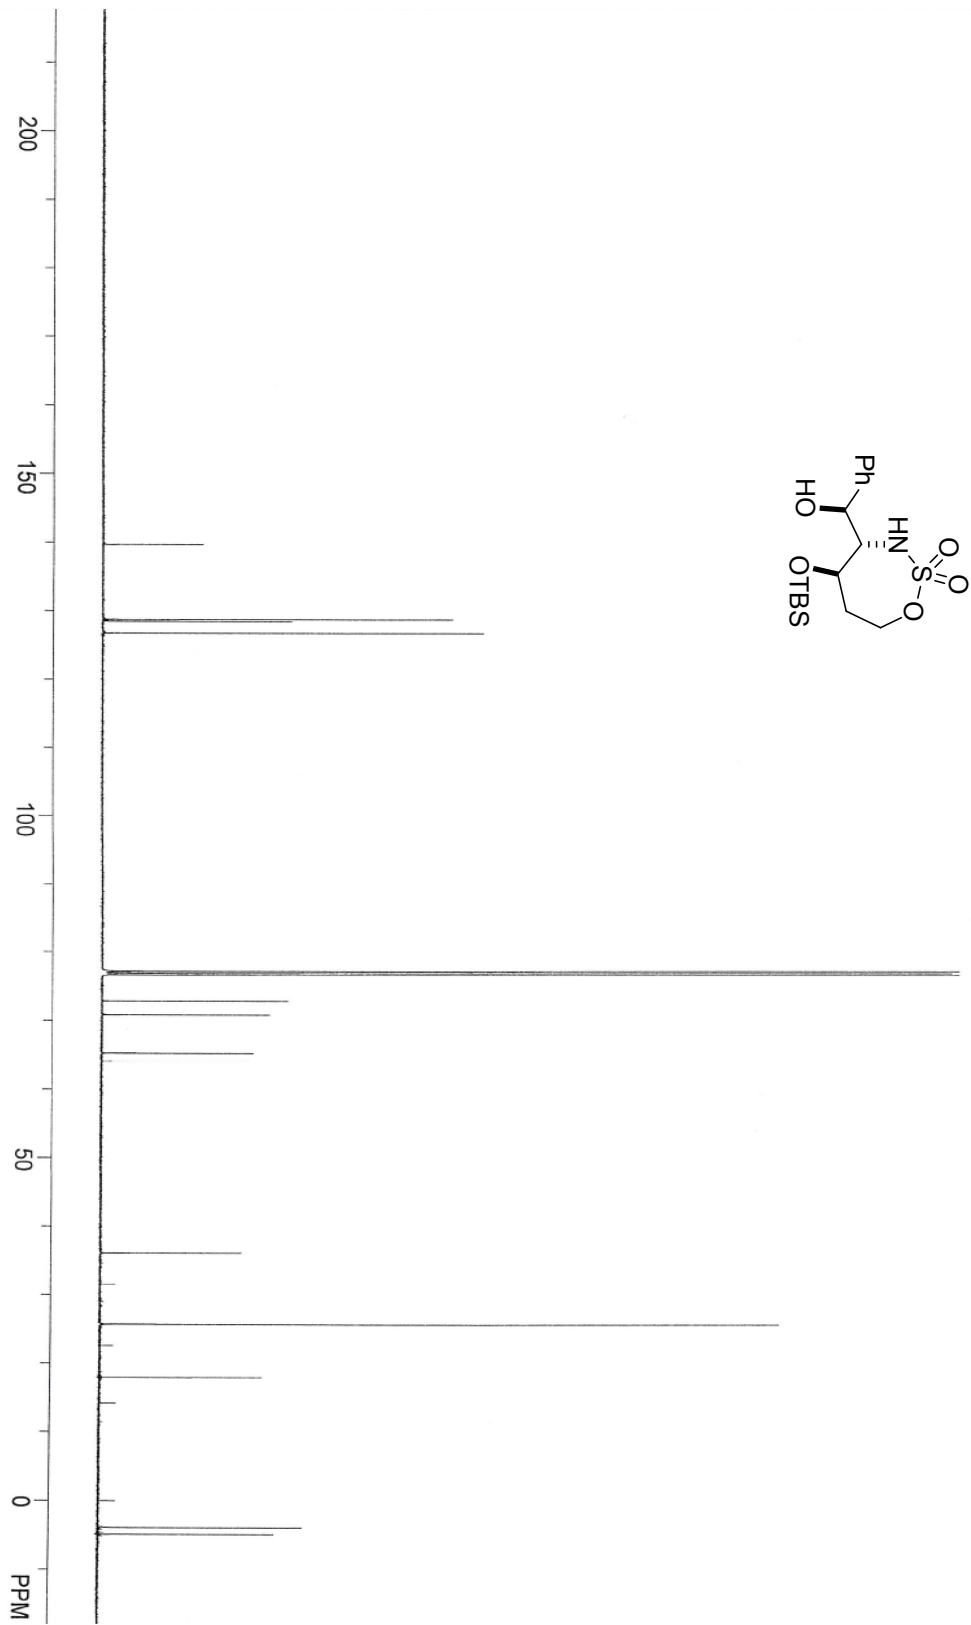

**Compound 41.**

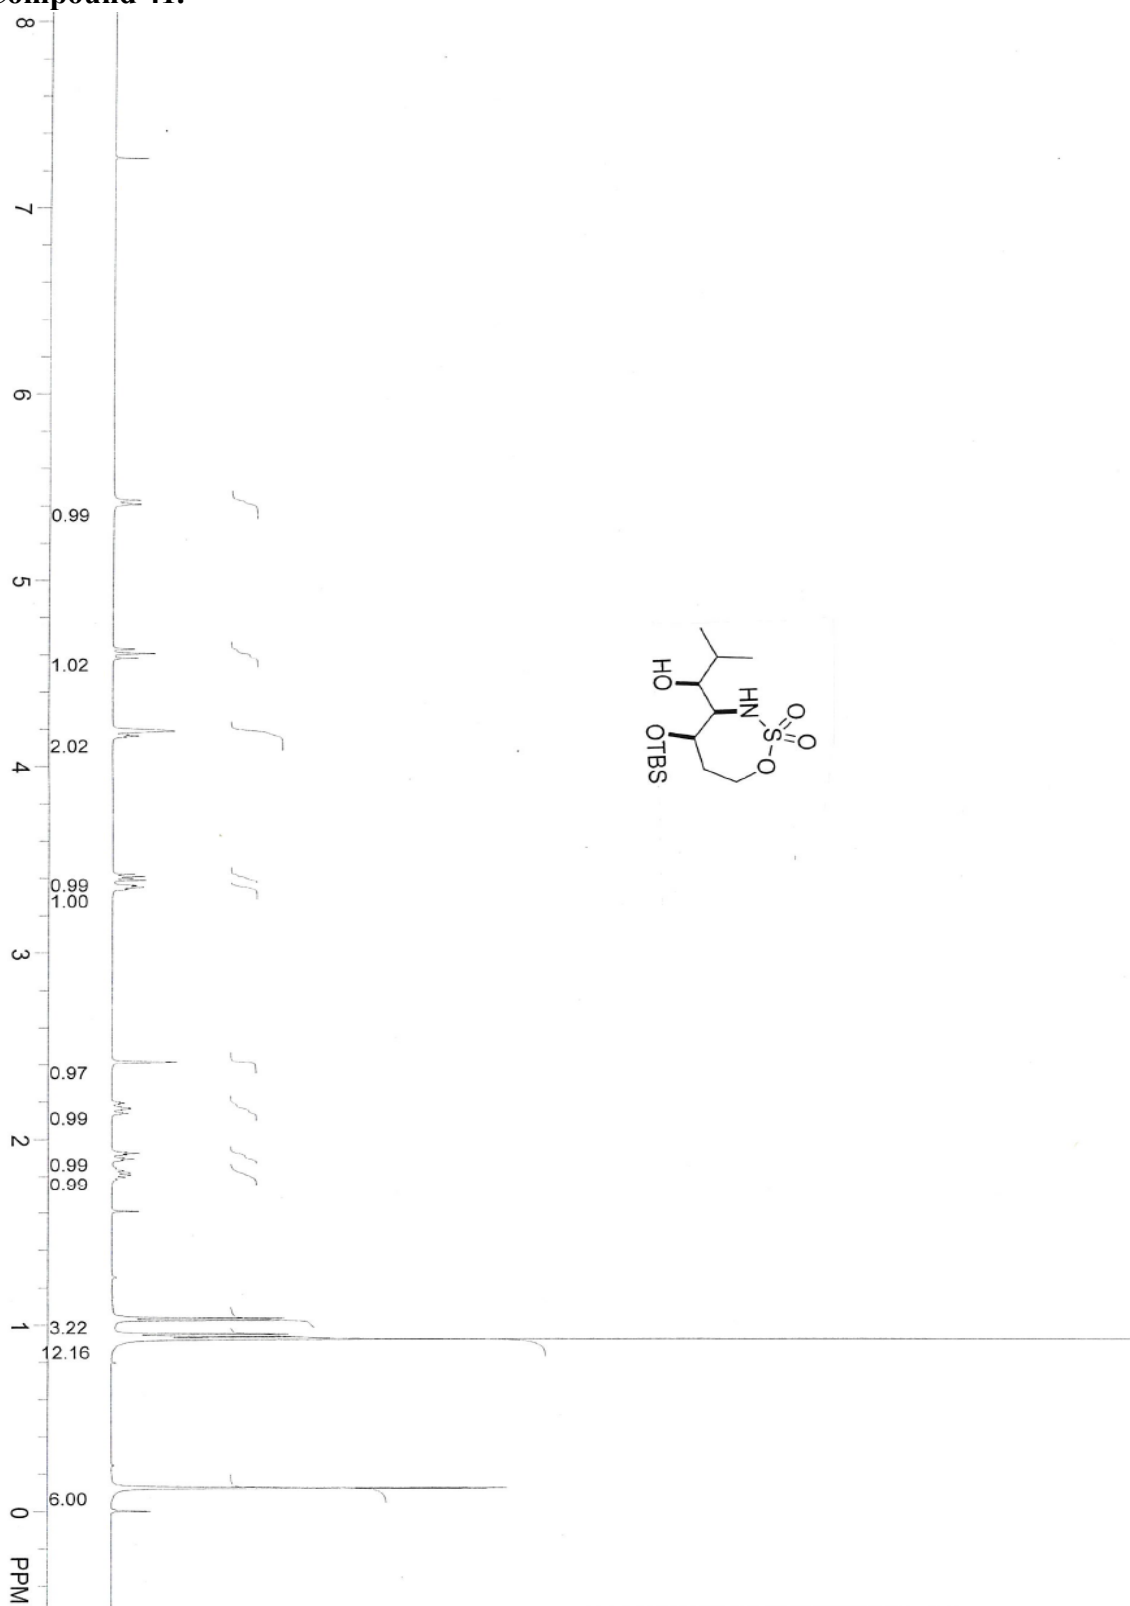



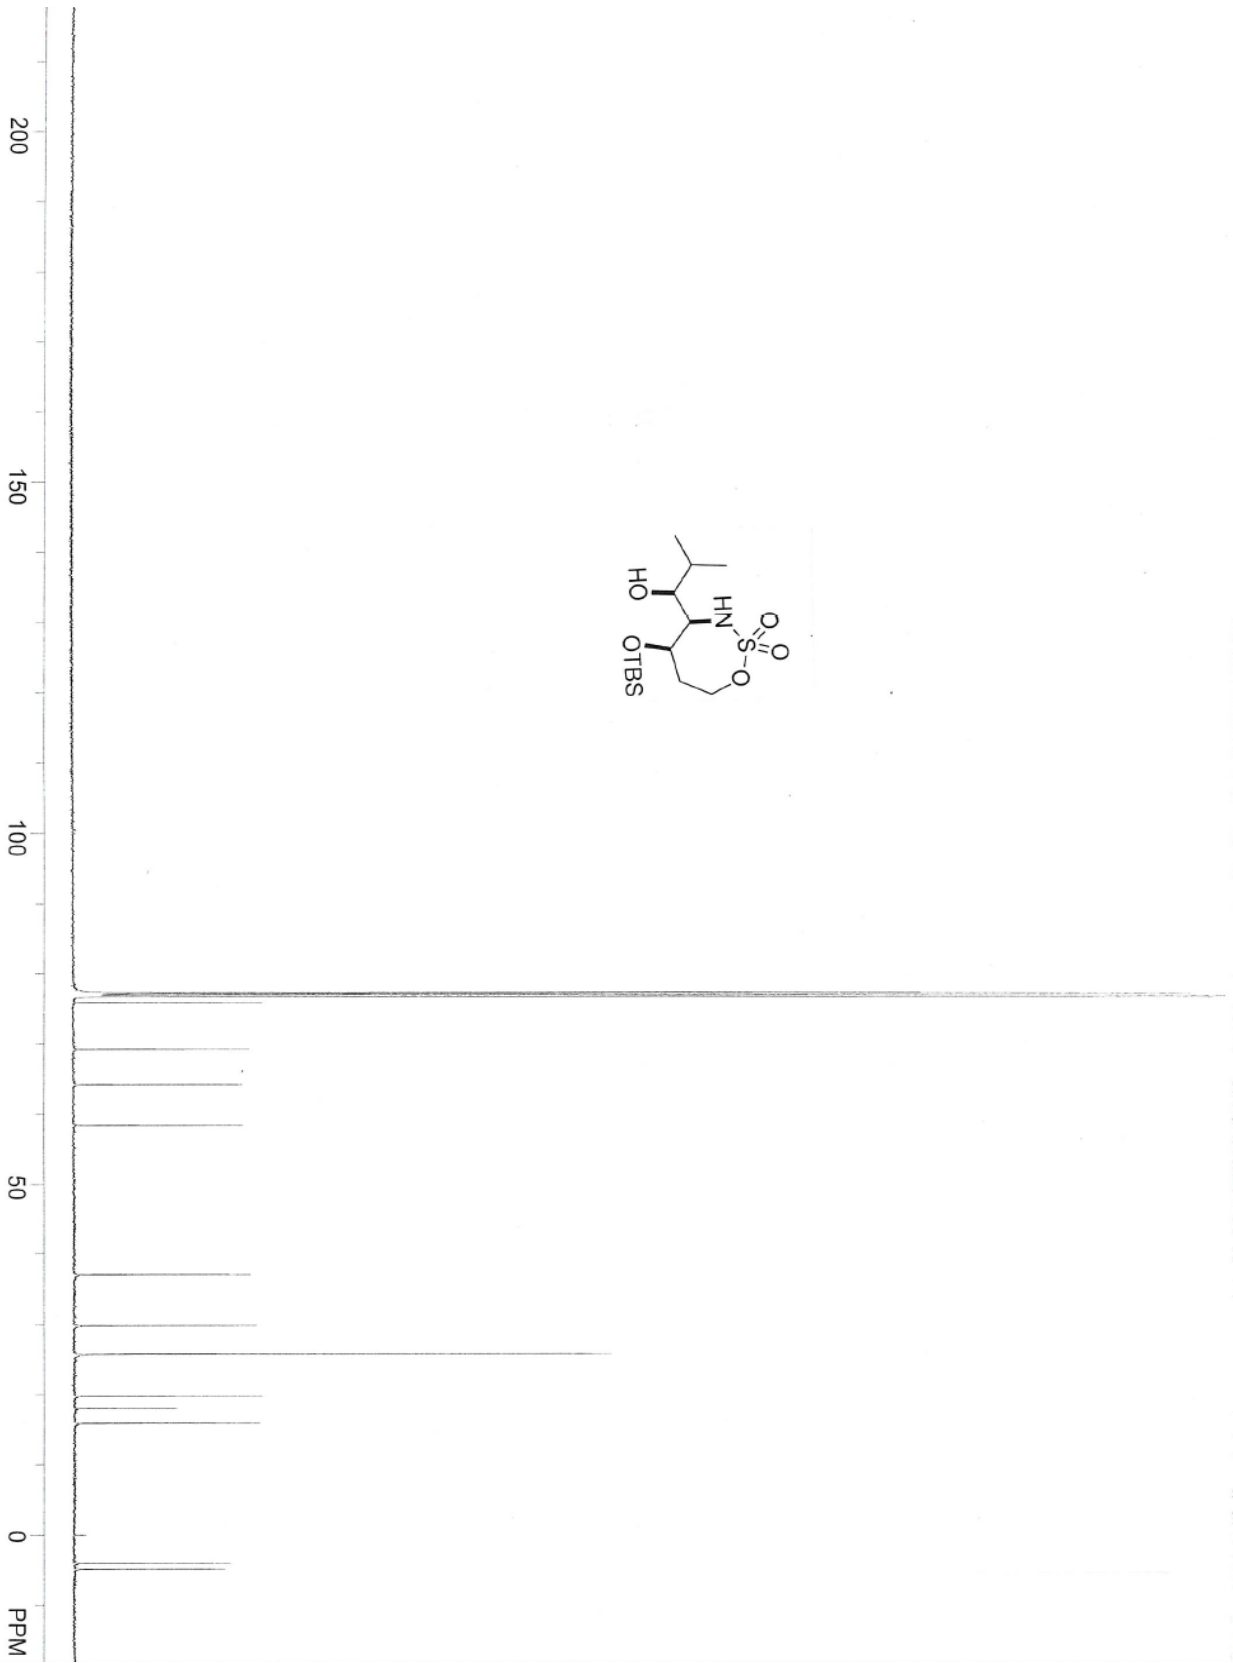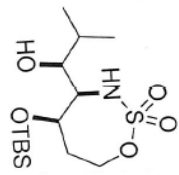





Compound 43.

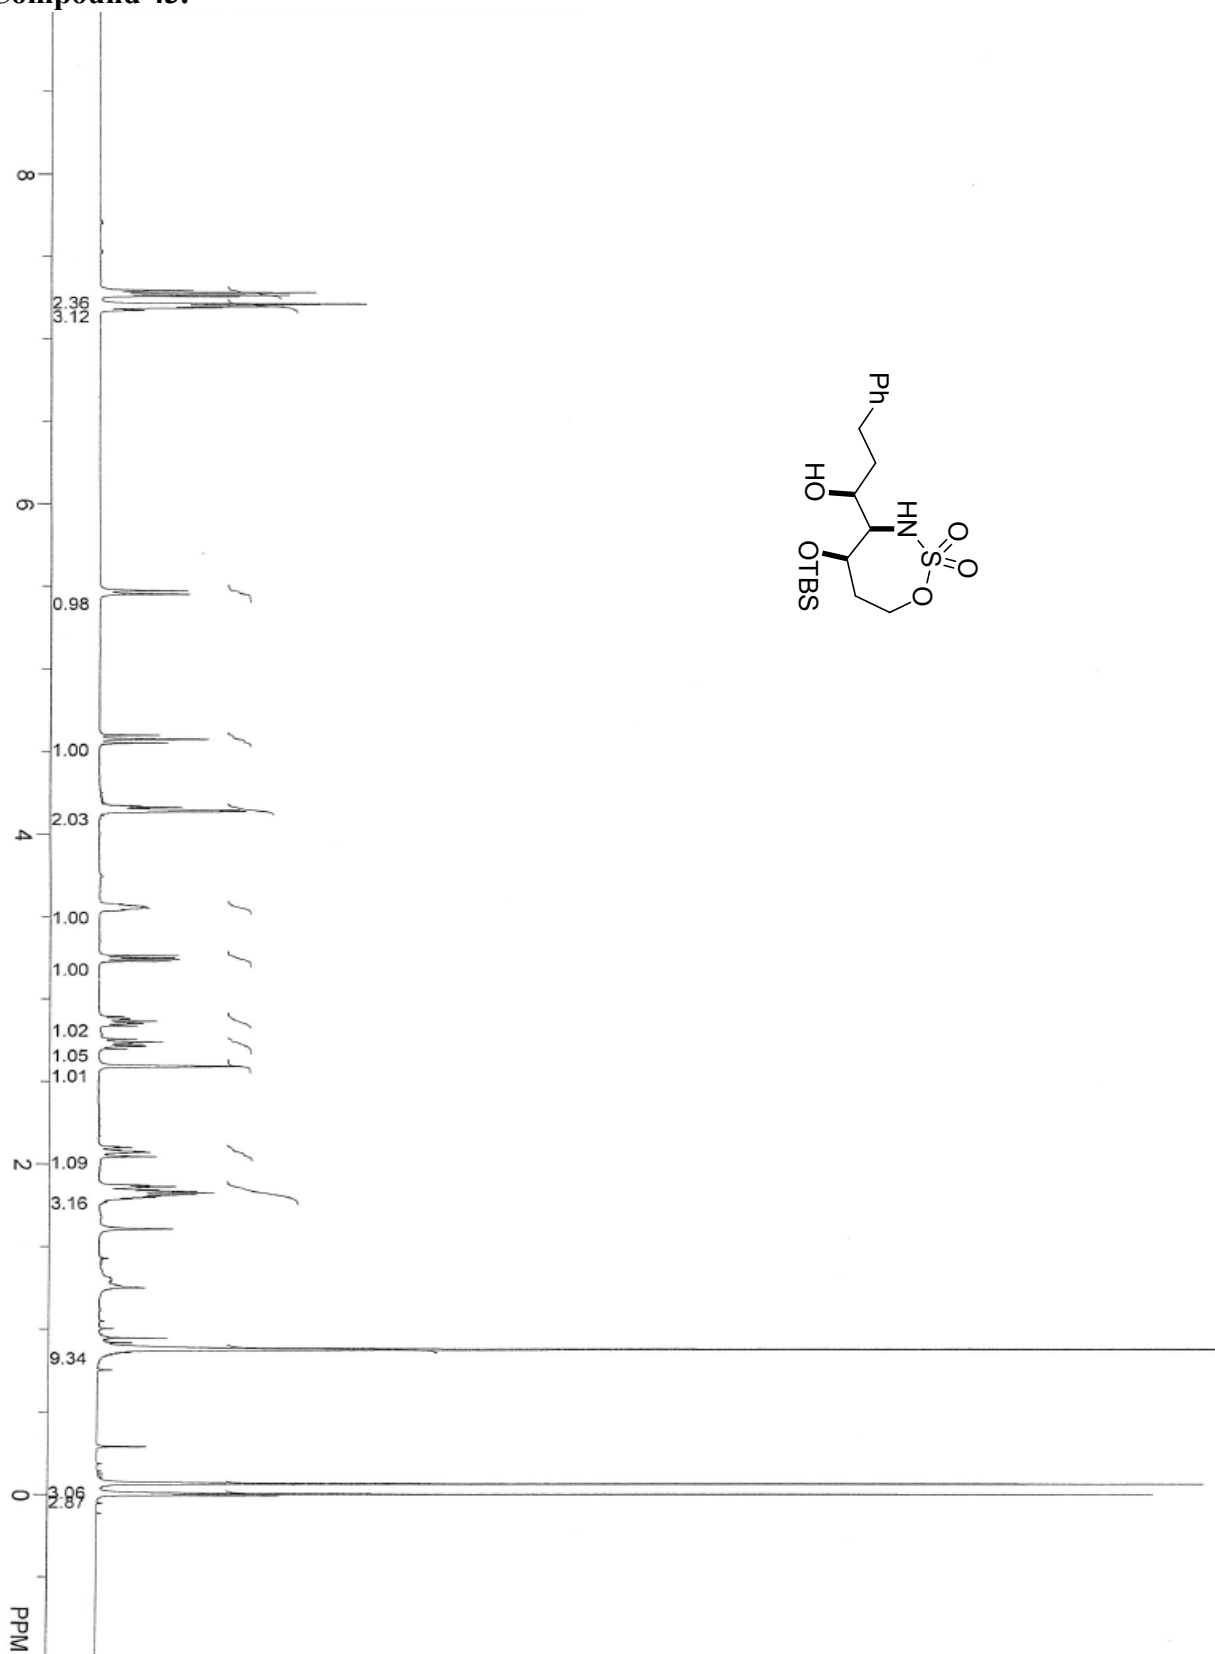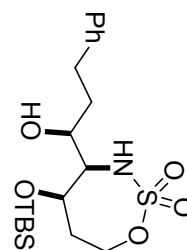

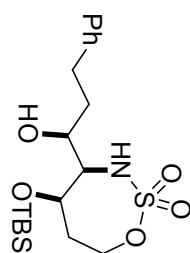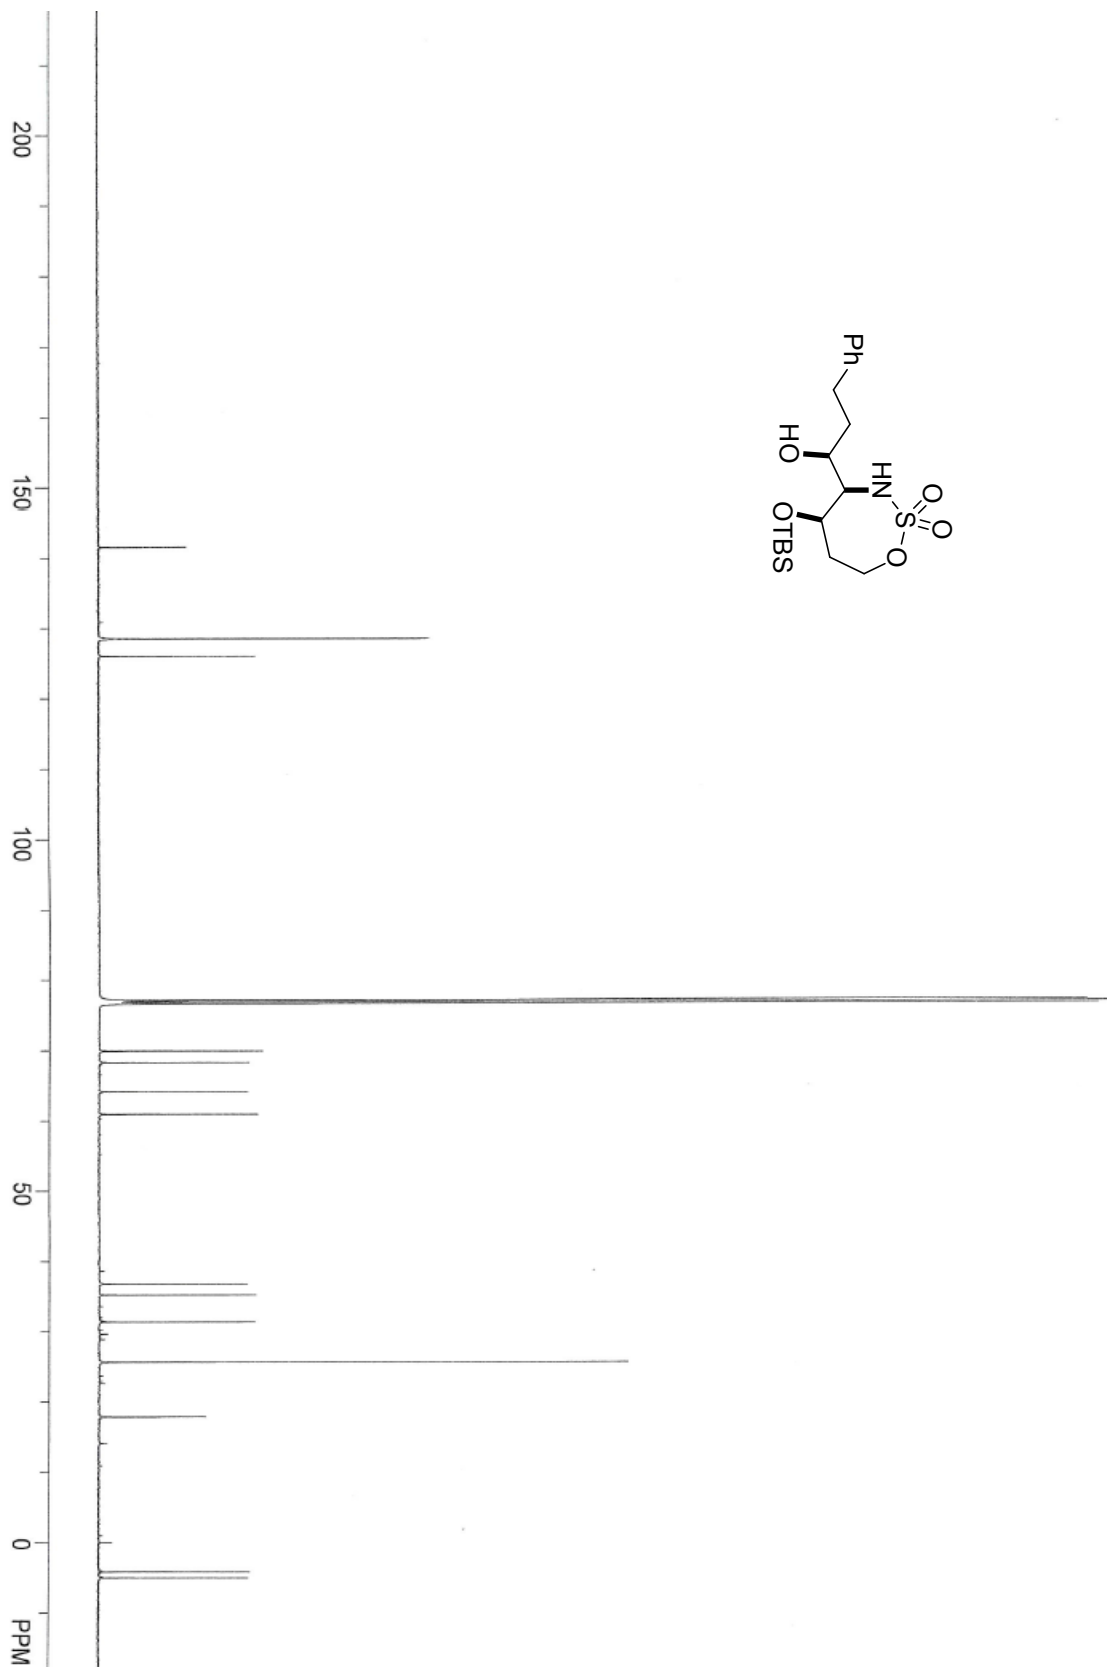

**Compound 44.**

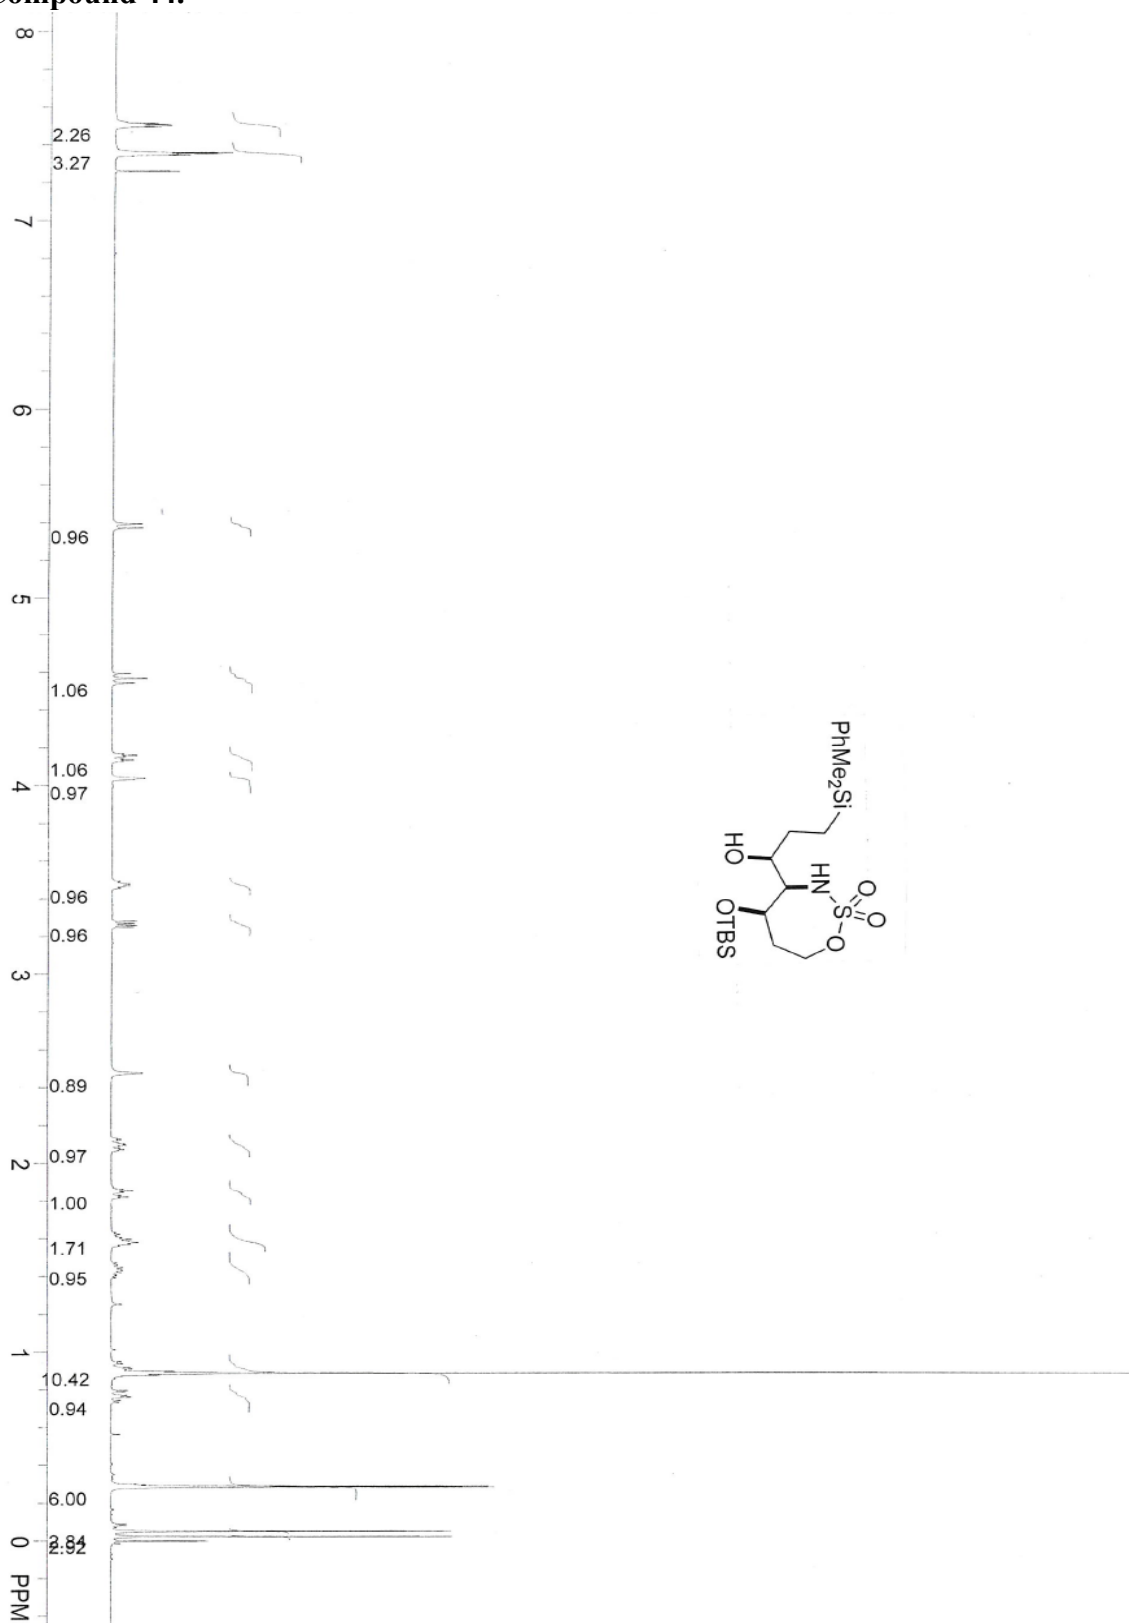

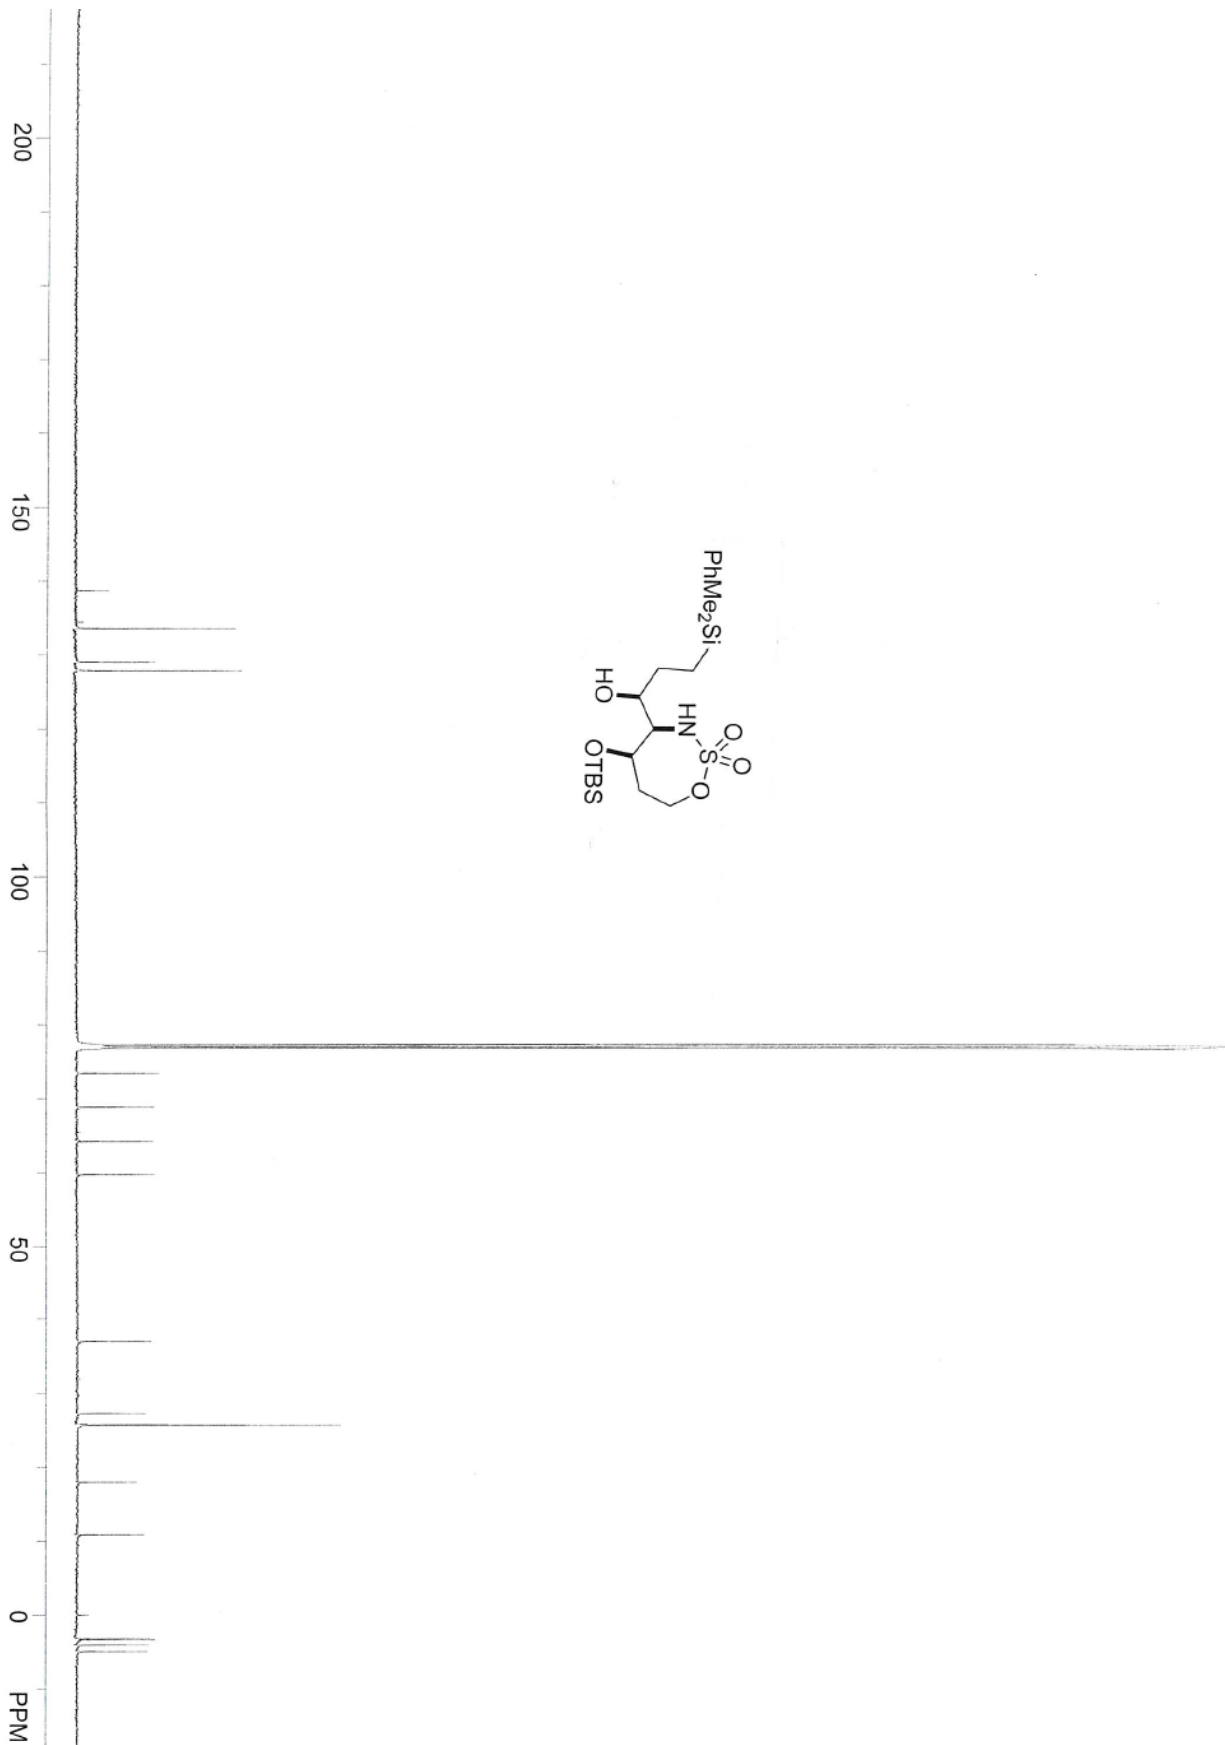

Compound 45.

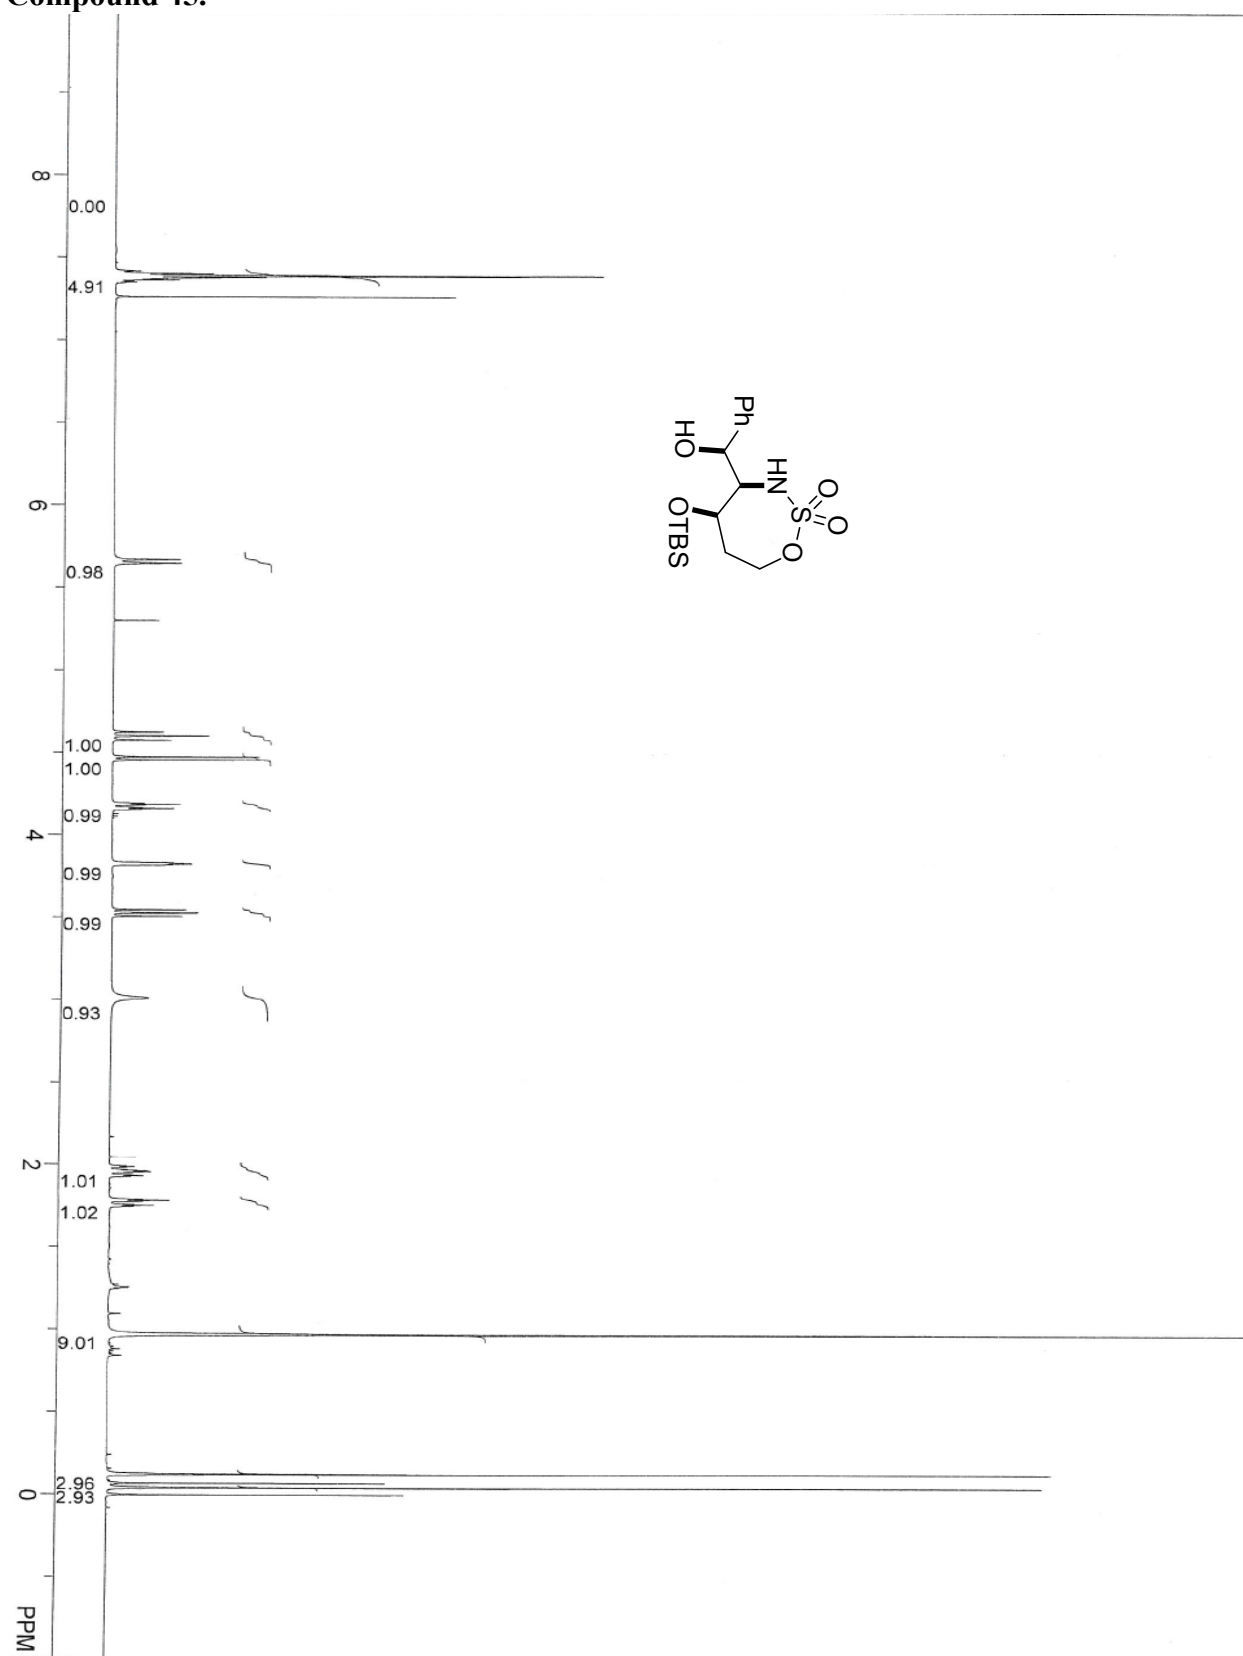



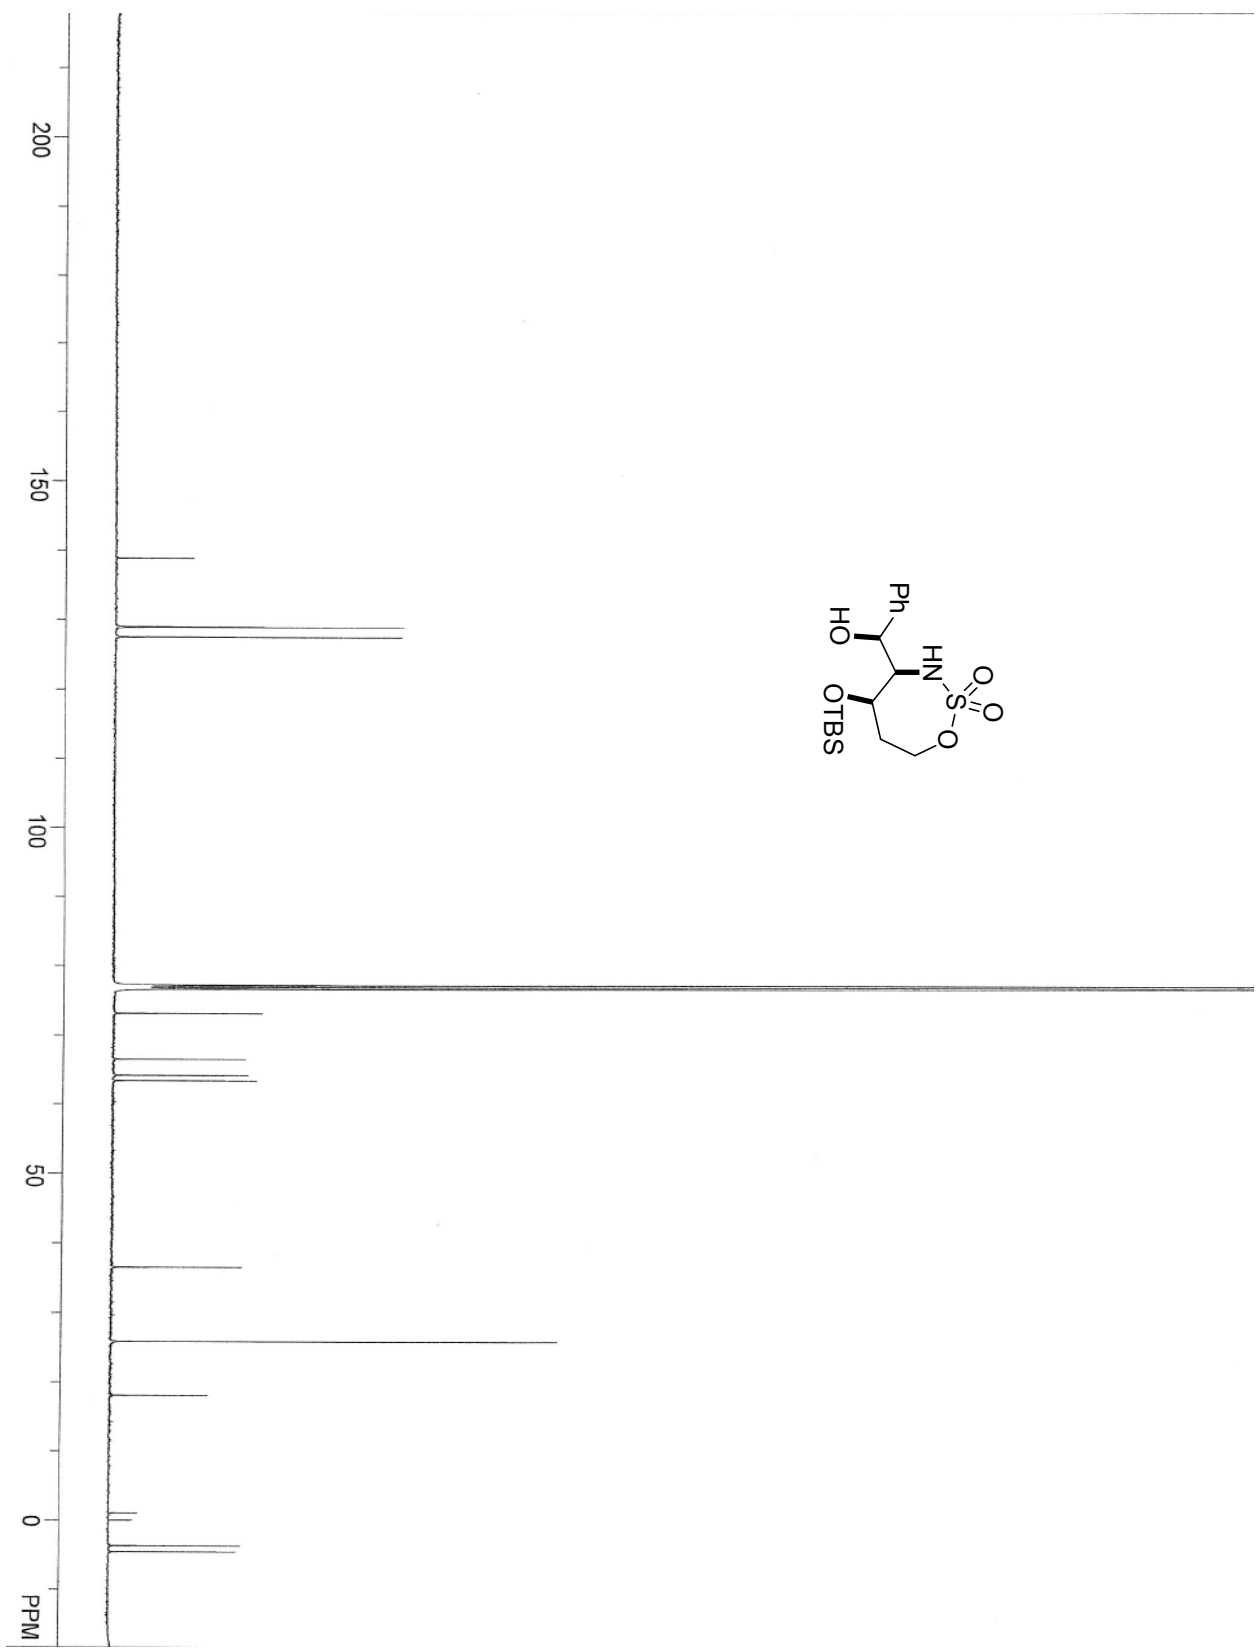

**Compound 48.**

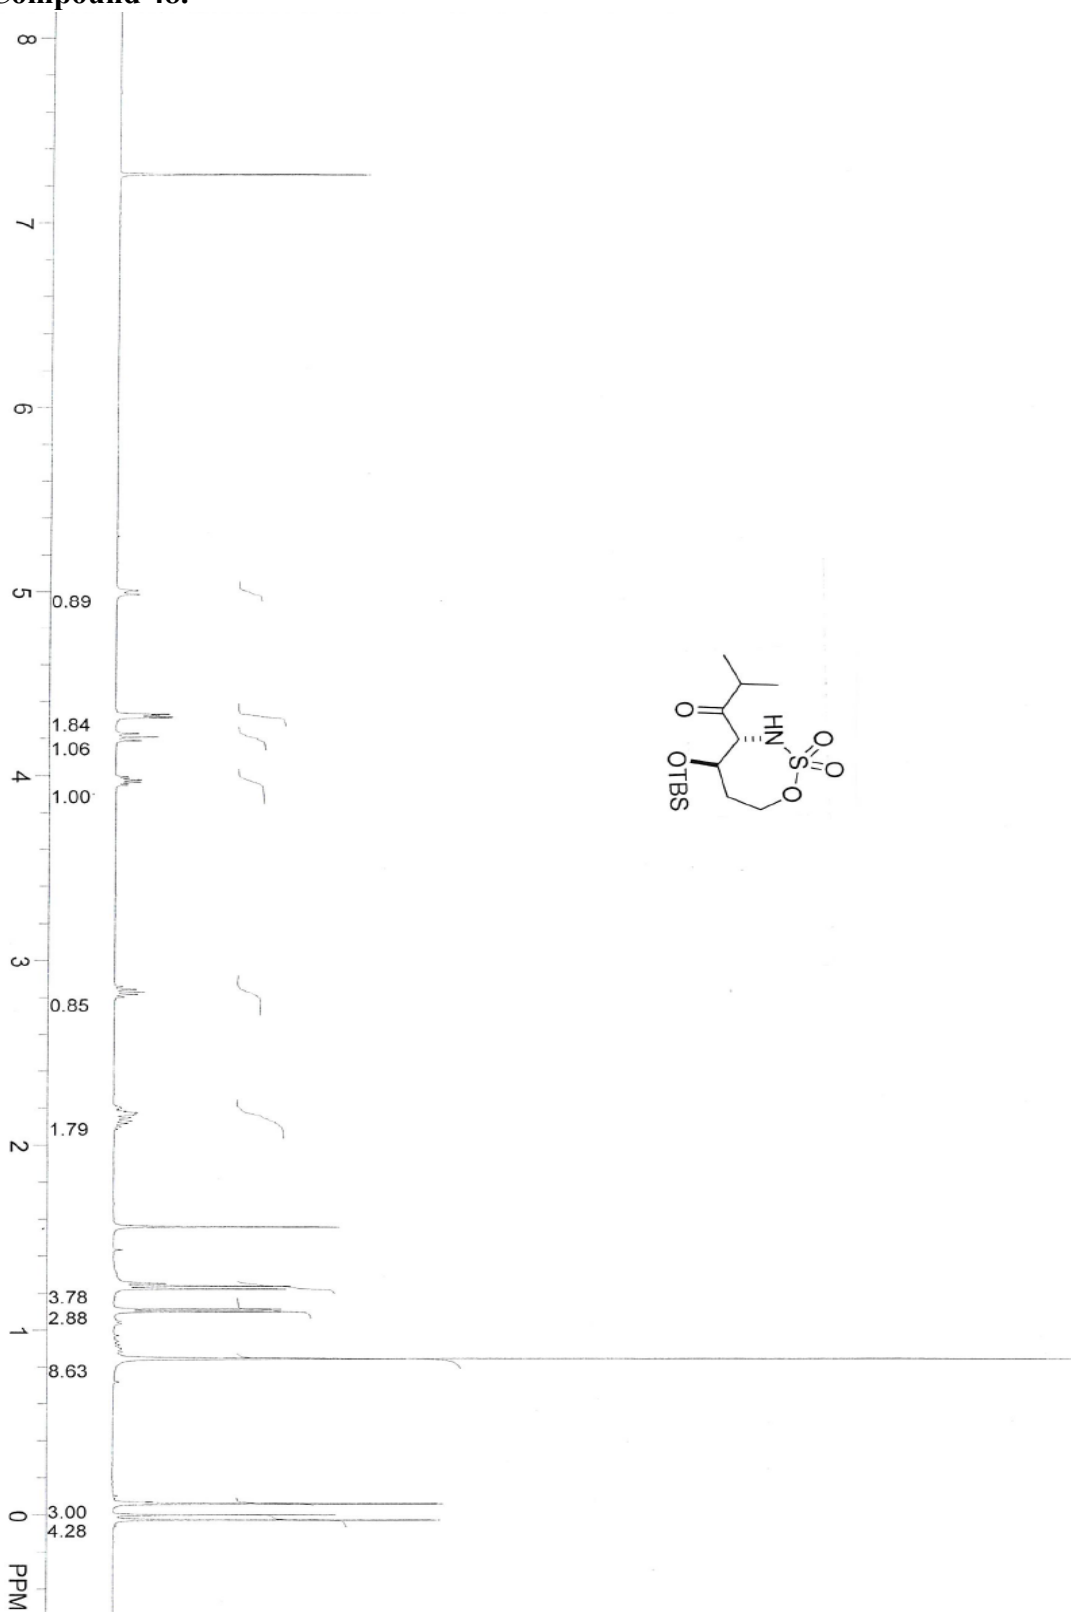

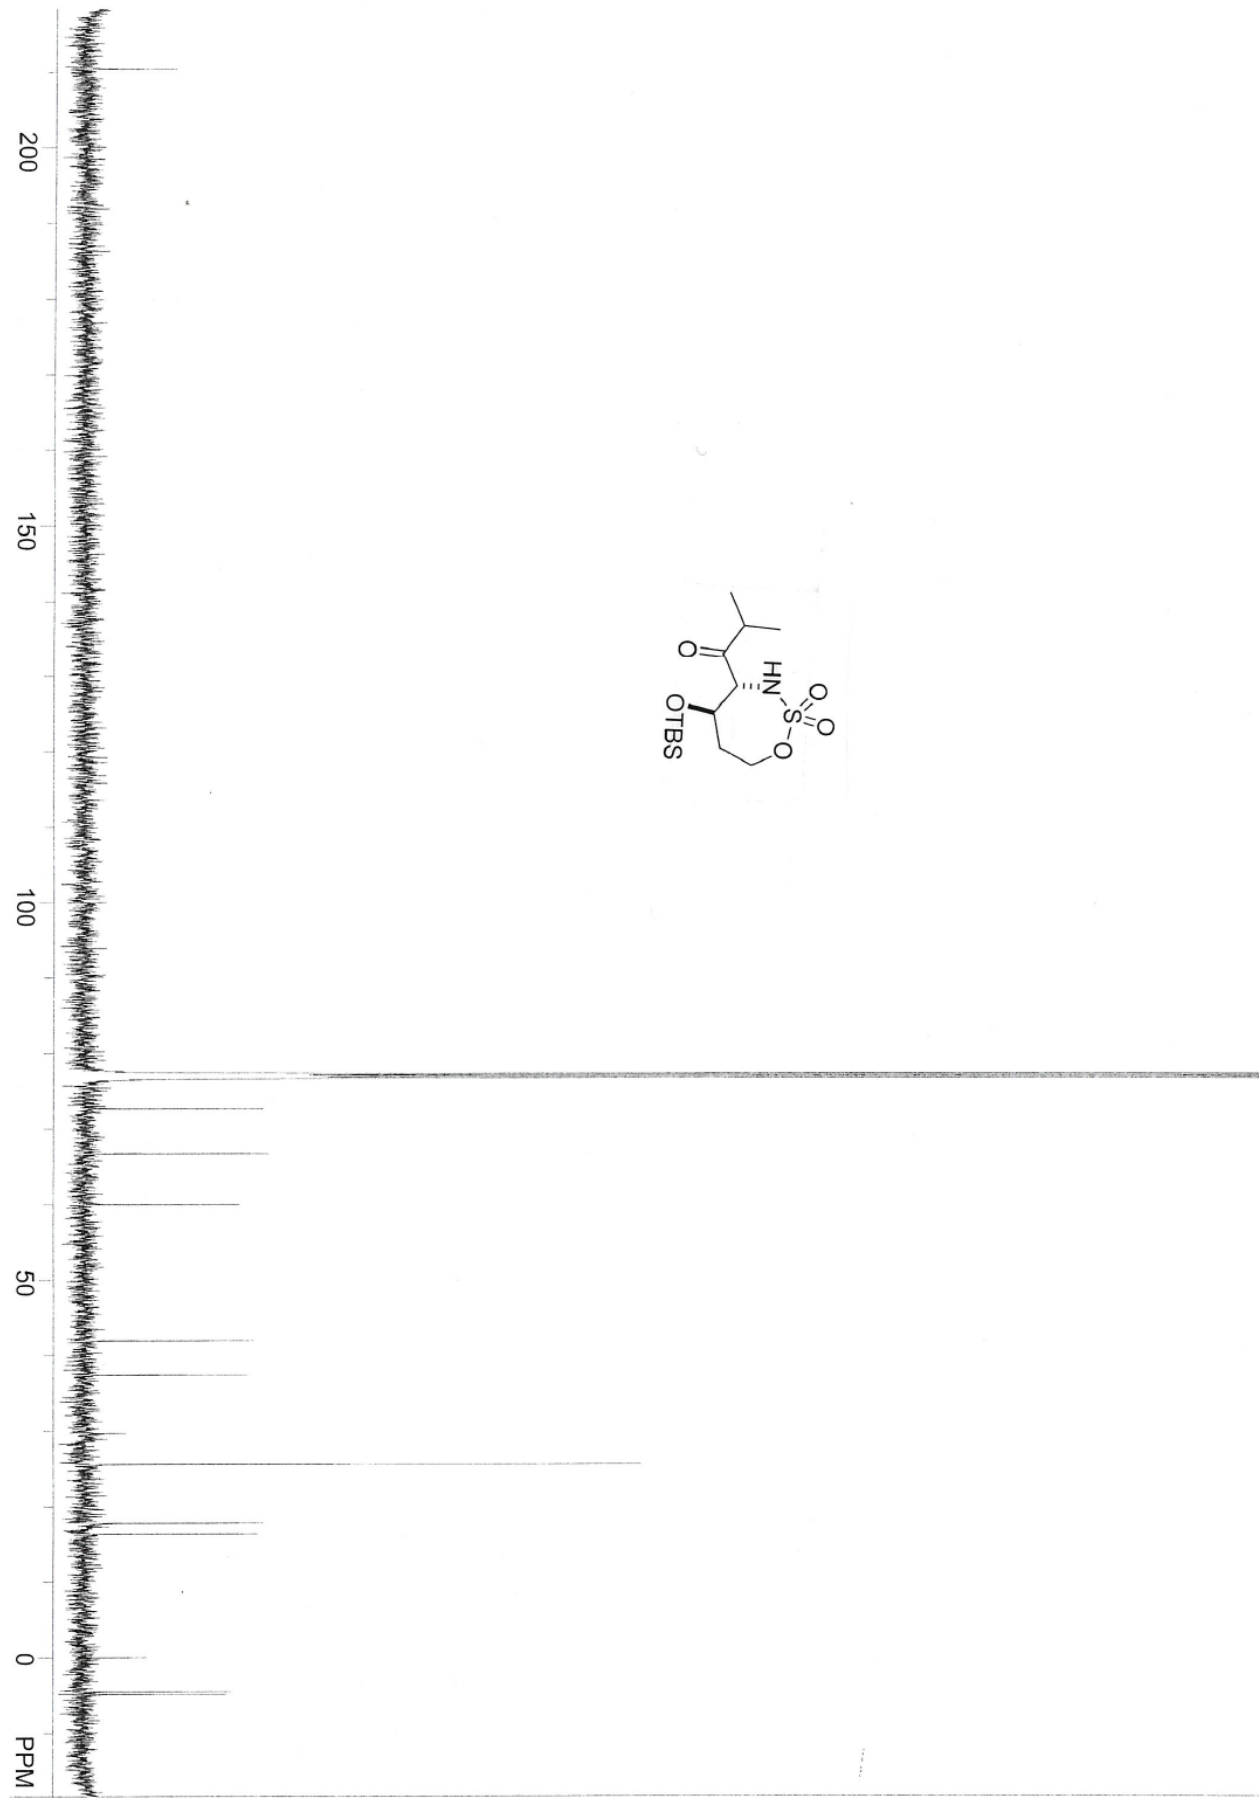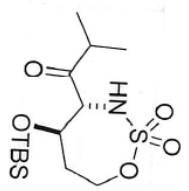

Compound 49.

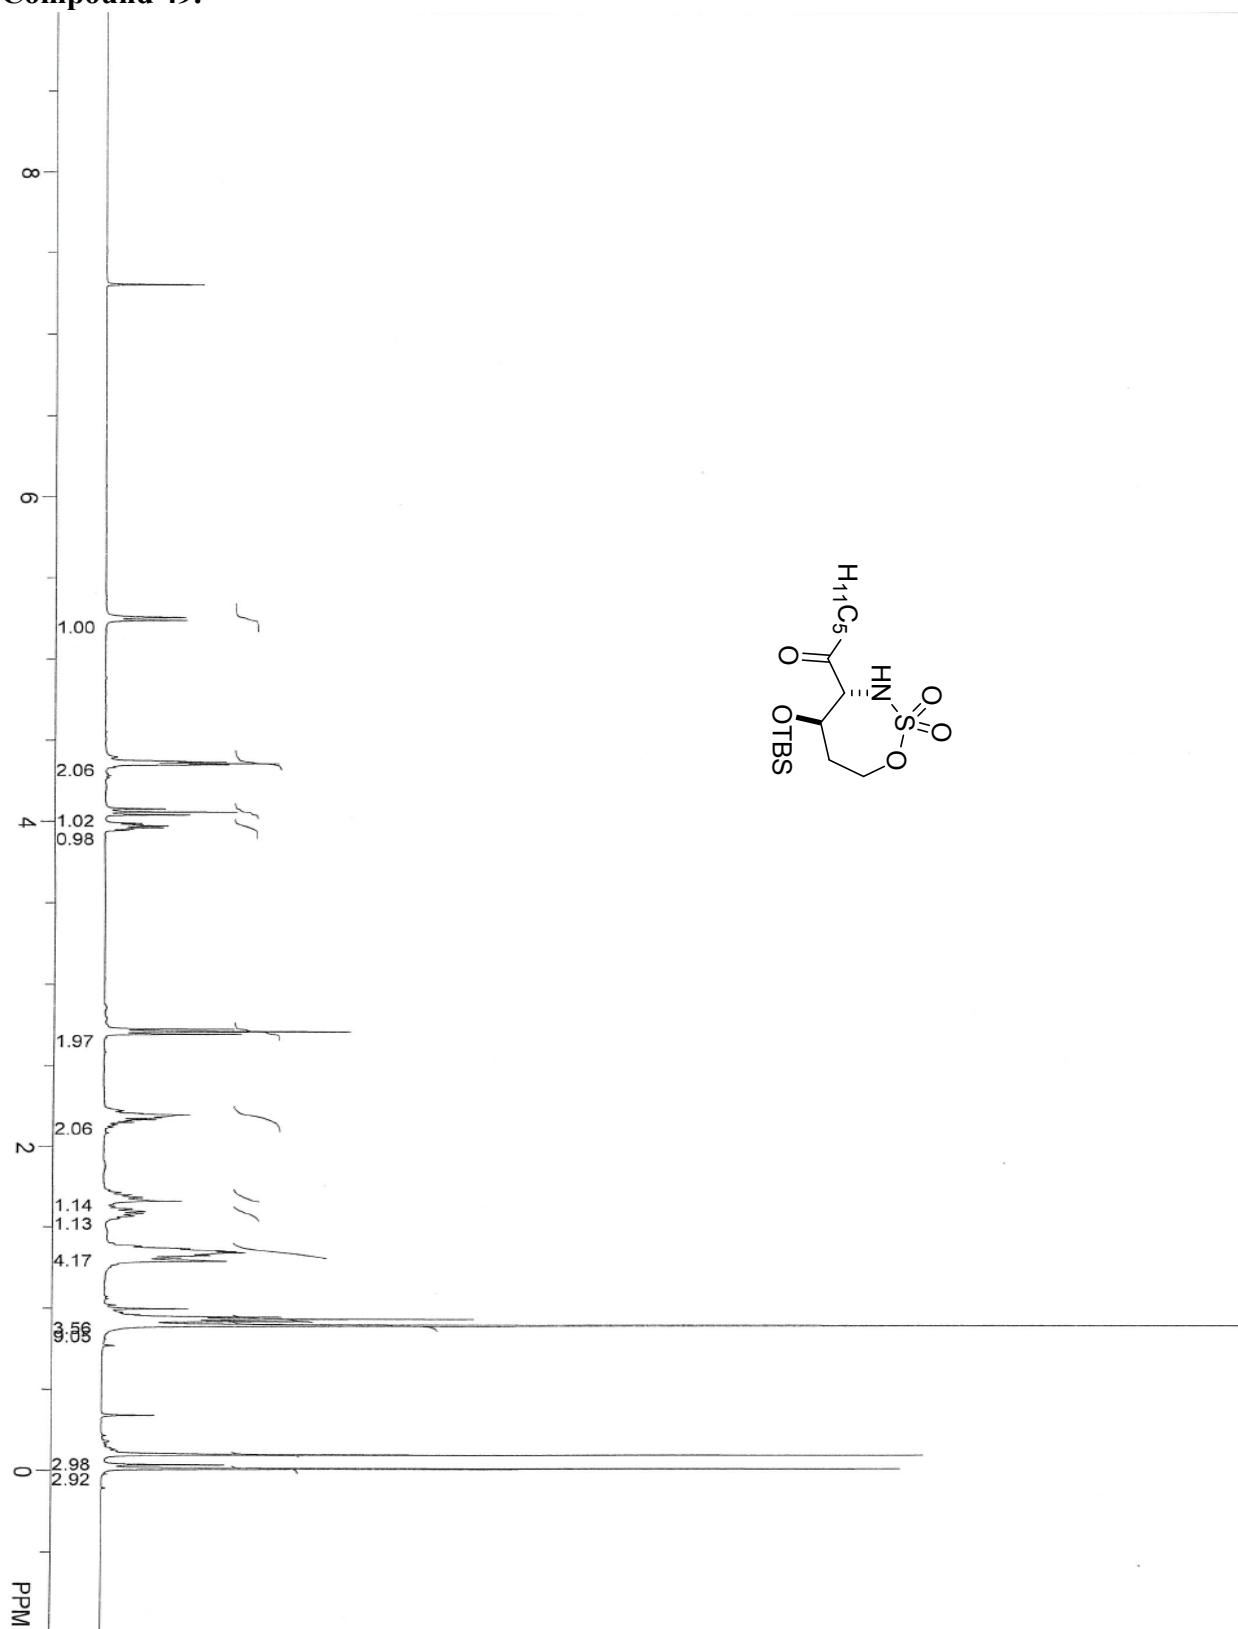

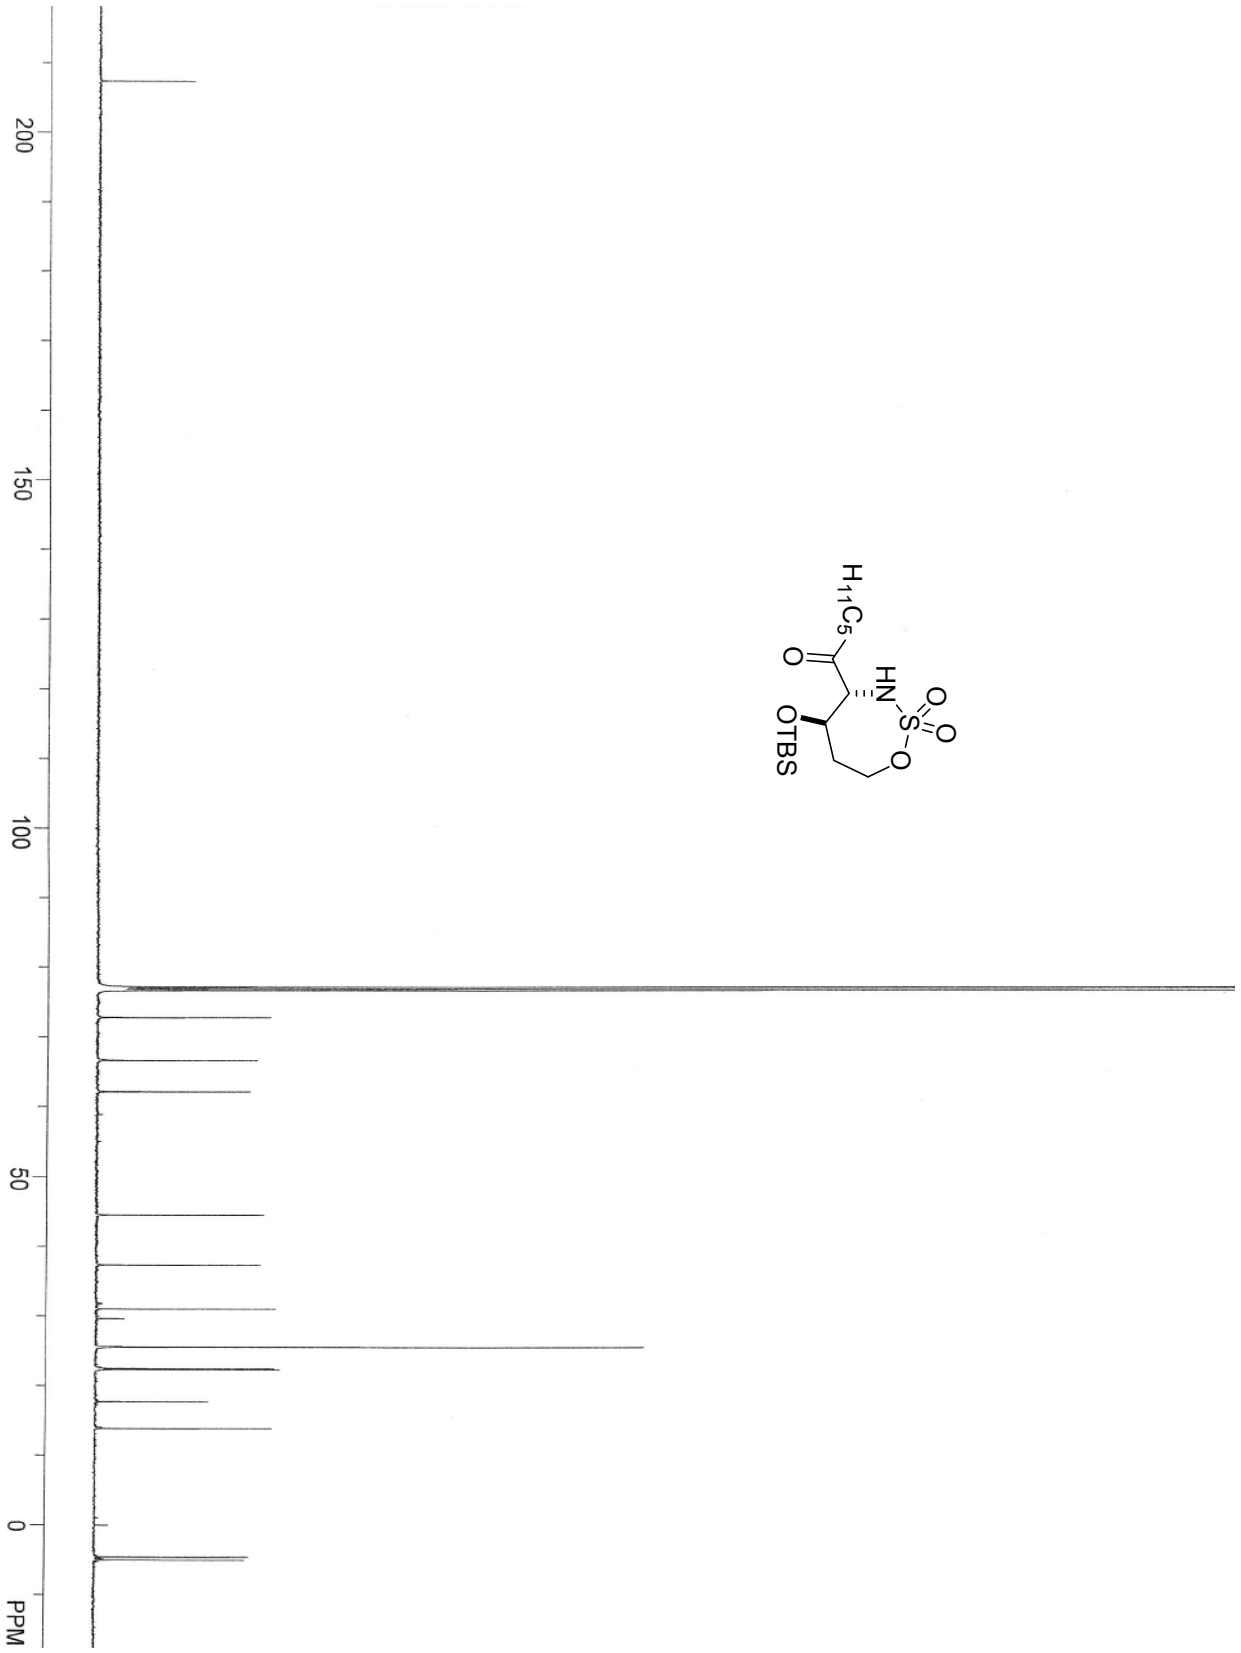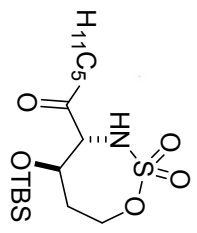



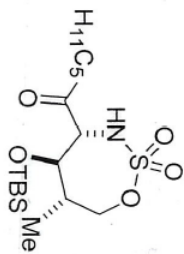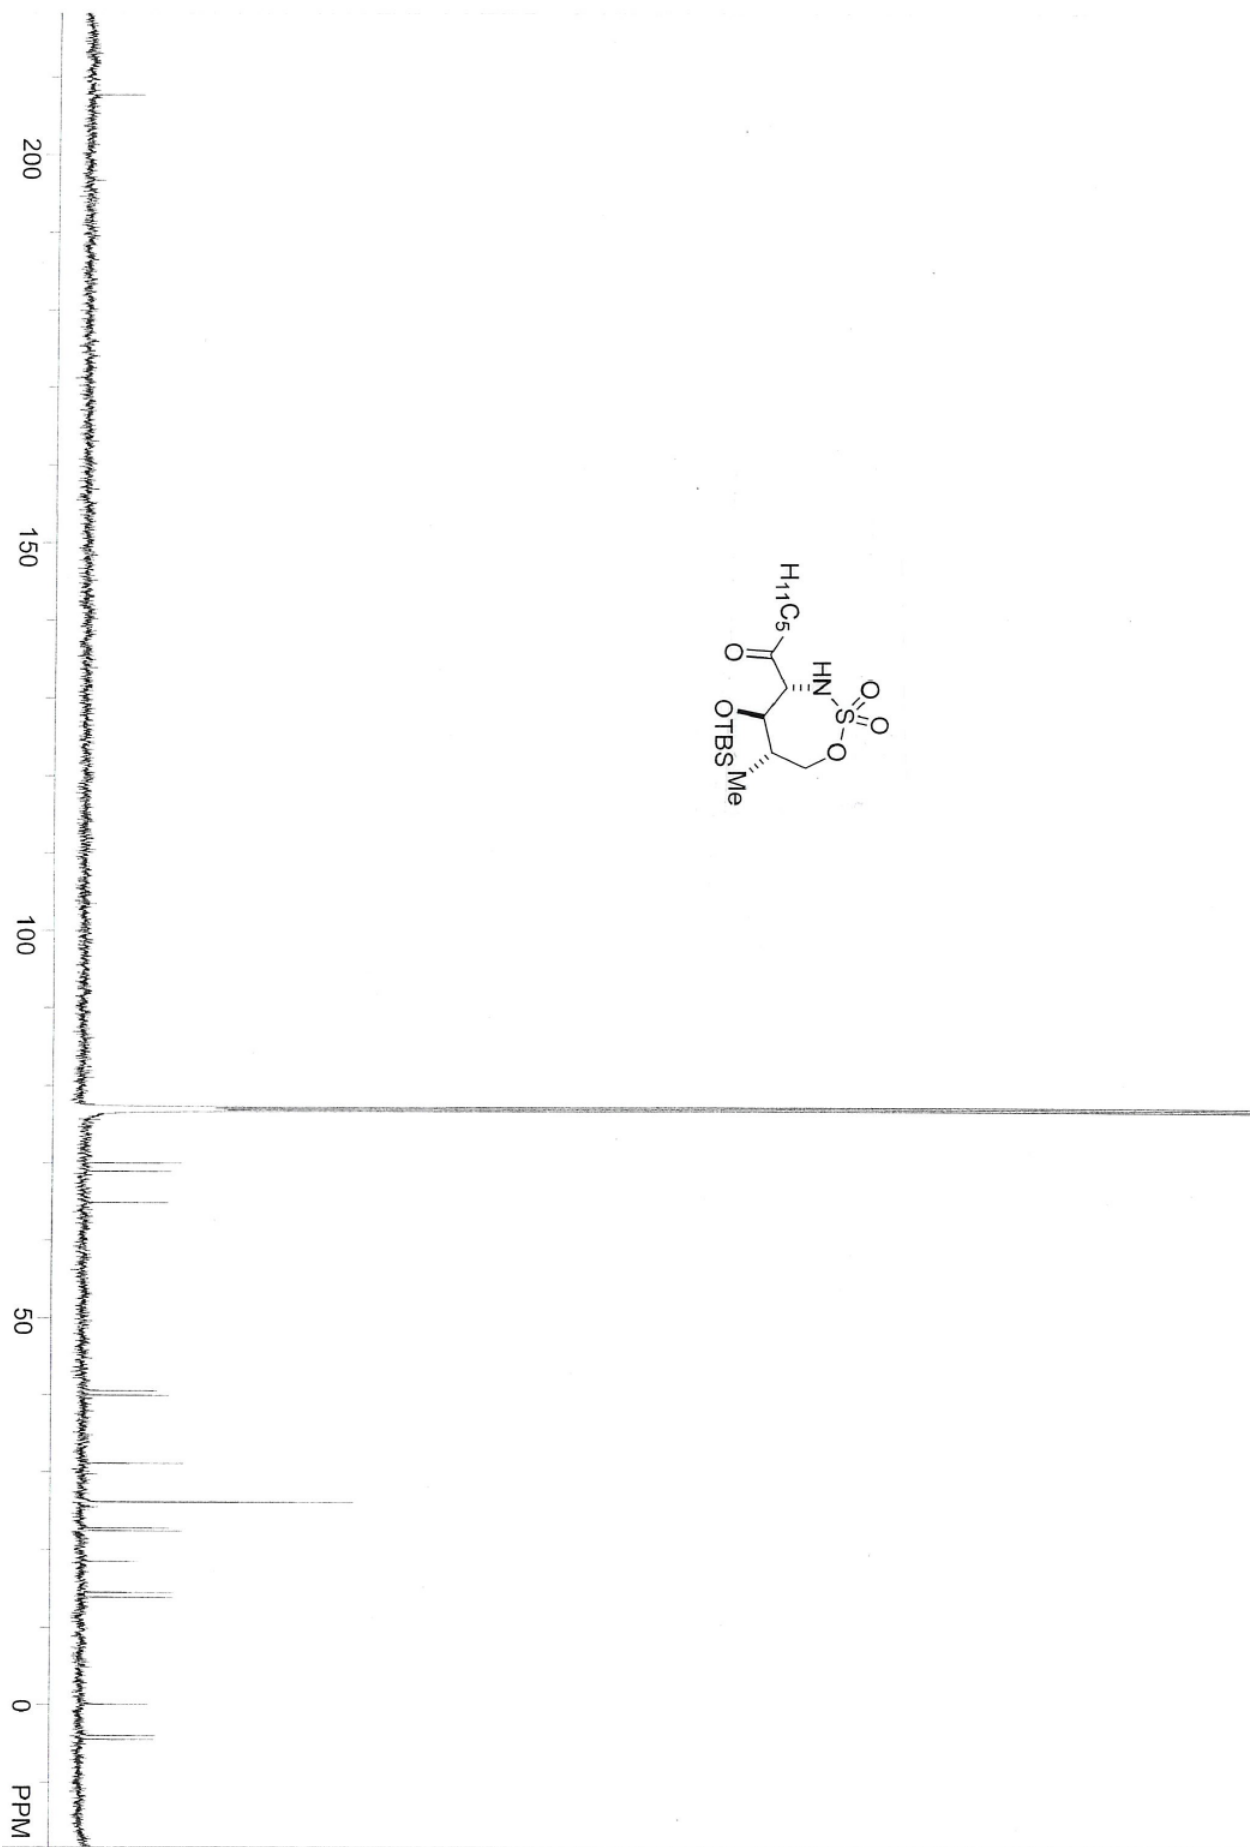





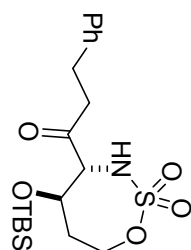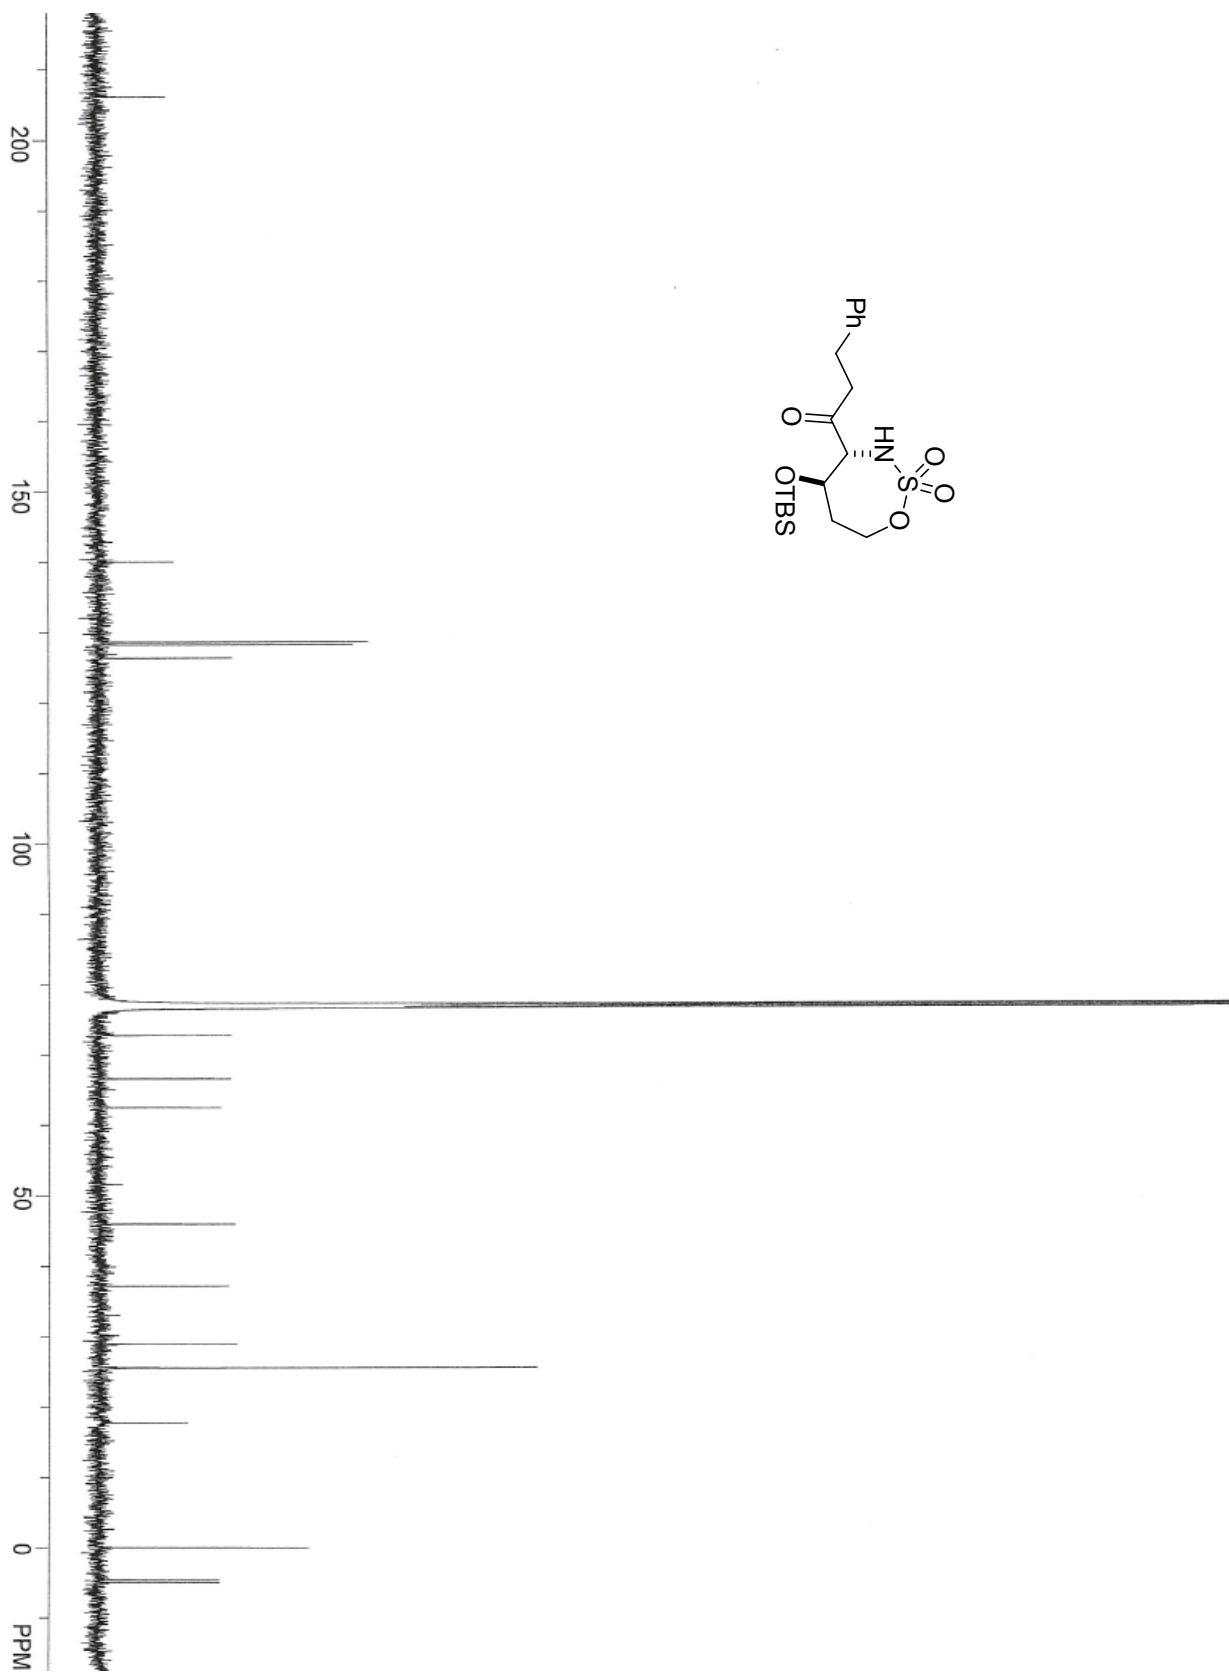

**Compound 52.**

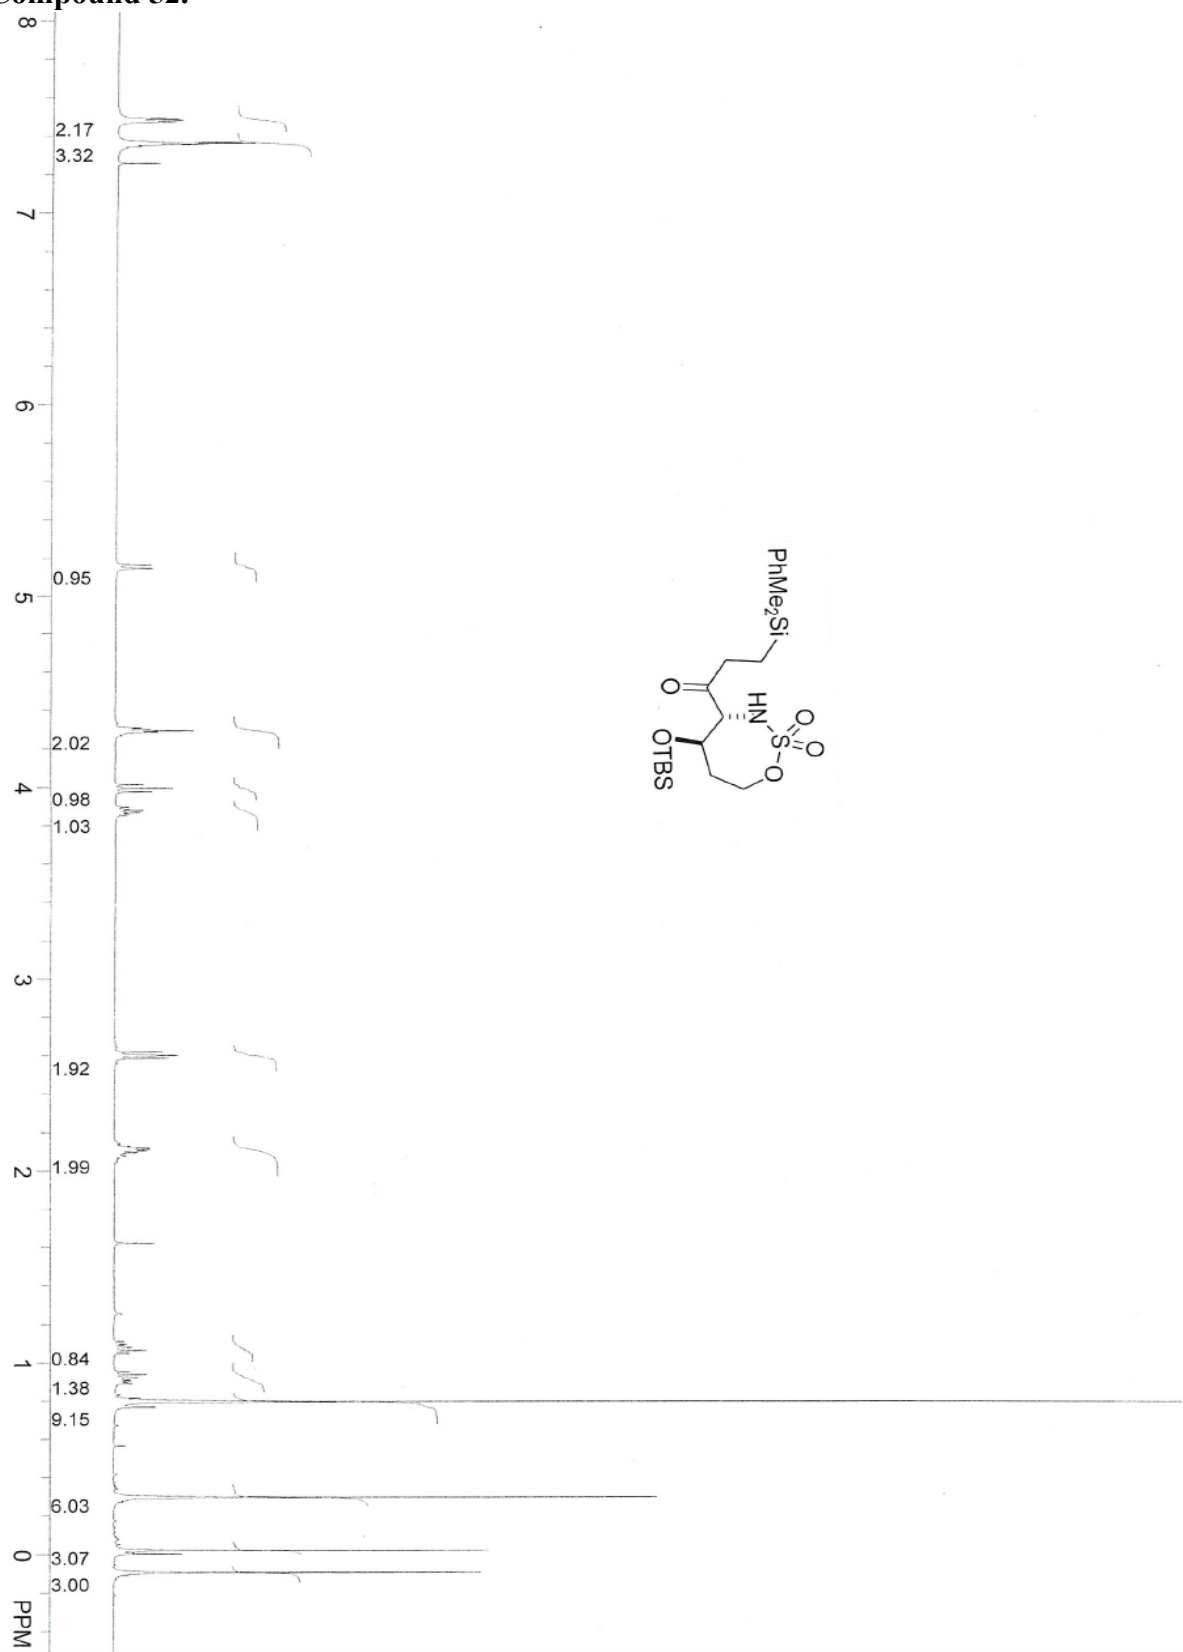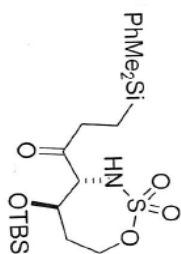

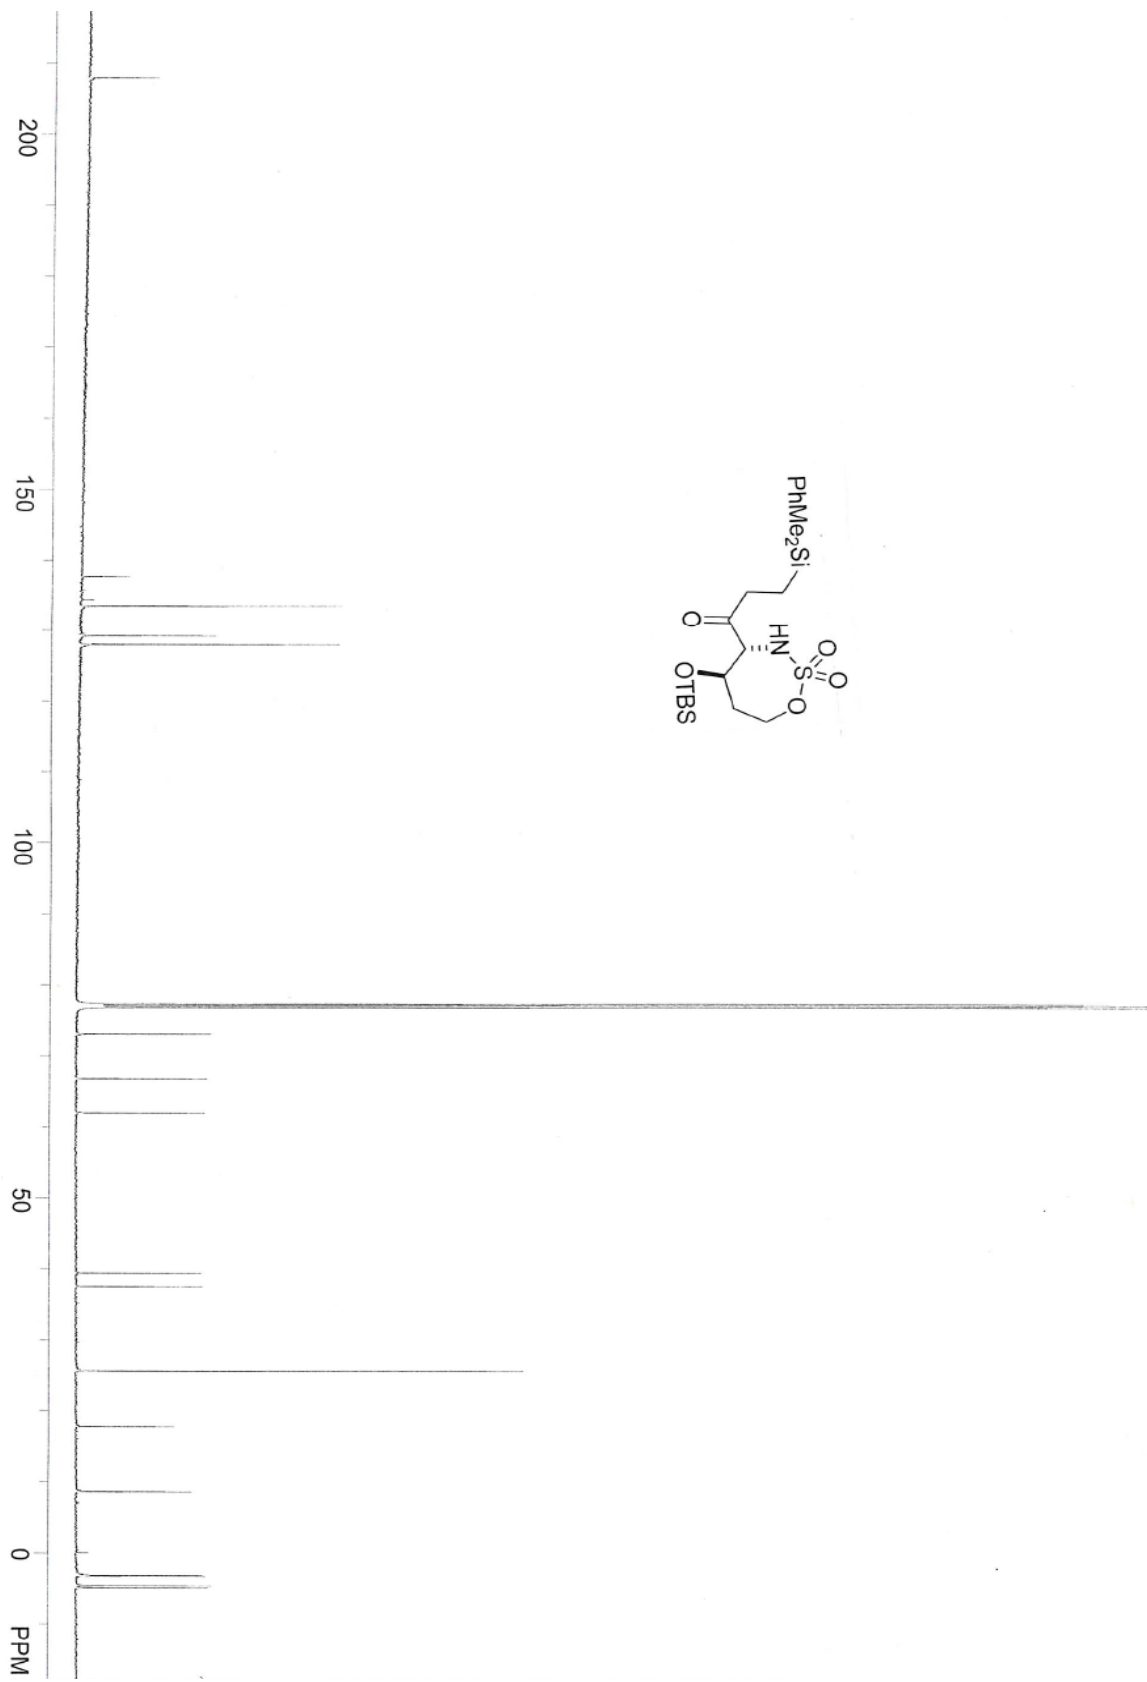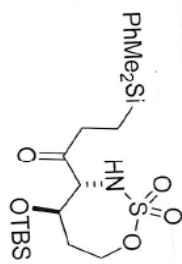

**Compound 53.**

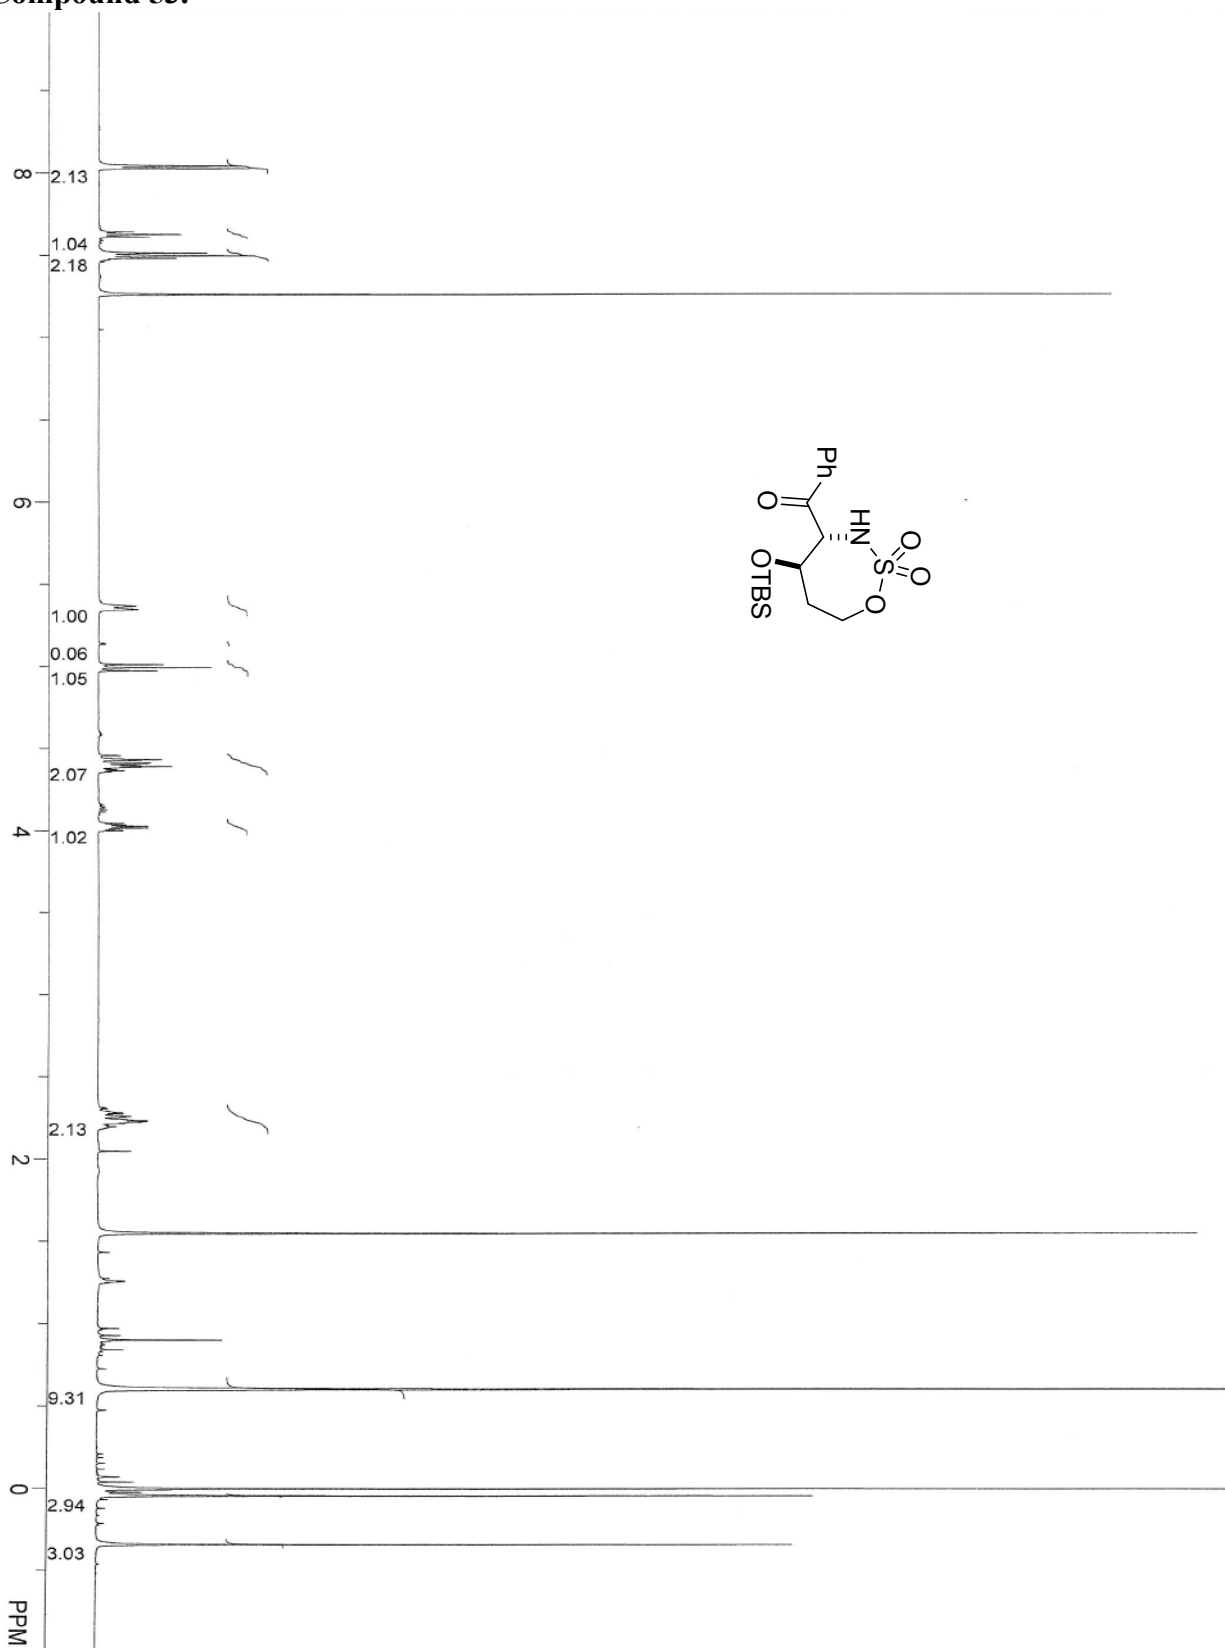

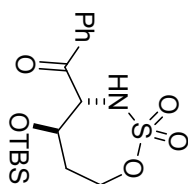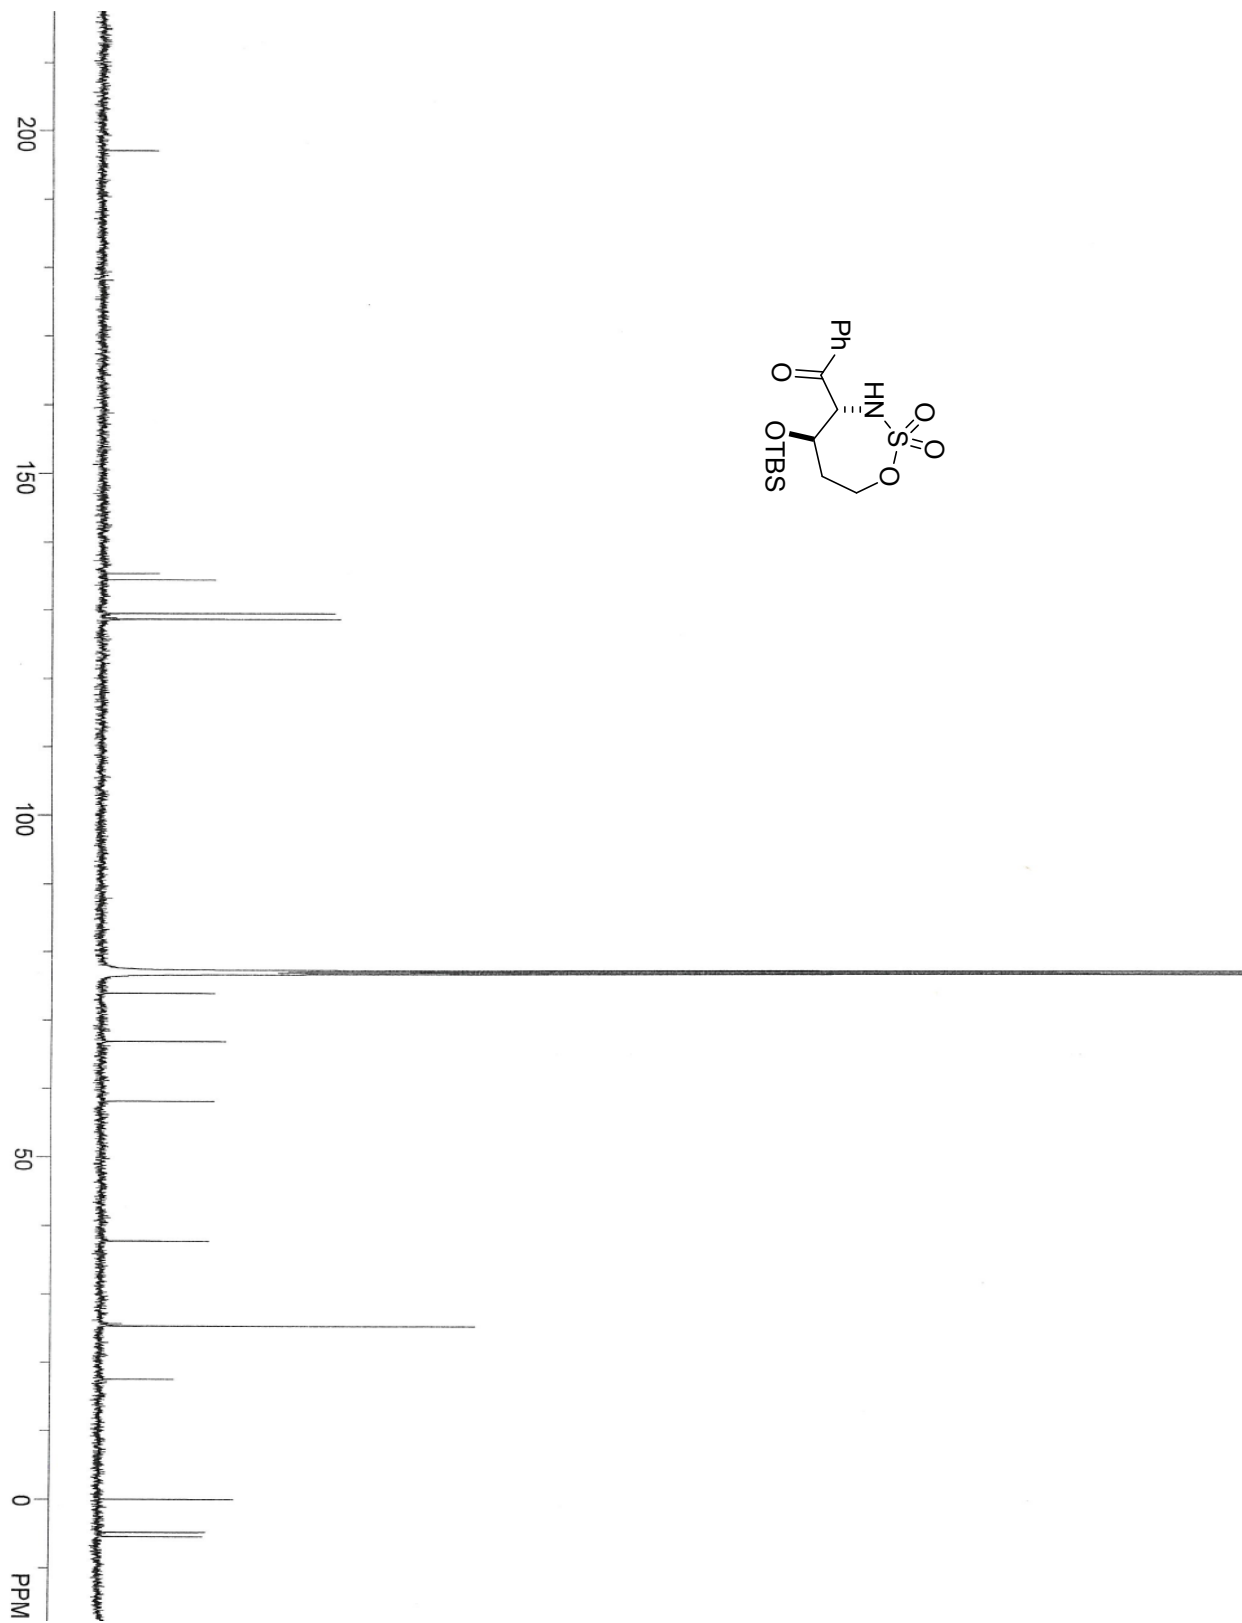



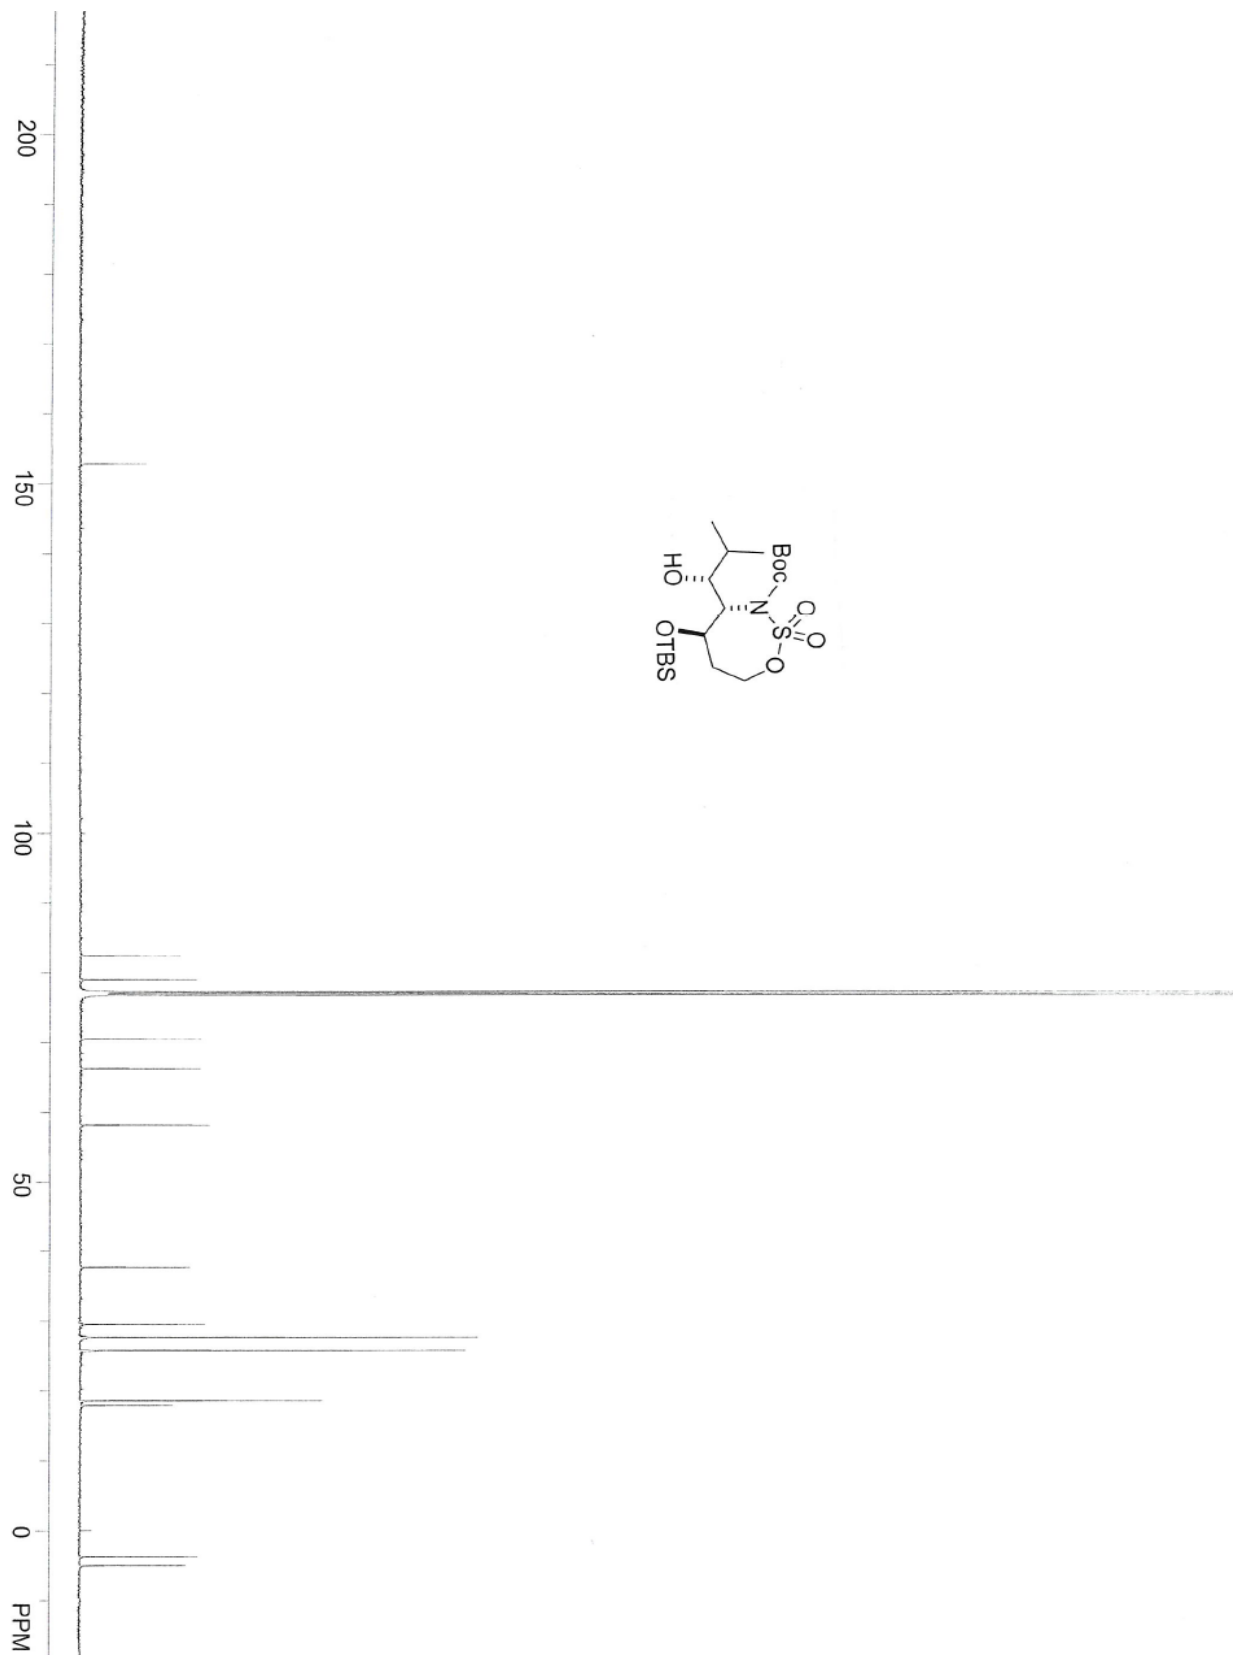

**Compound 55.**

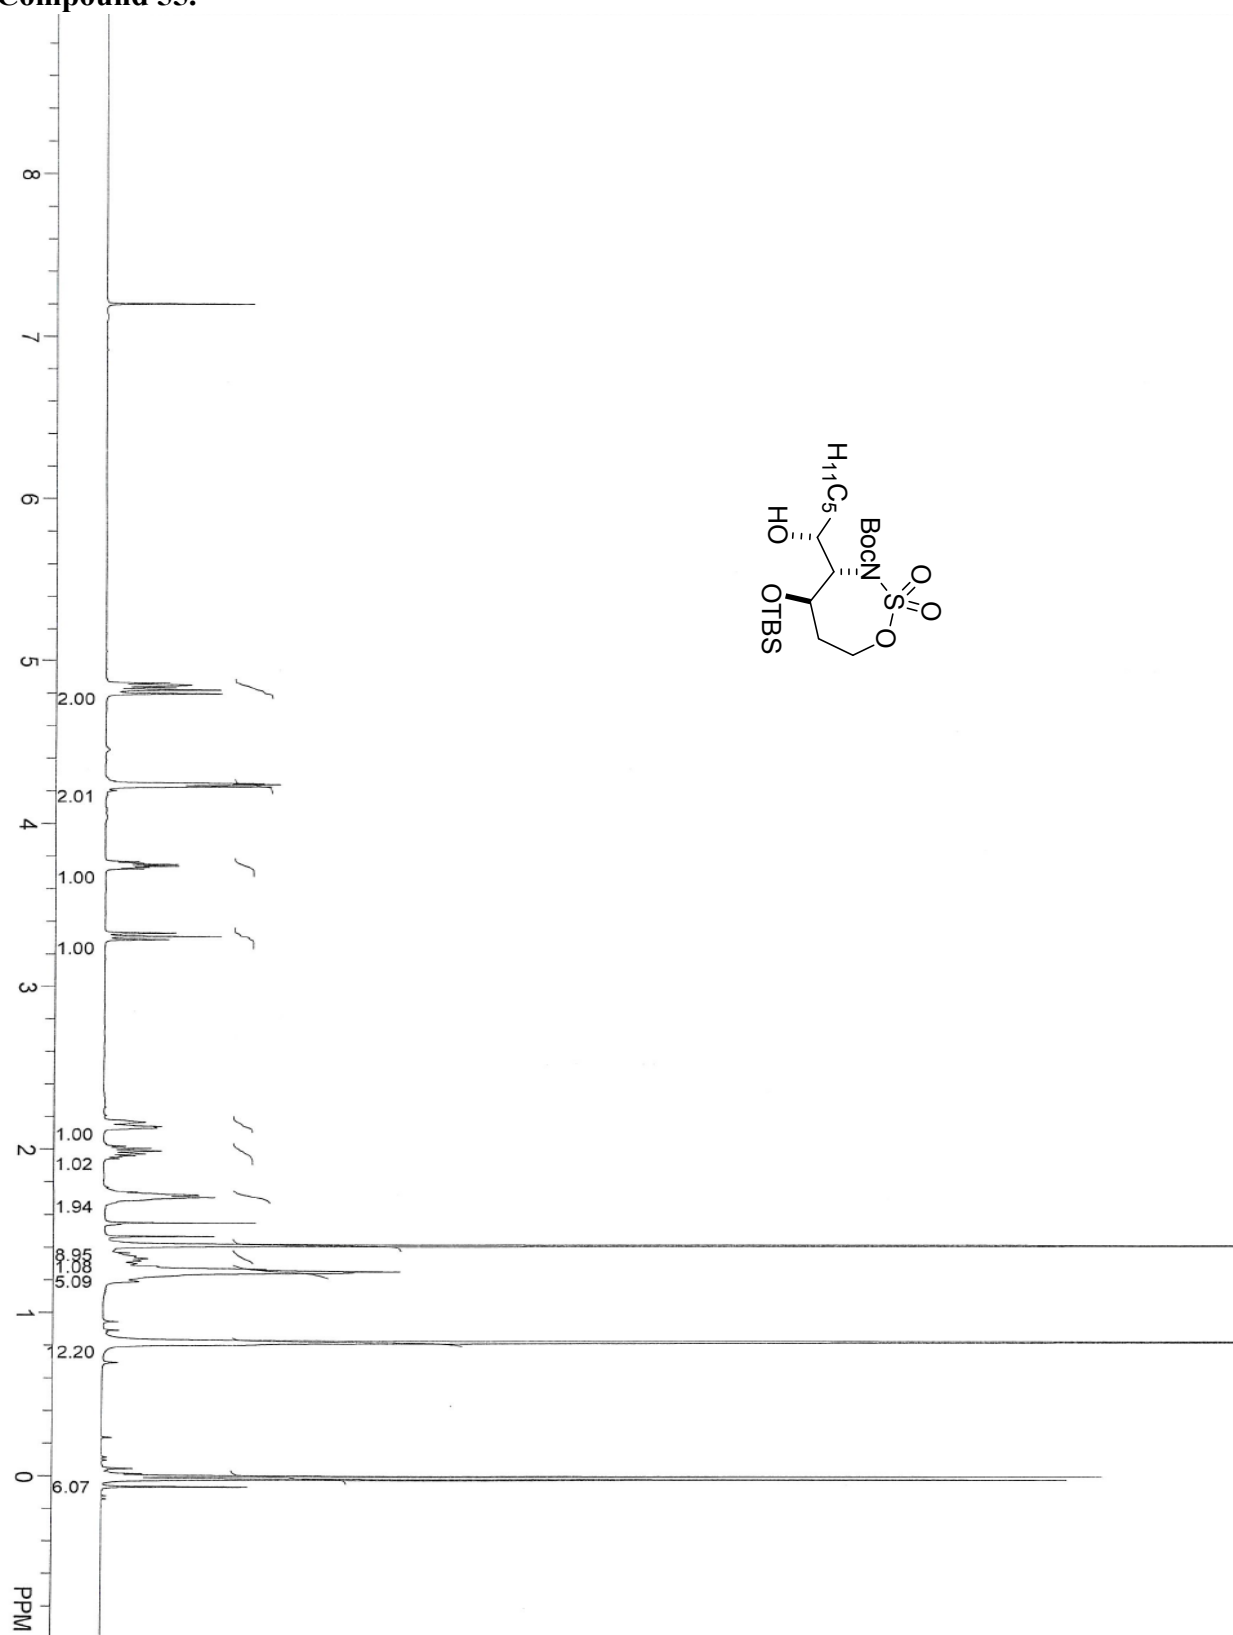



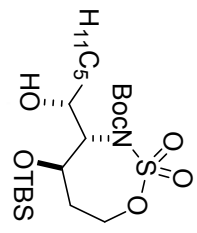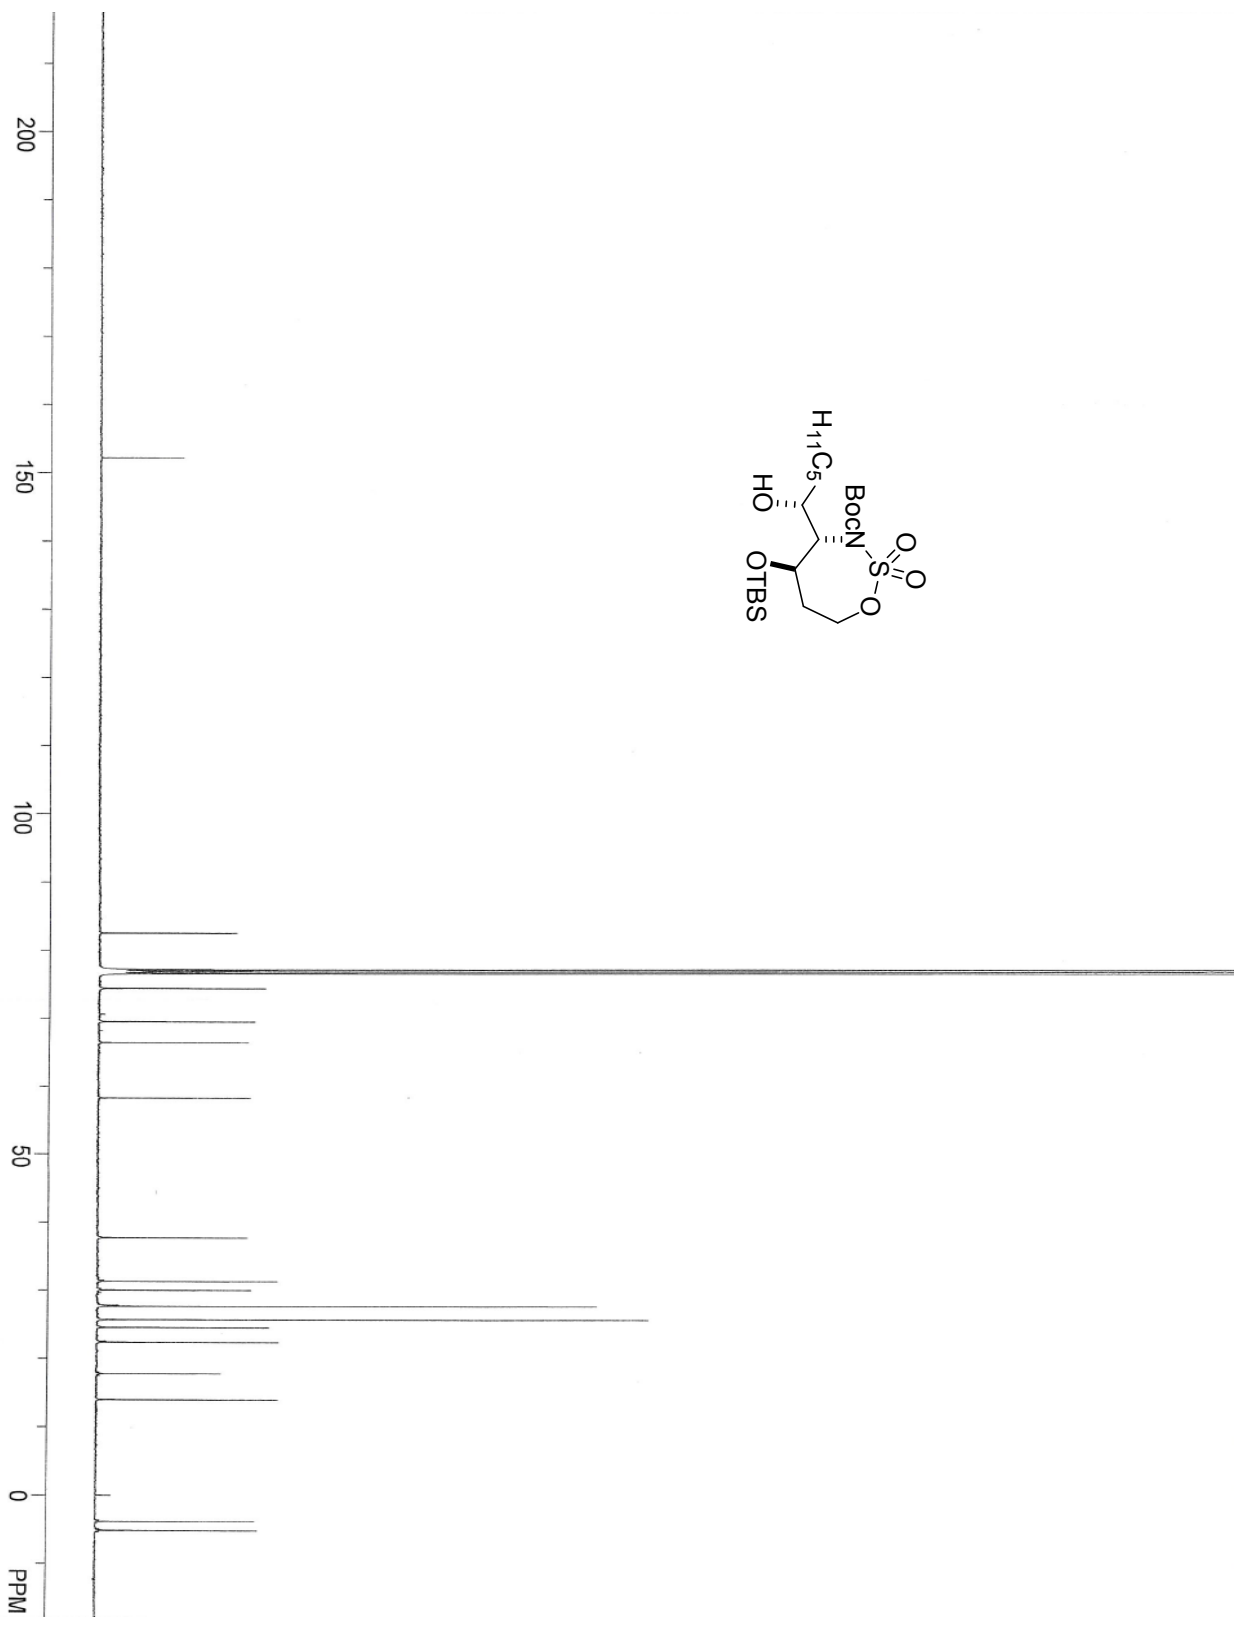

**Compound 56.**

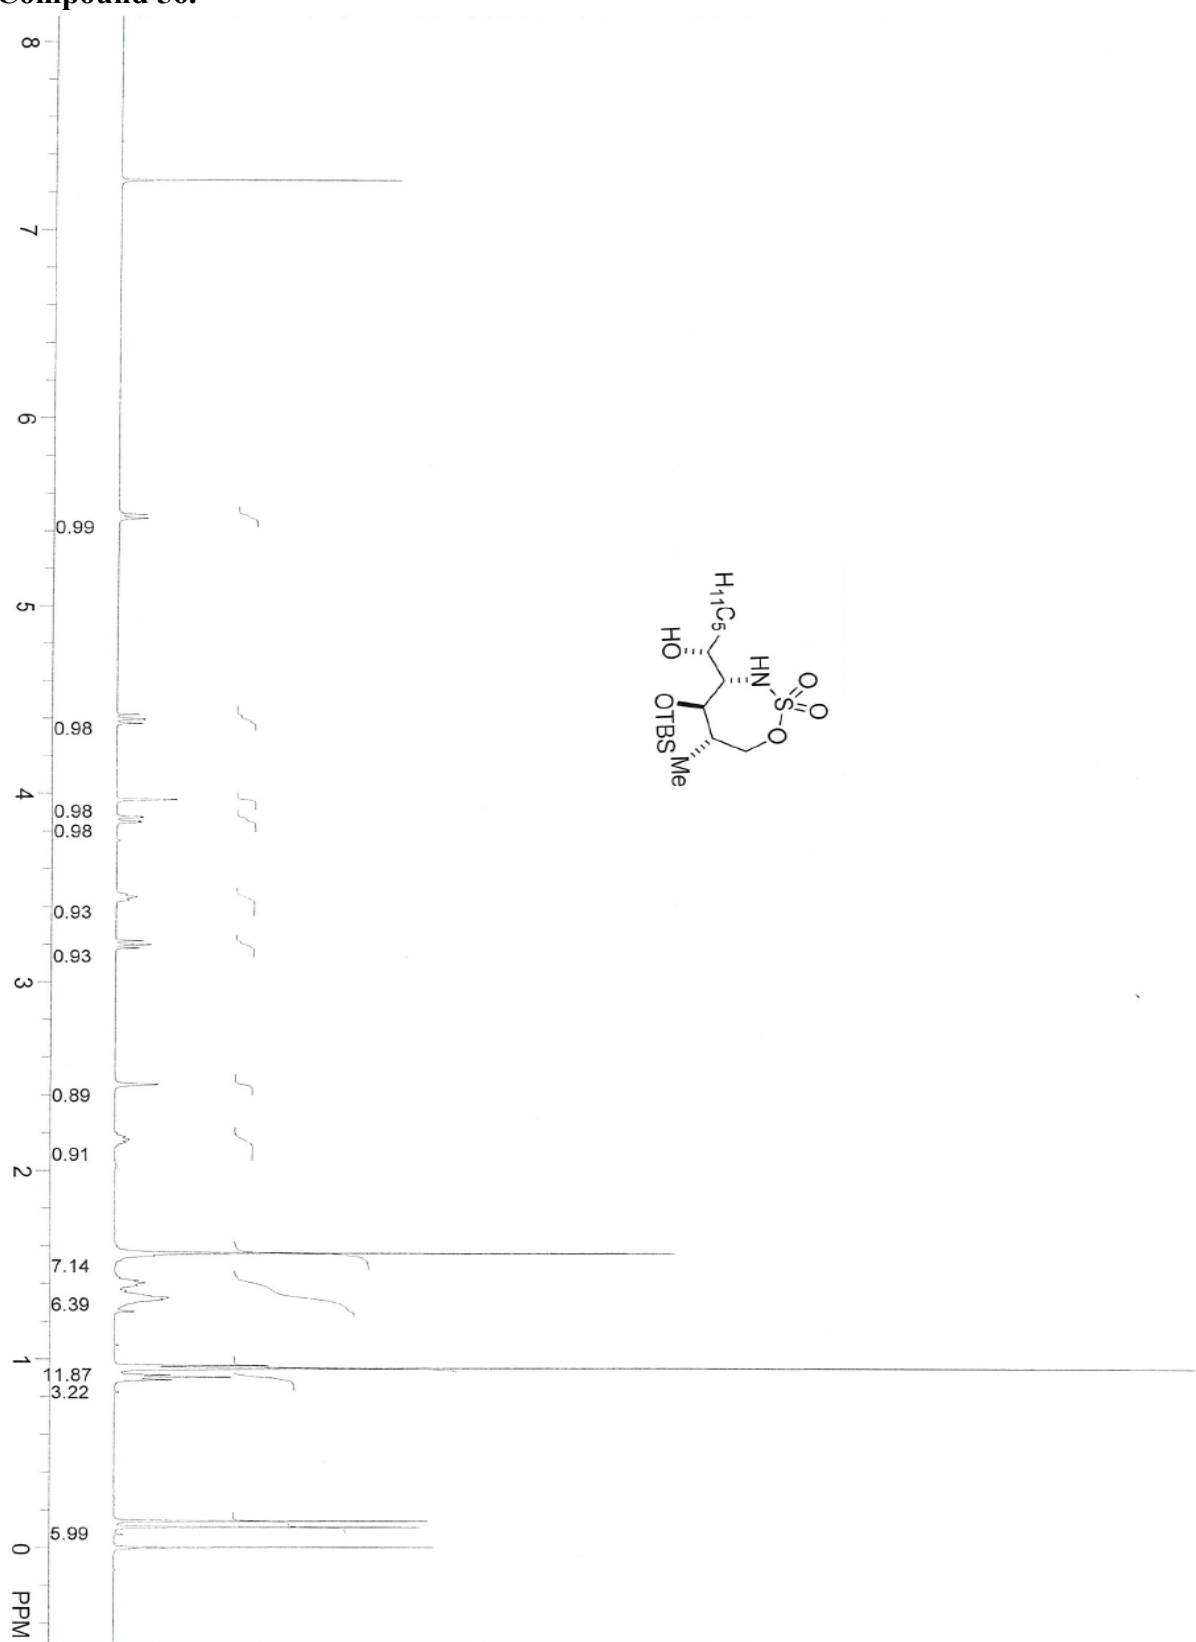

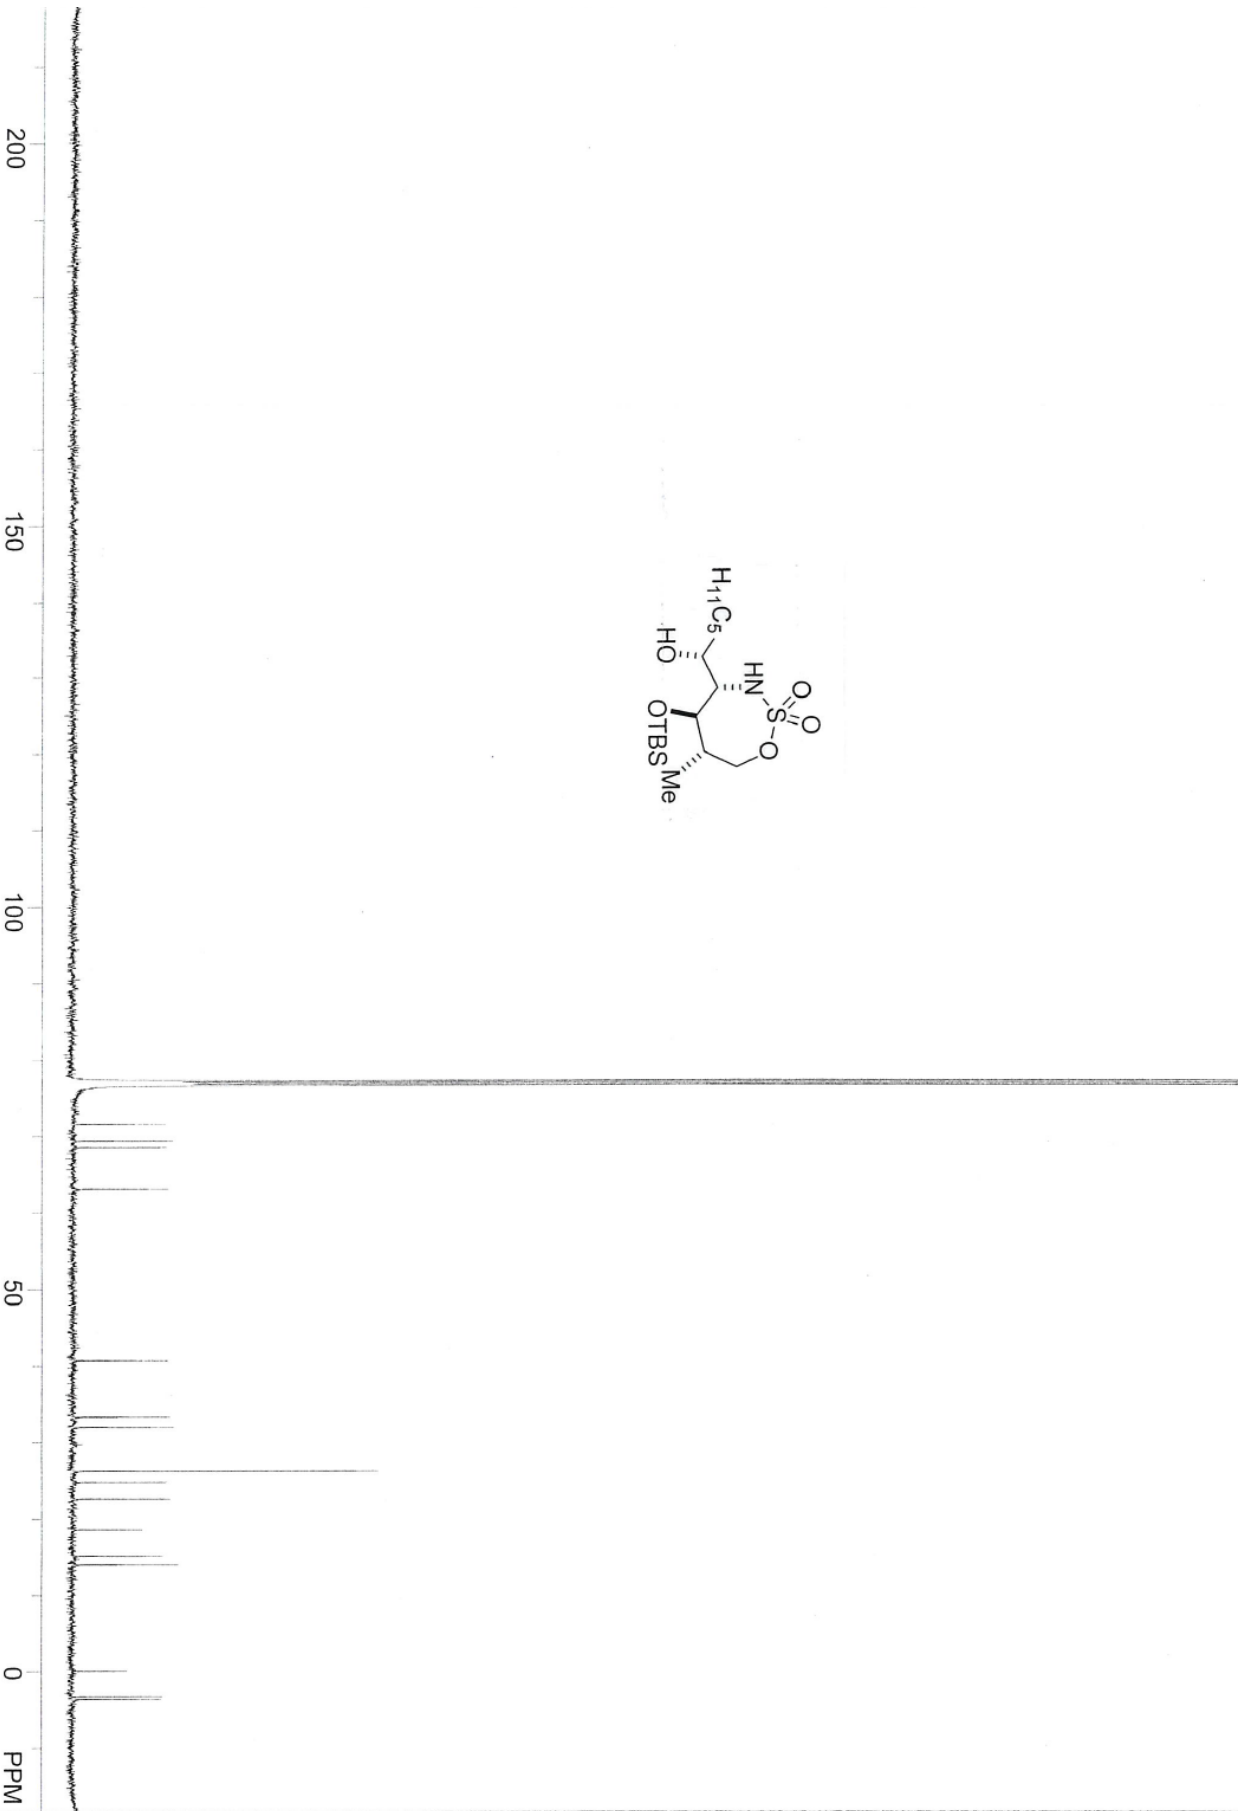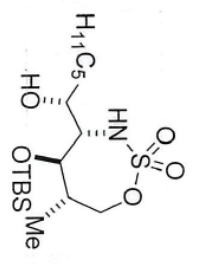

**Compound 57.**

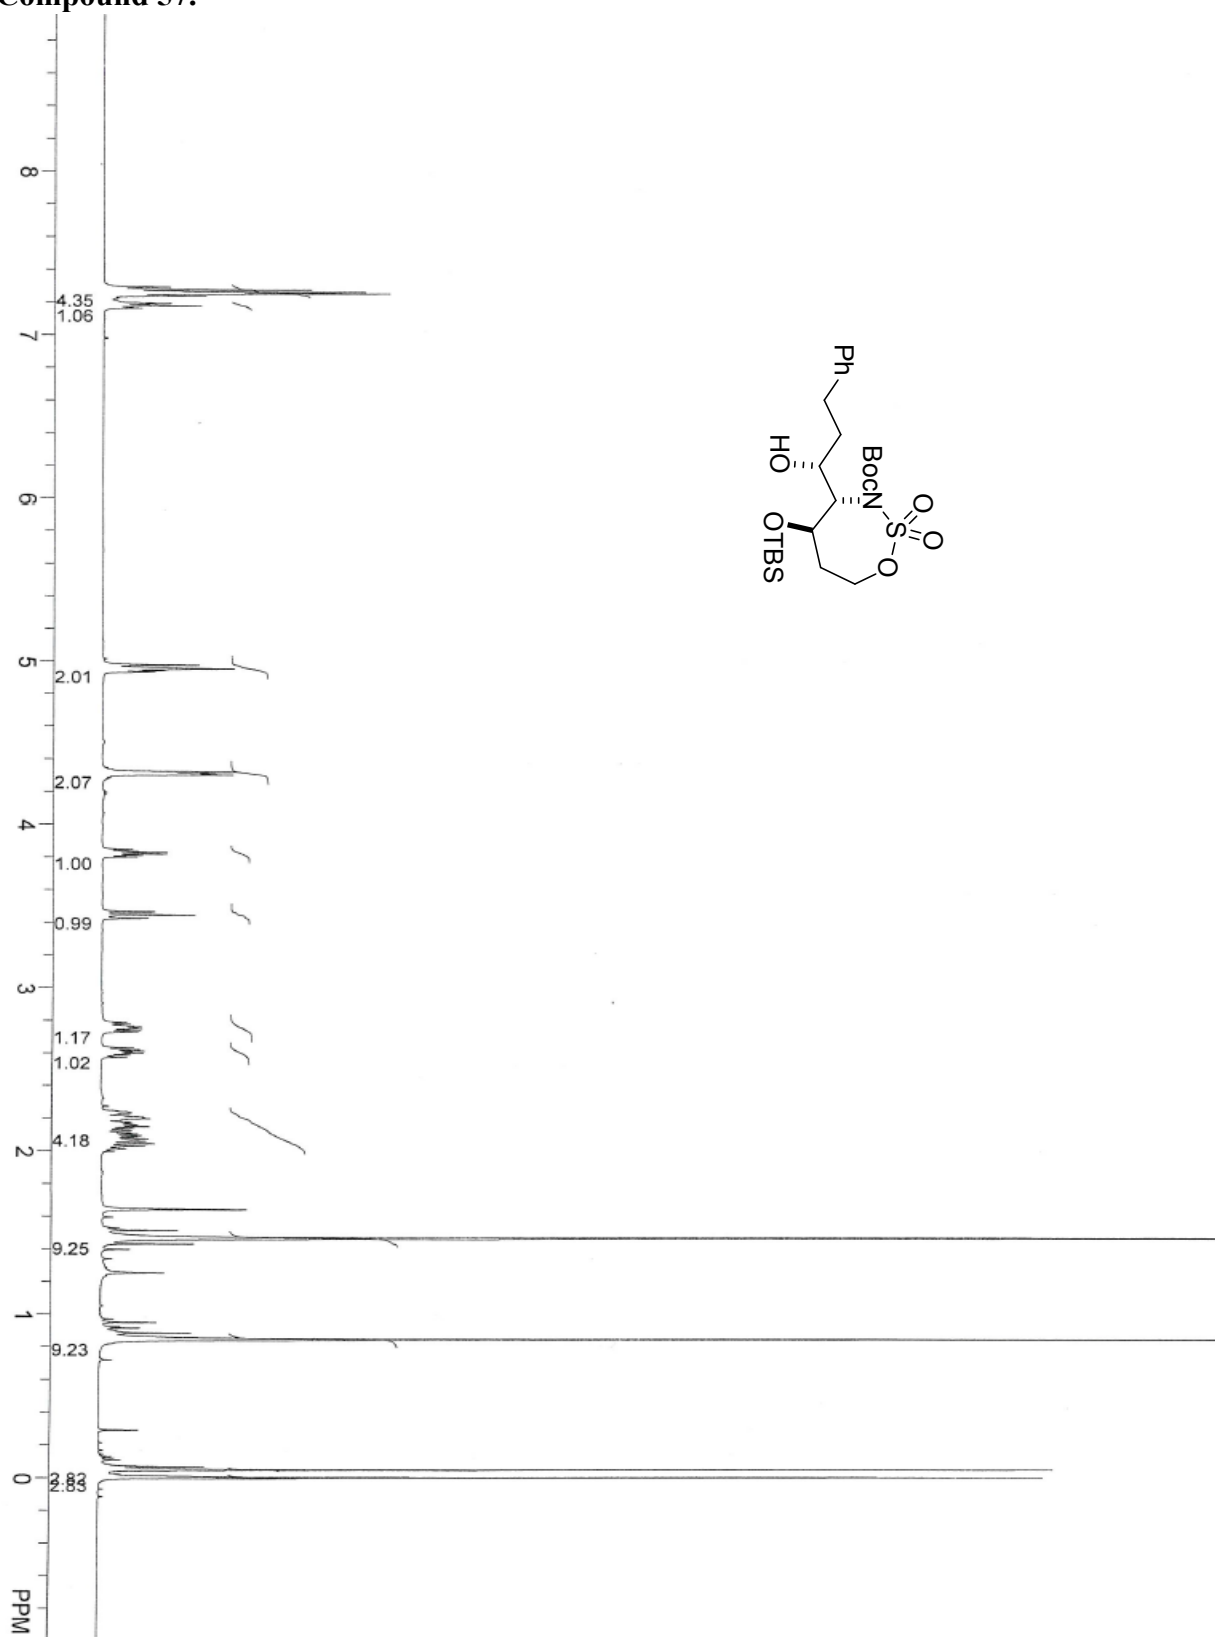

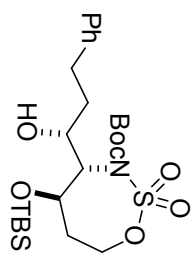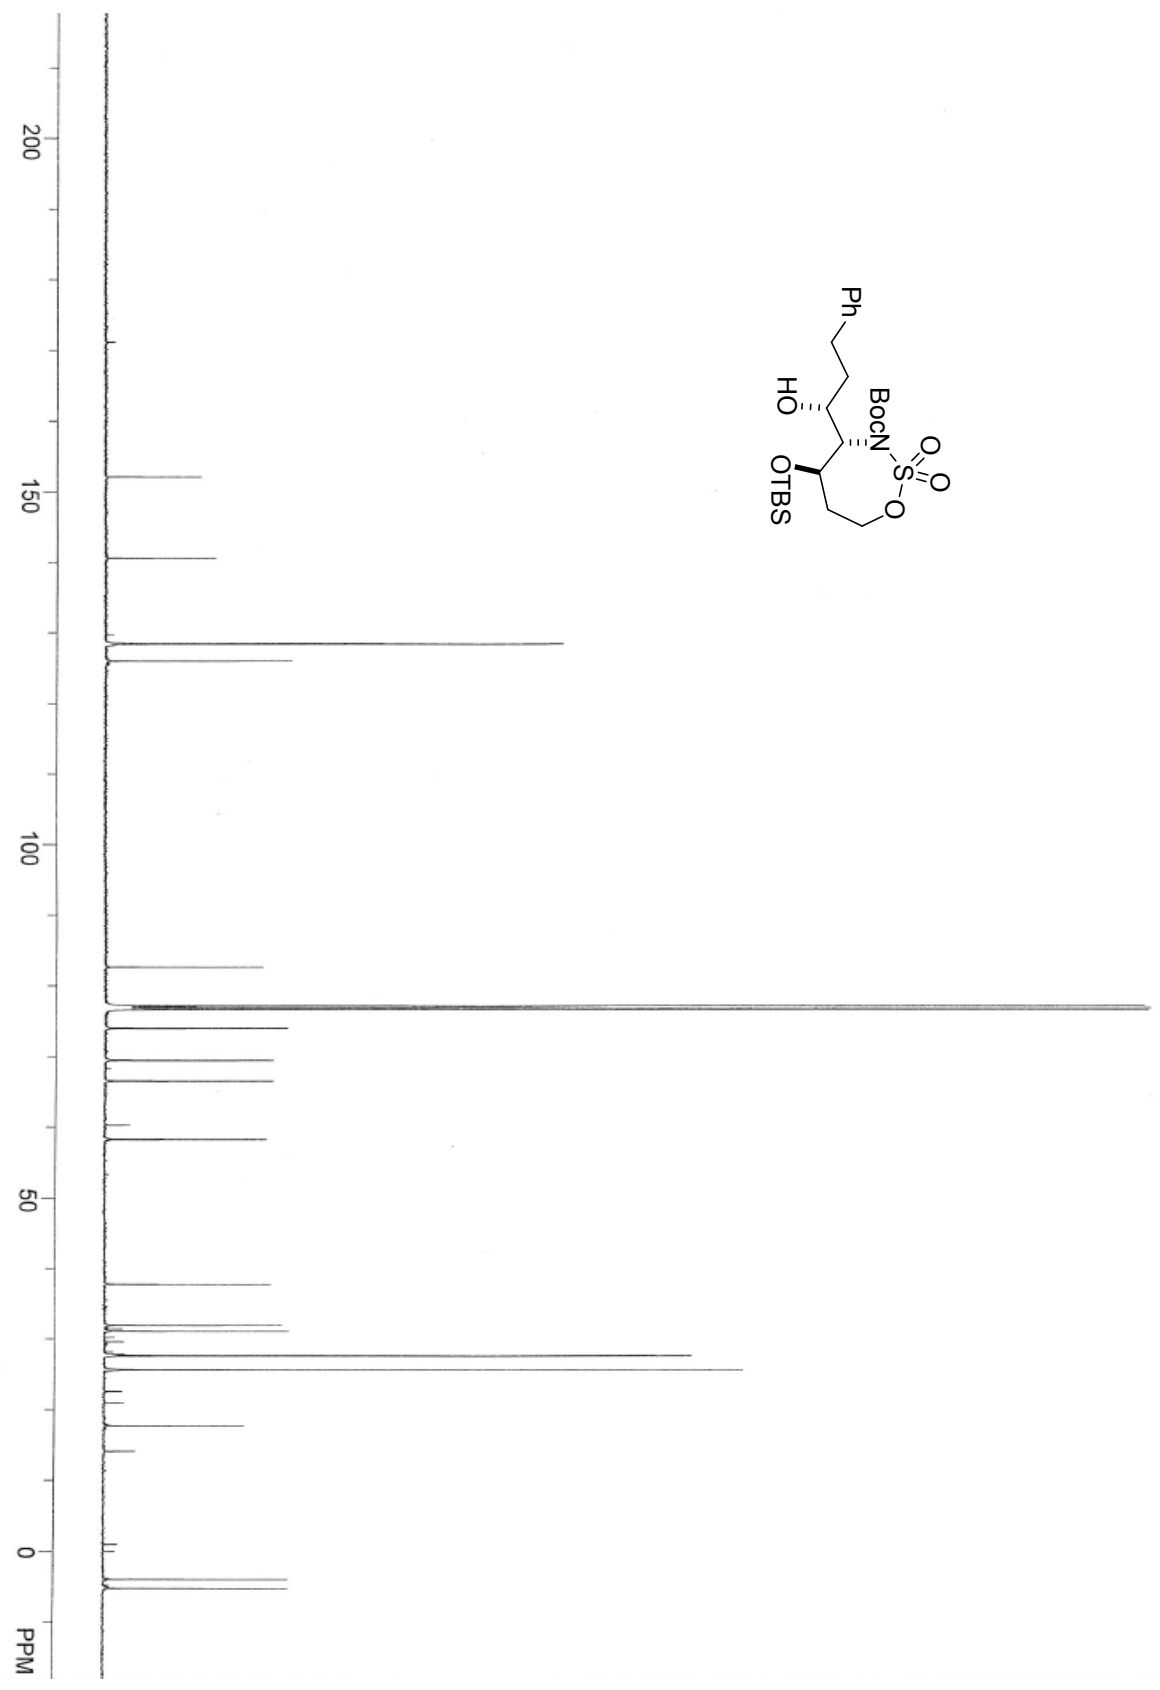

**Compound 58.**

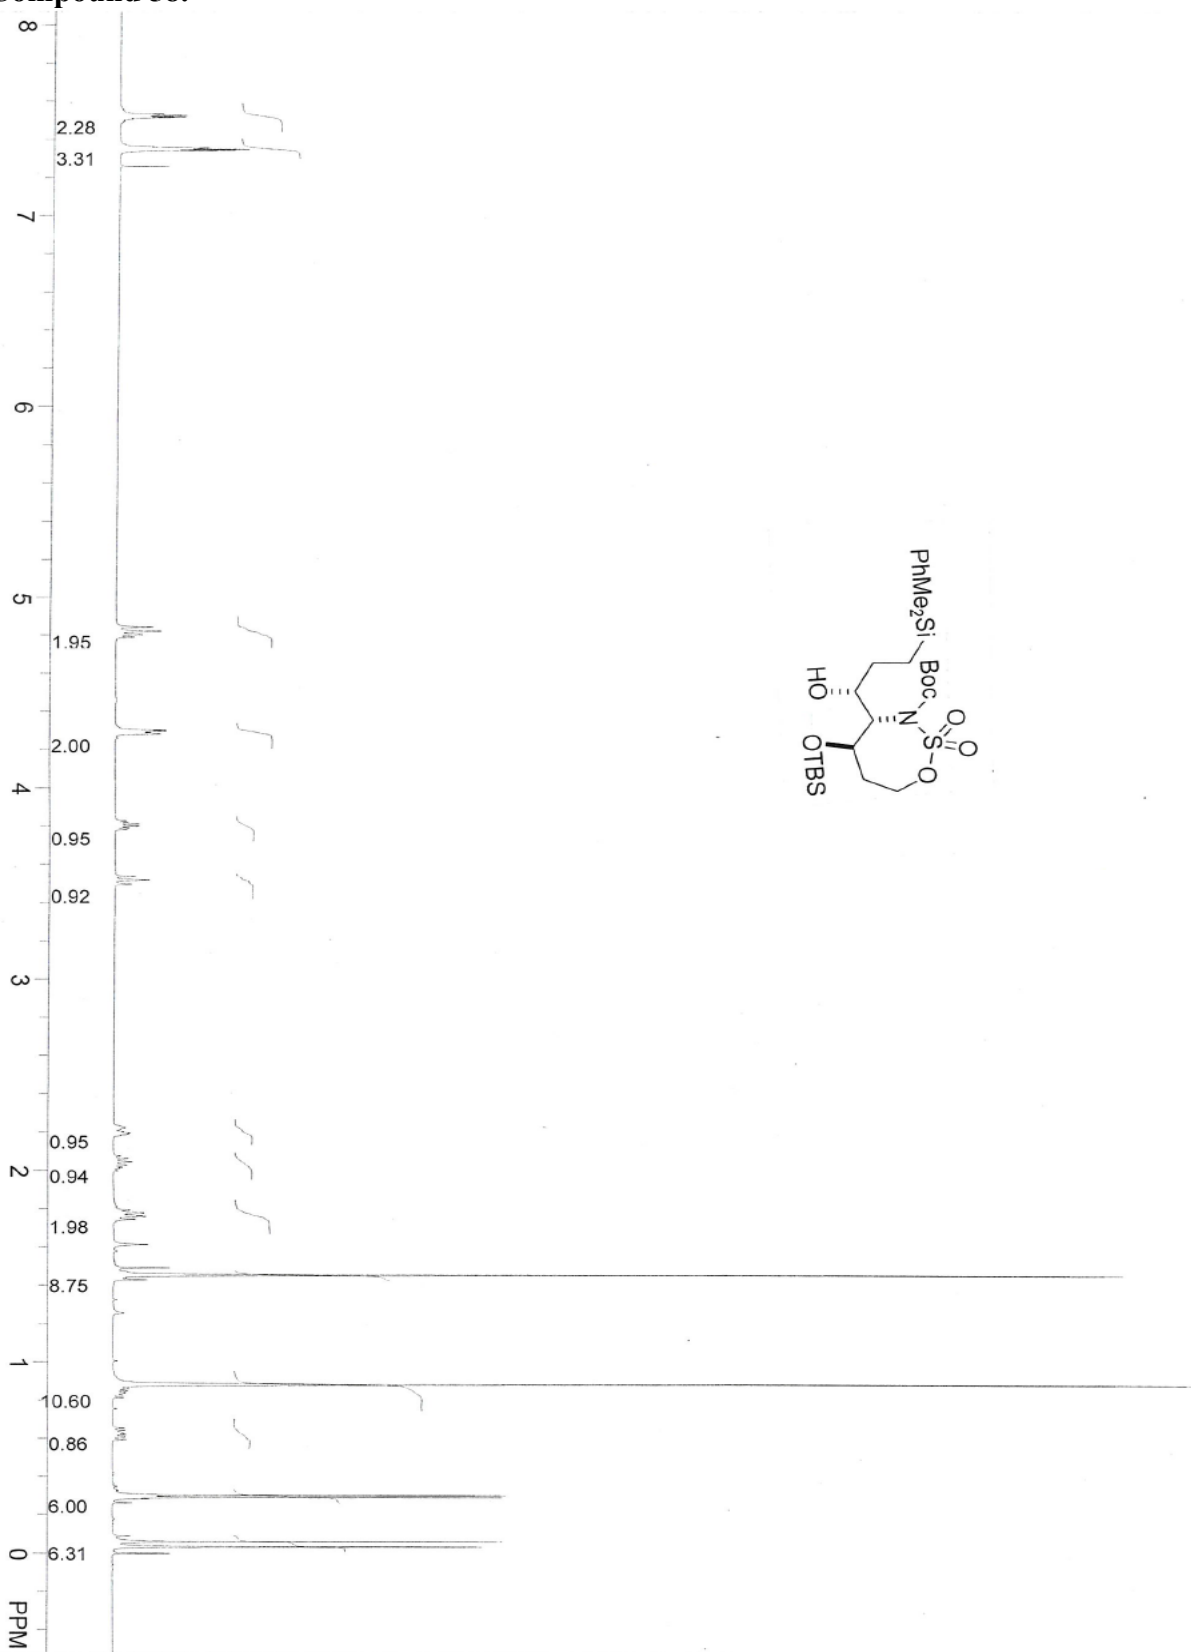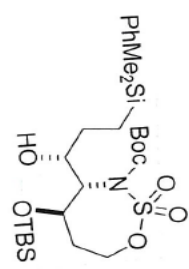

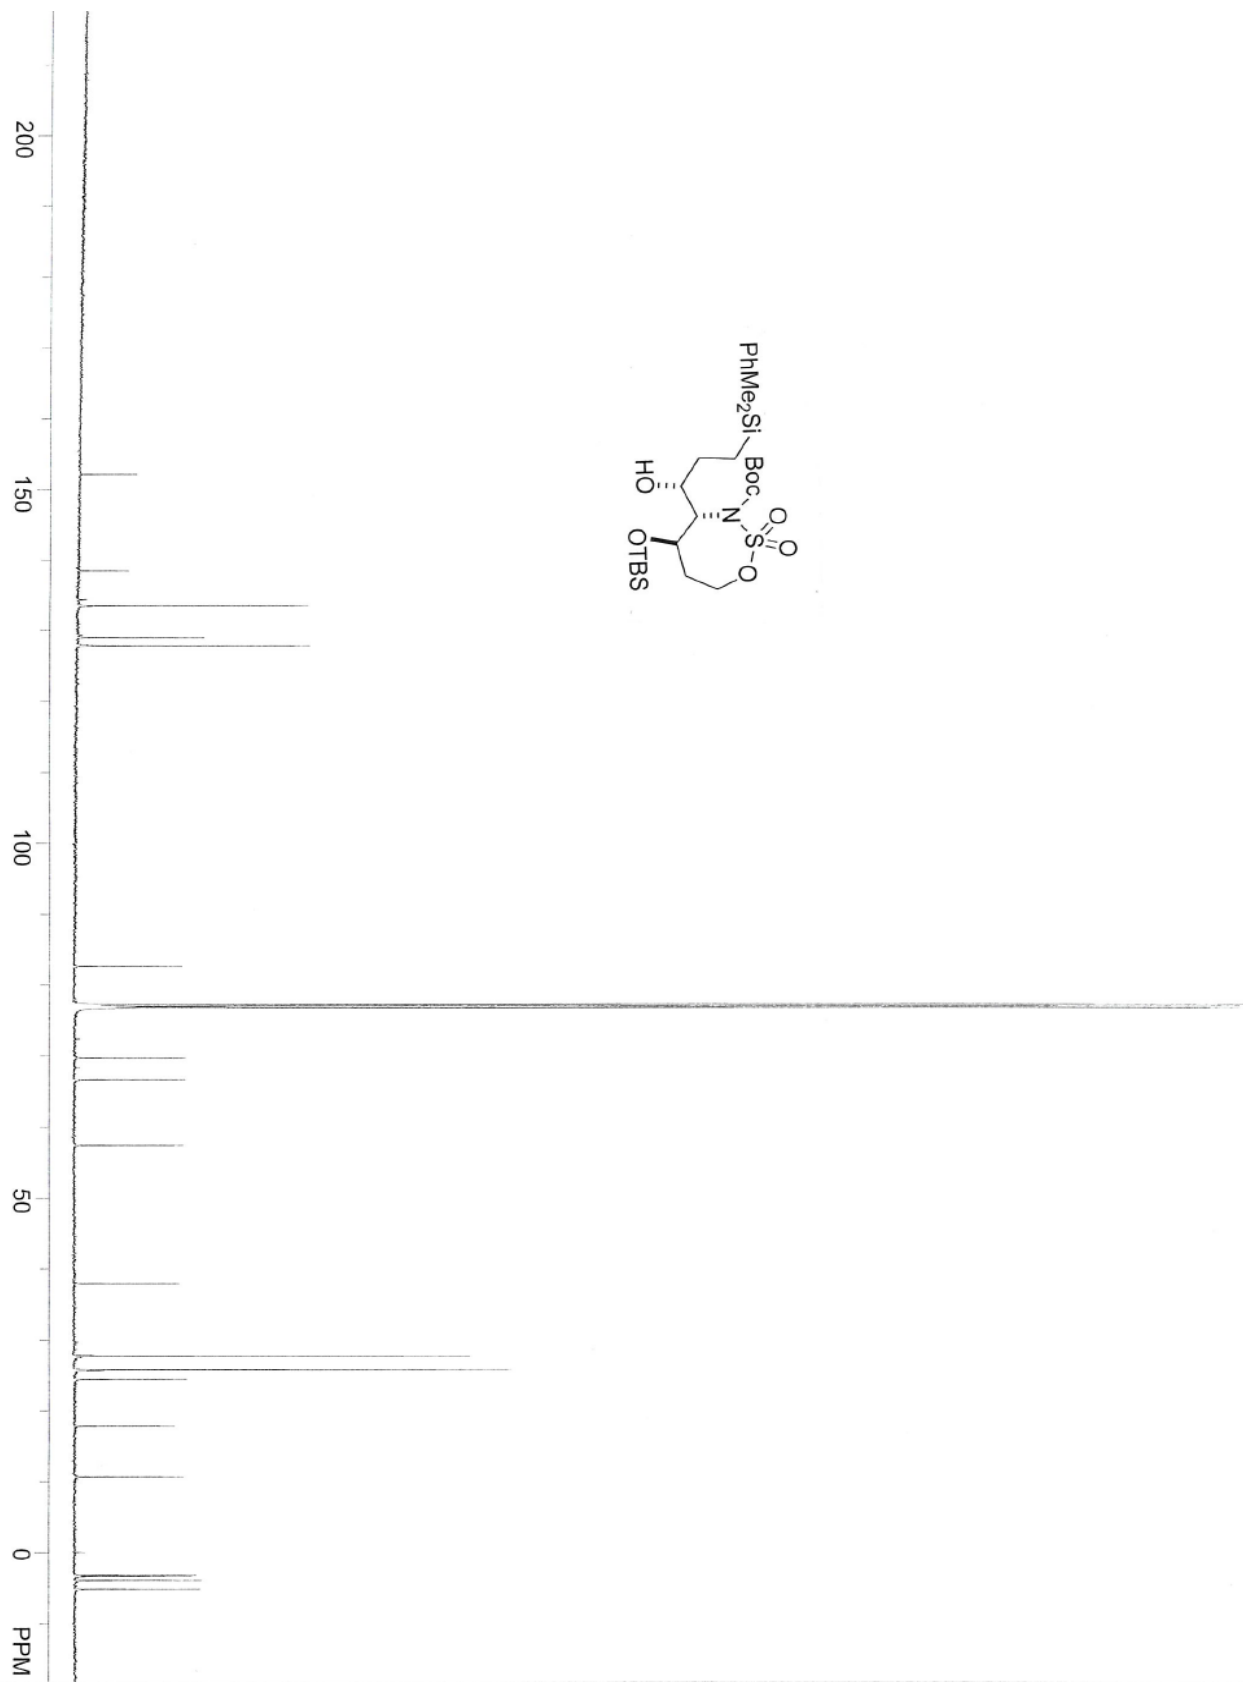

**Compound 58a.**

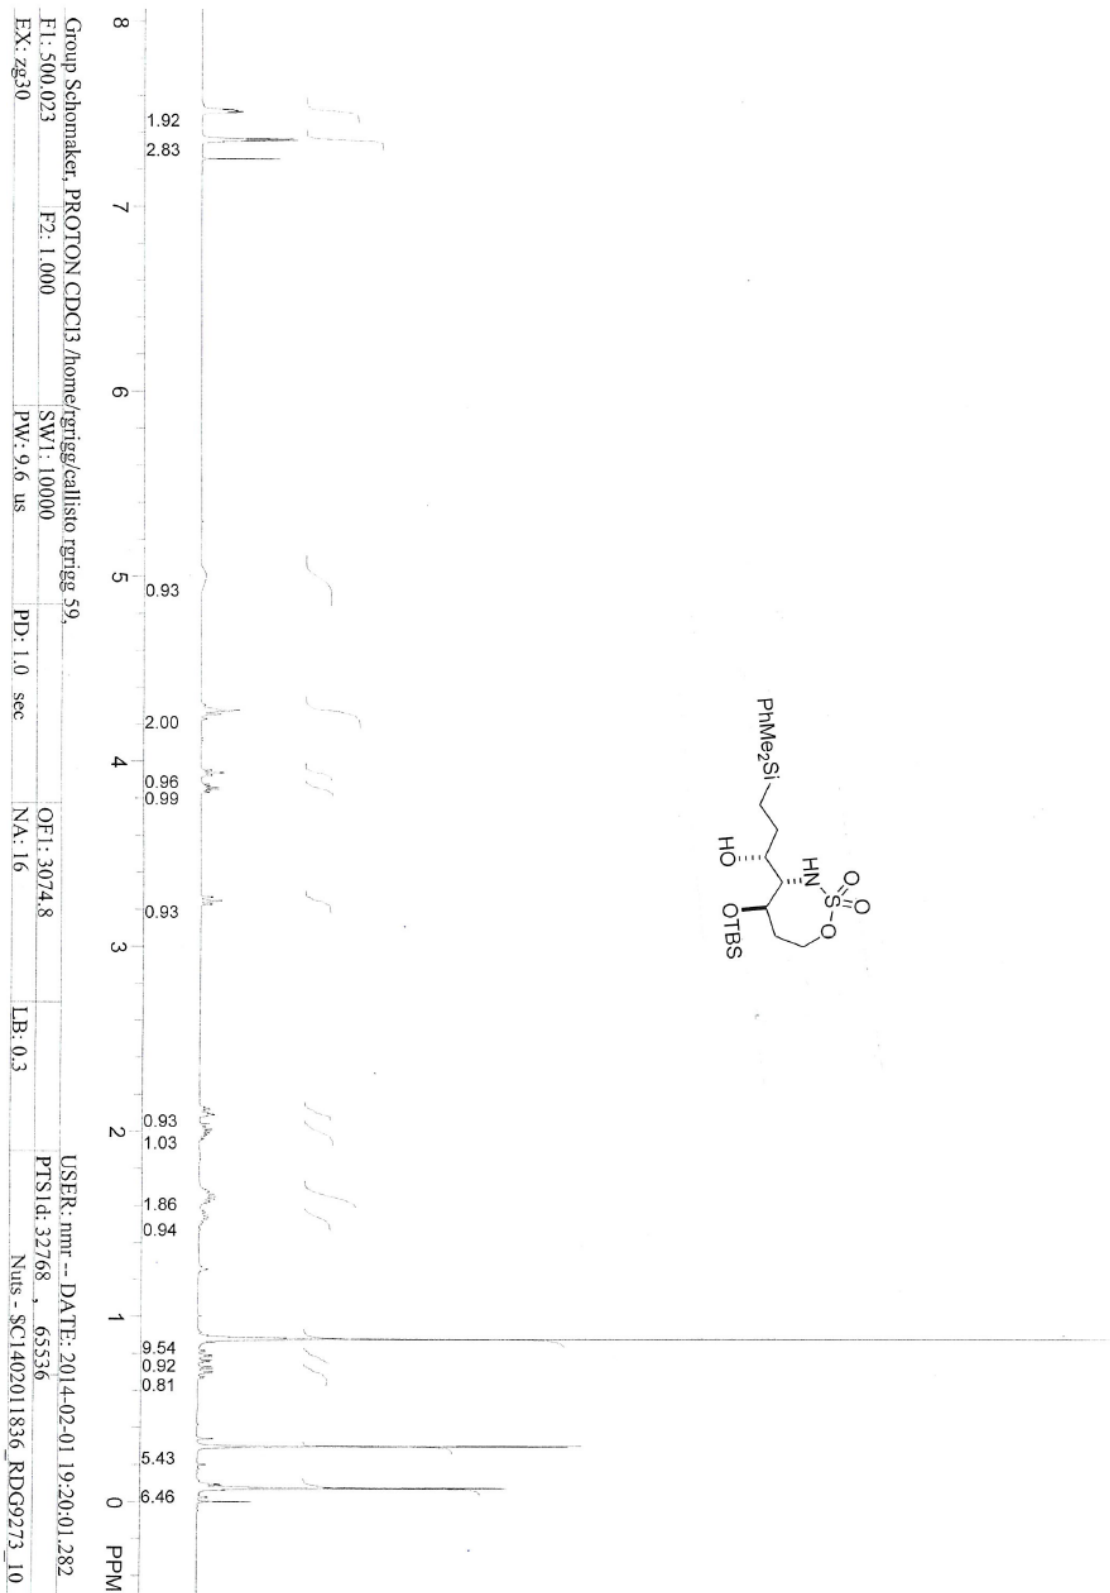



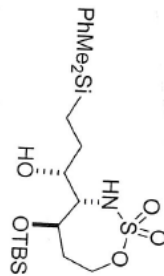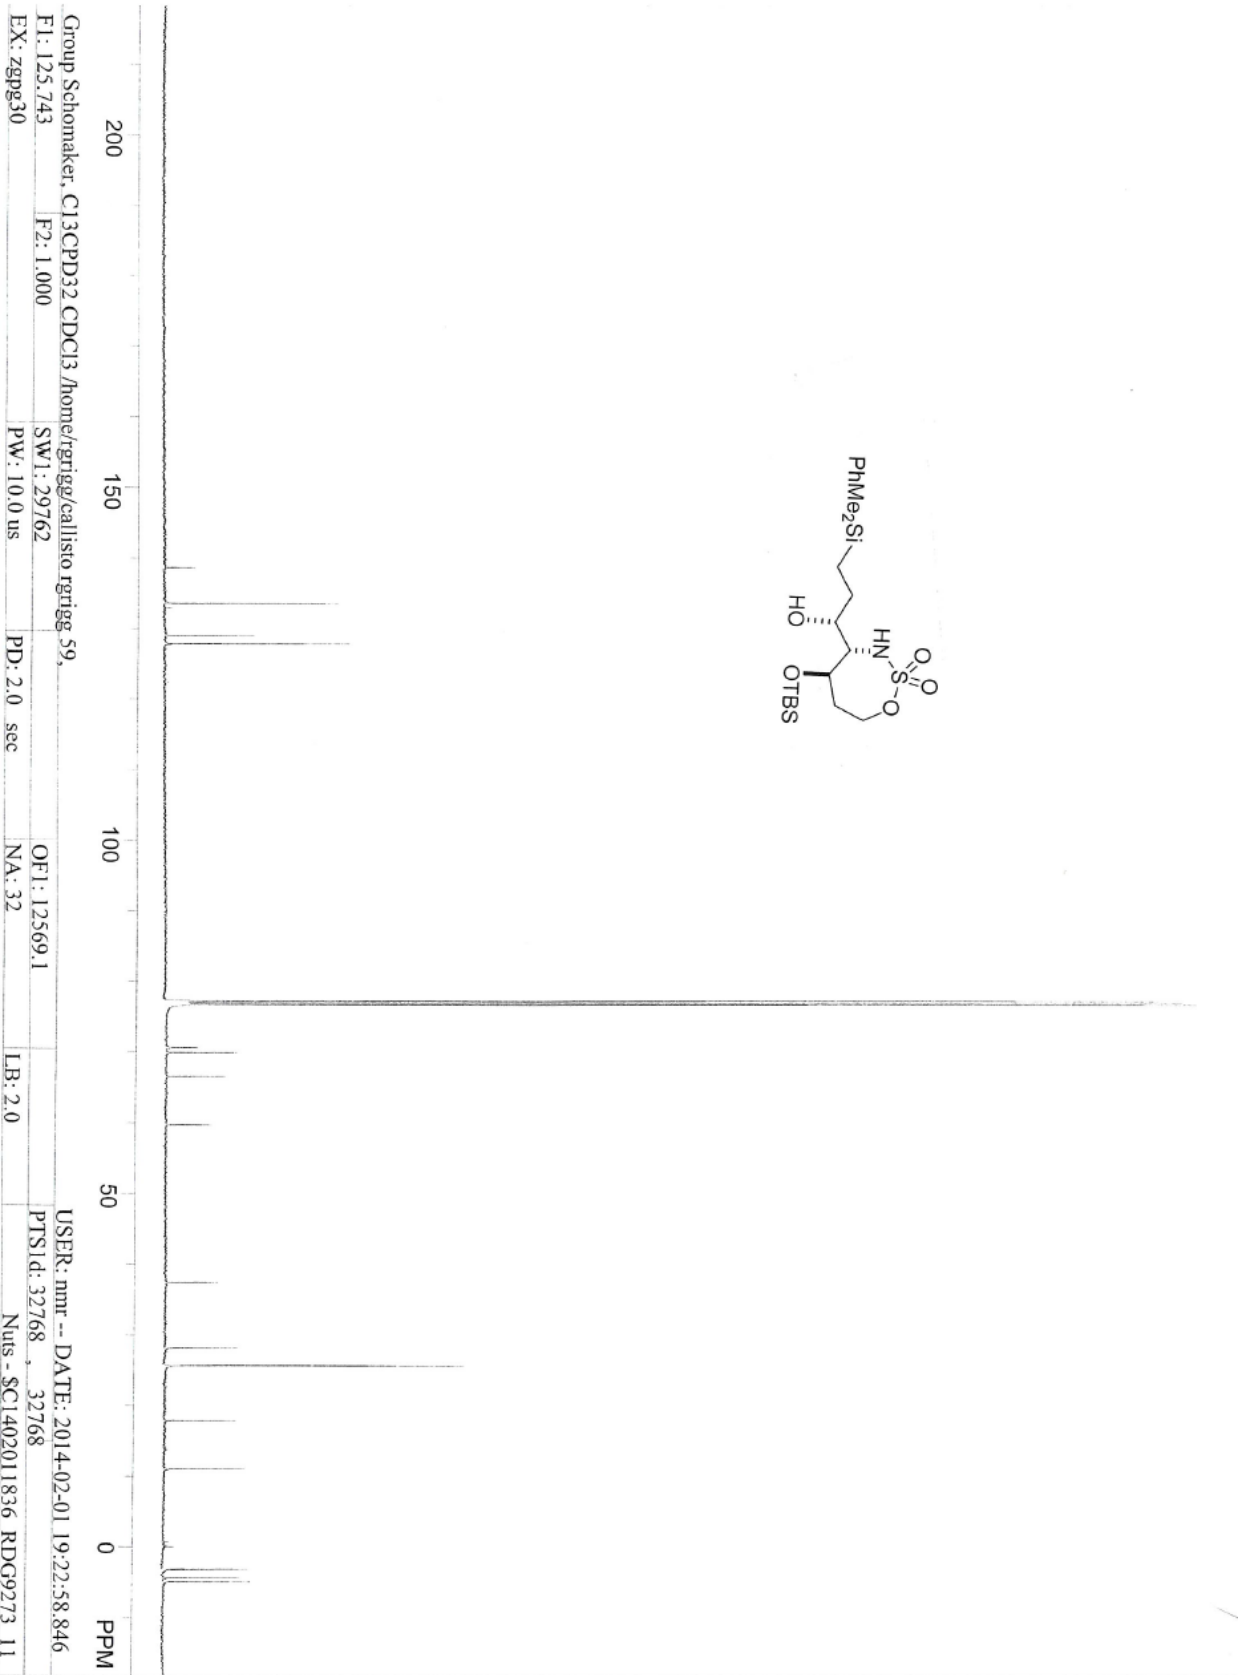

Group Schomaker: C13CPD32 CDCl3 /home/rgigg/callisto rgigg 59,  
 F1: 125.743 F2: 1.000 SW1: 29762  
 EX: zspg30 PW: 10.0 us PD: 2.0 sec NA: 32 OF1: 12569.1 LB: 2.0  
 USER: mmr -- DATE: 2014-02-01 19:22:58.846  
 PTSID: 32768 32768  
 Nuts - \$C1402011836\_RDG9273\_11

Compound 59.

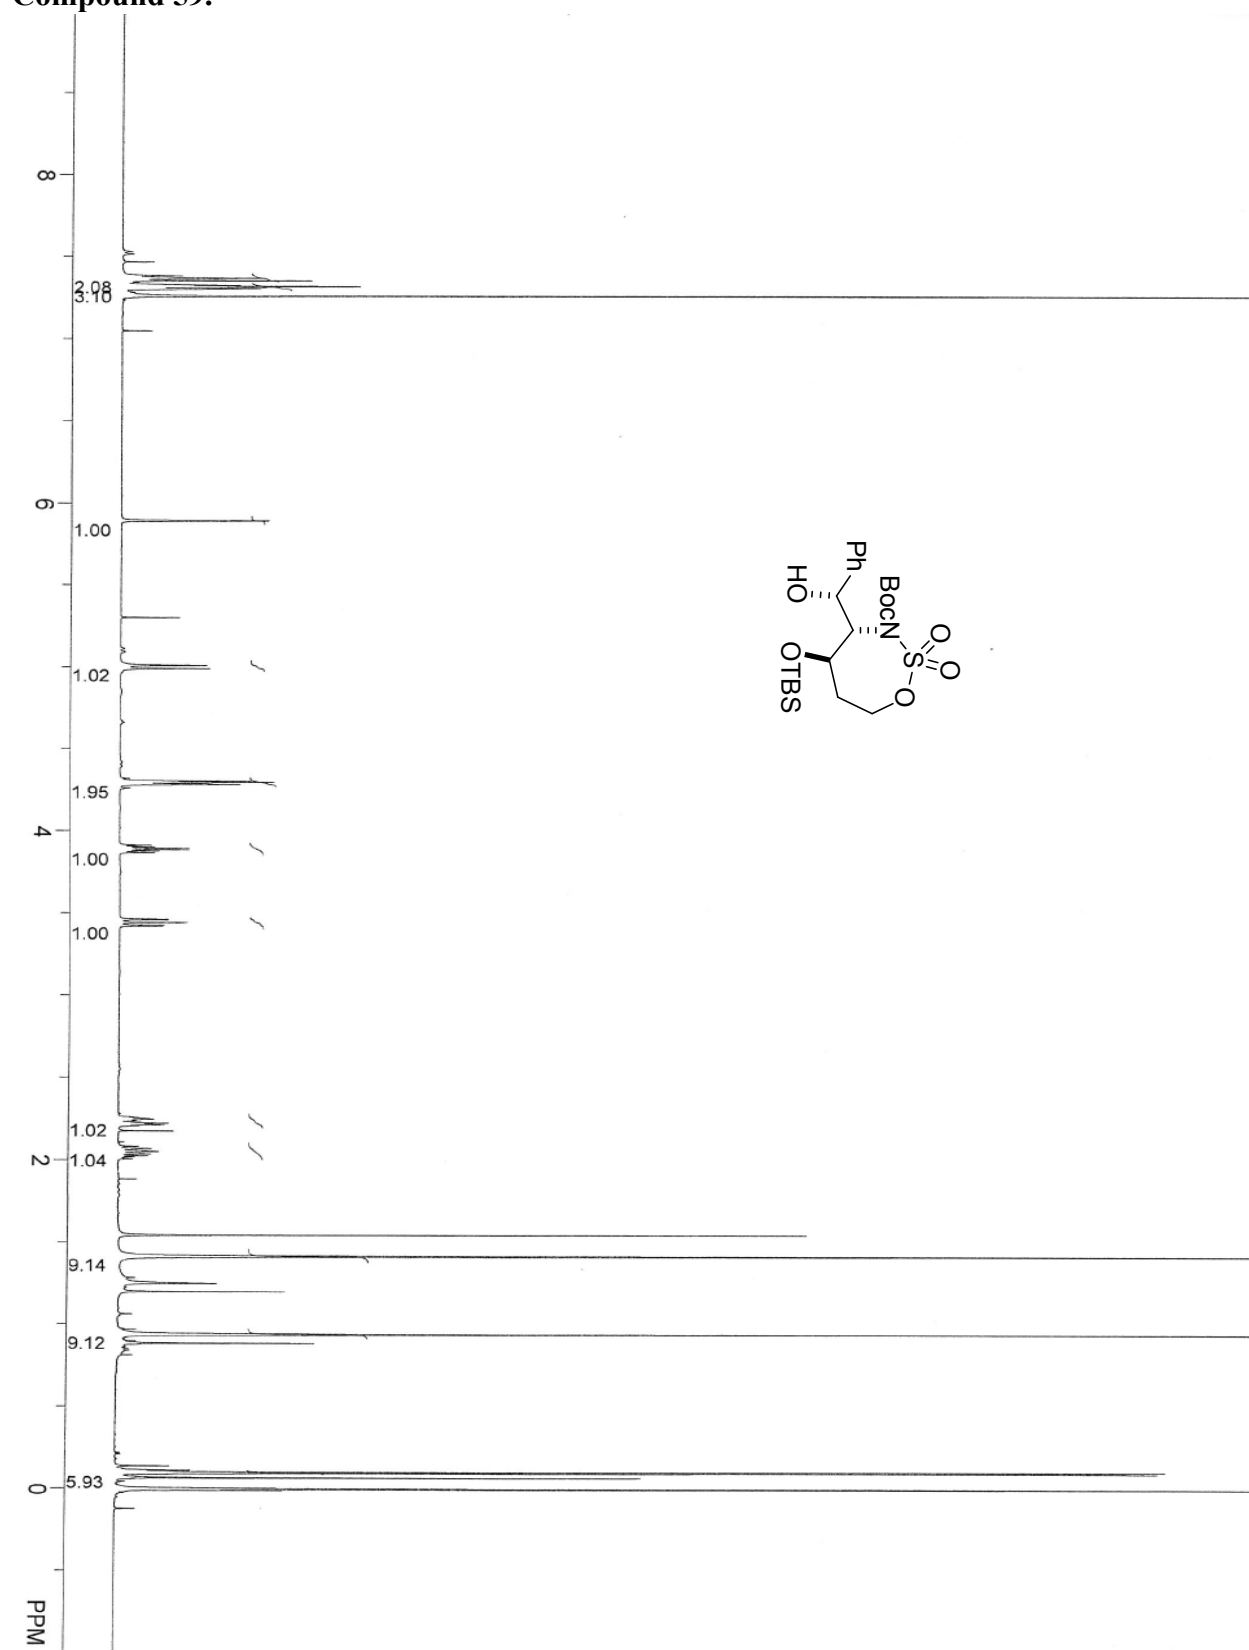

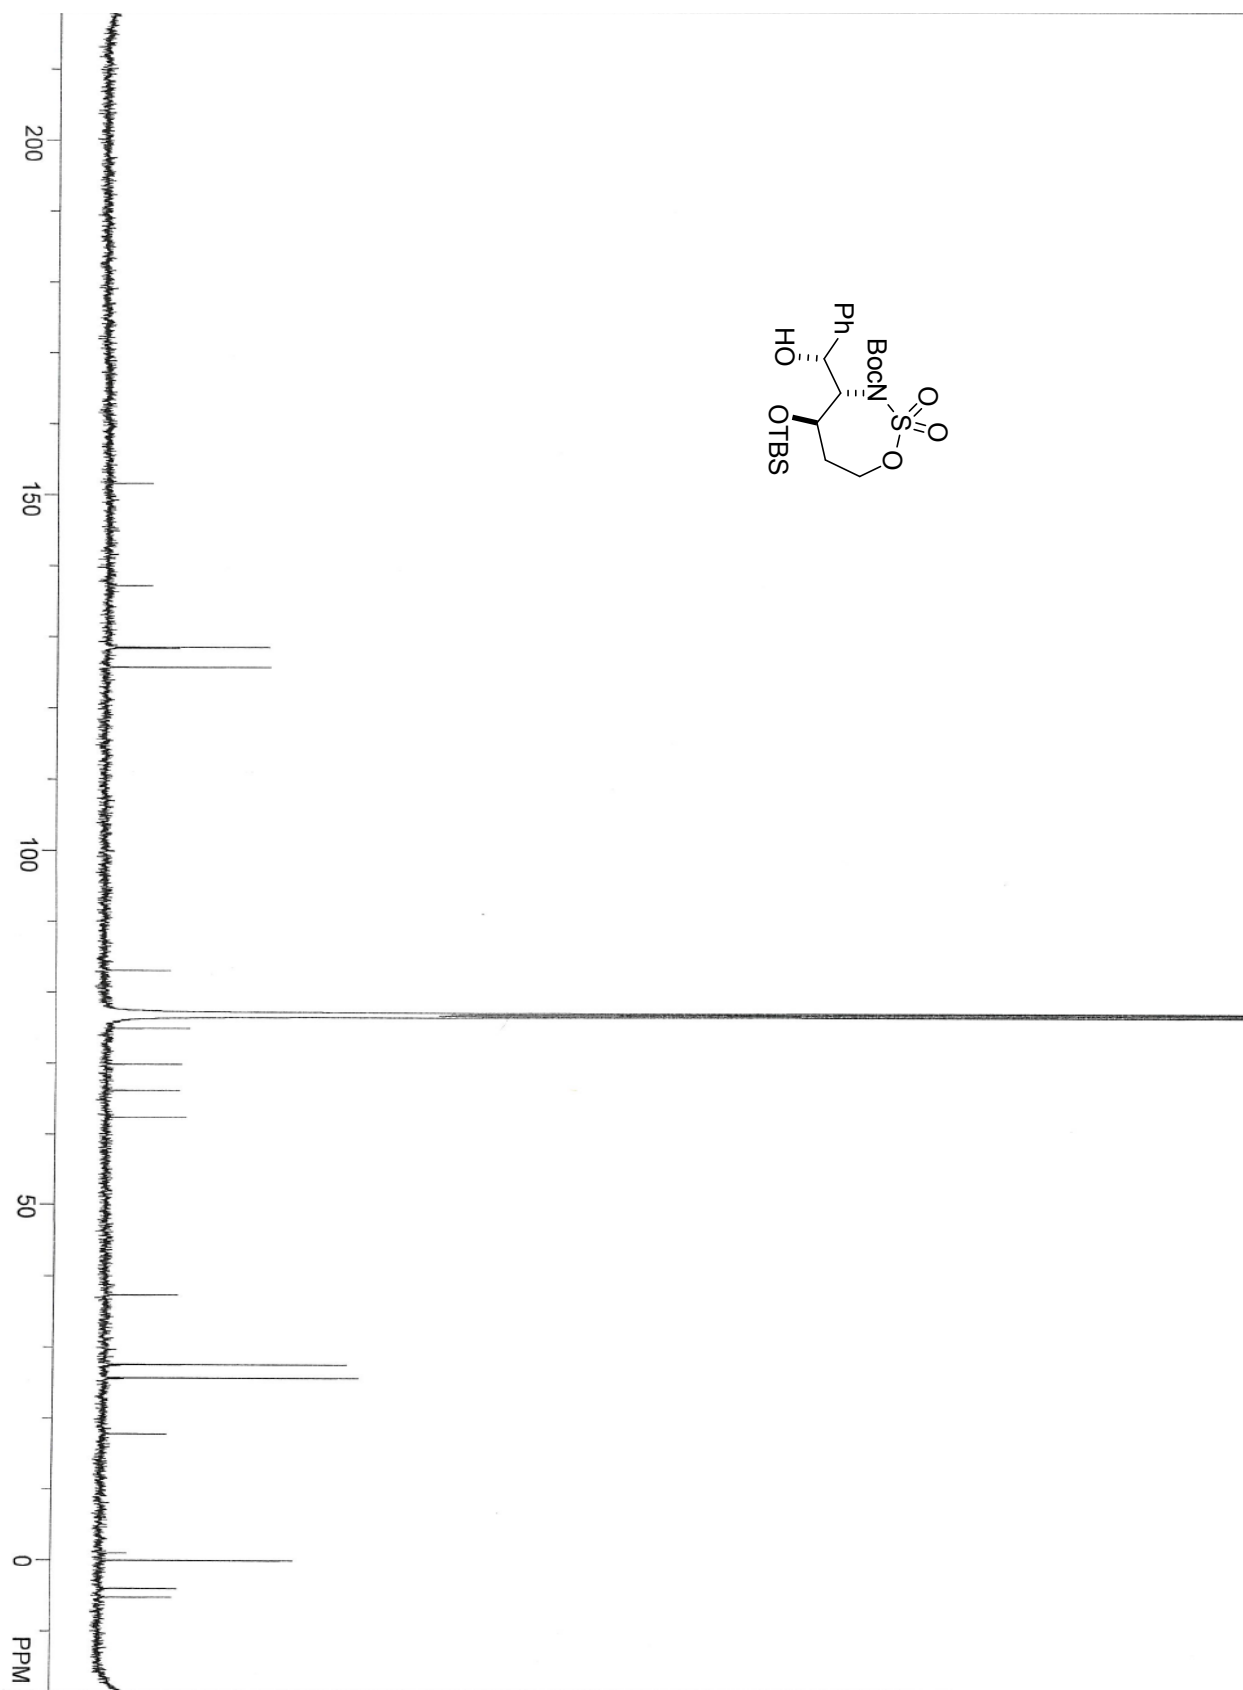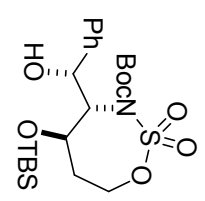

**Compound 60.**

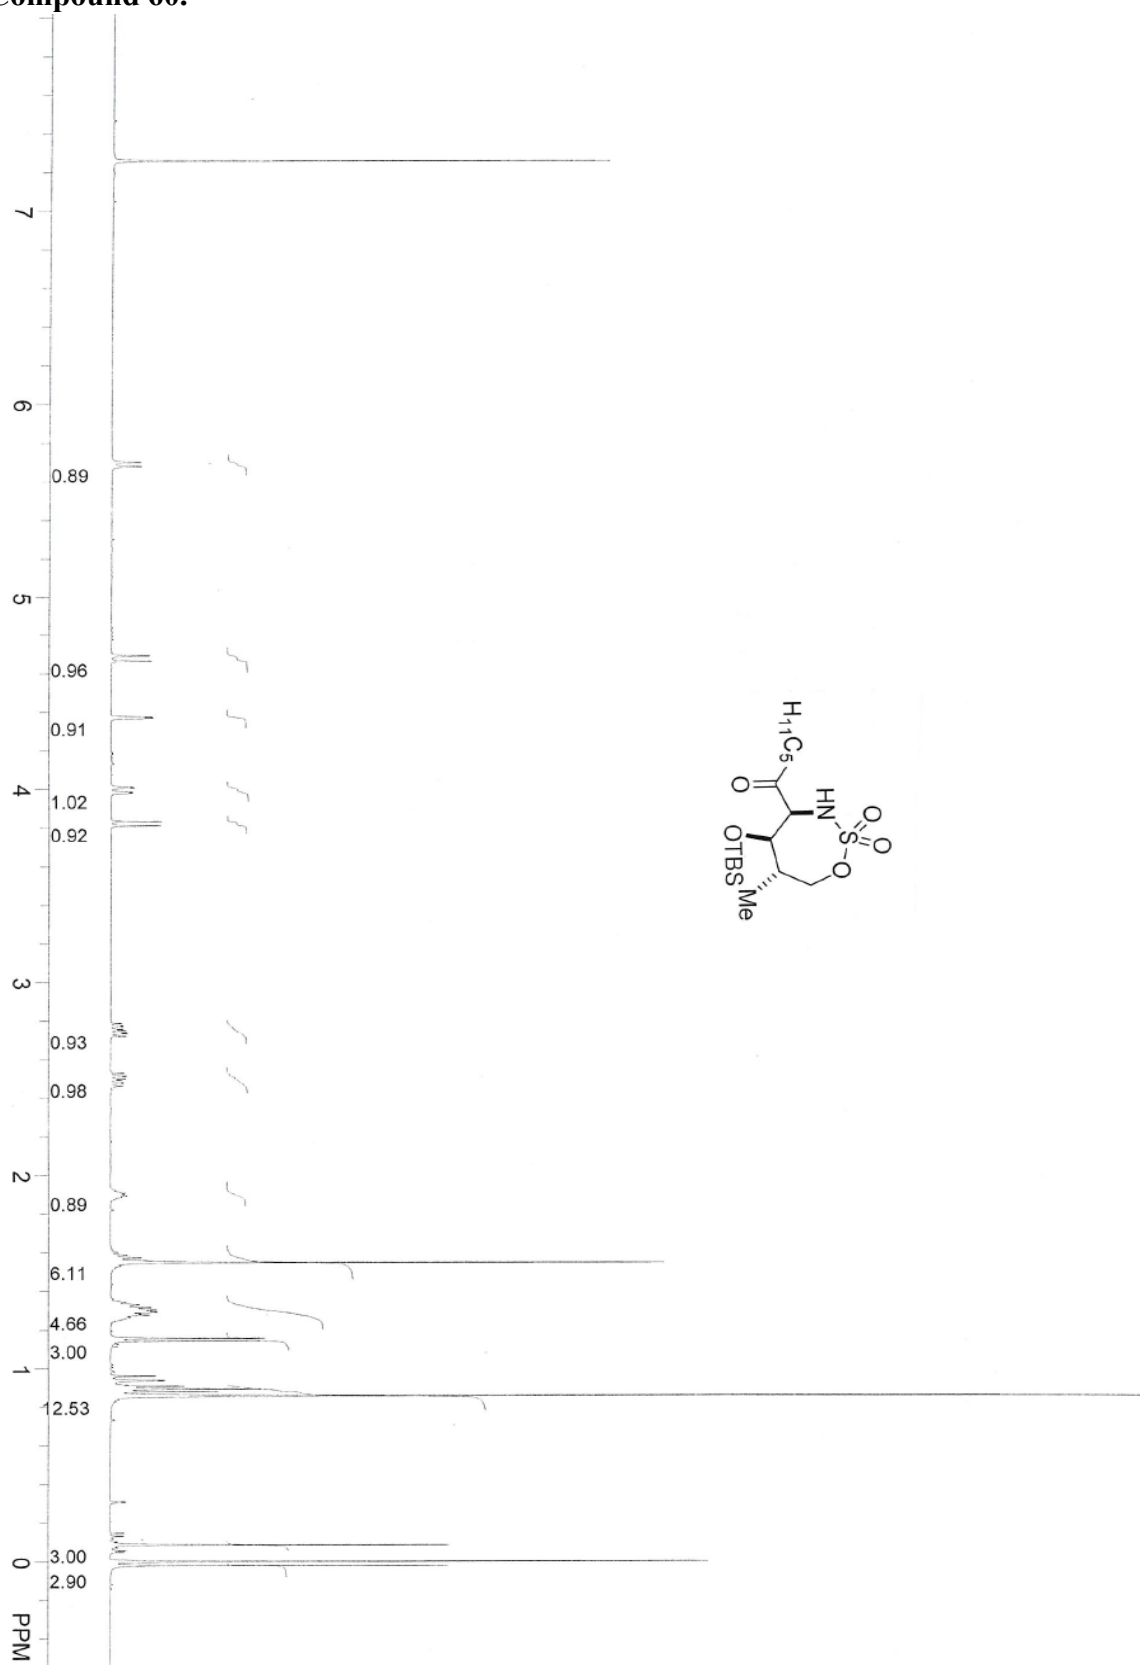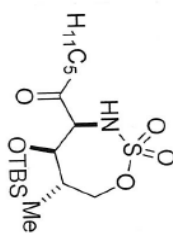

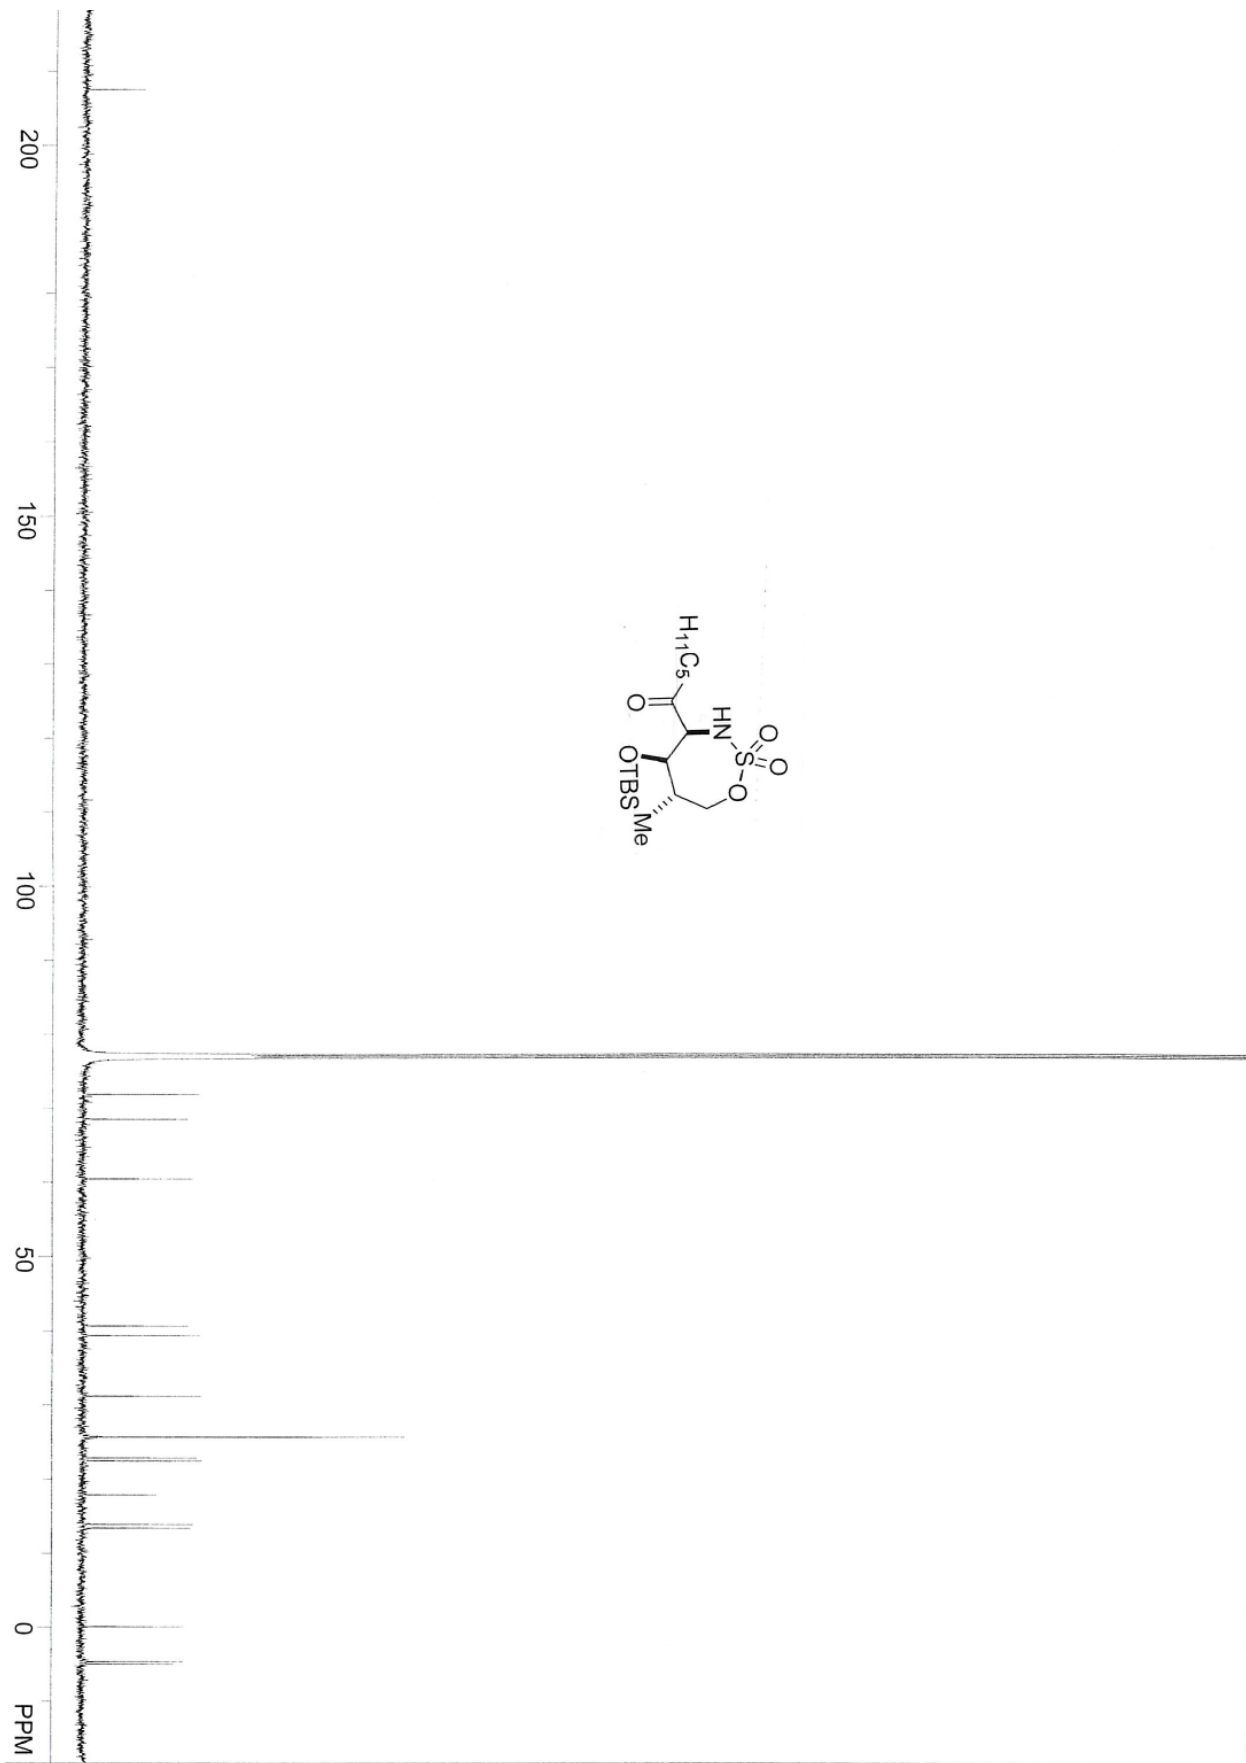

**Compound 61.**

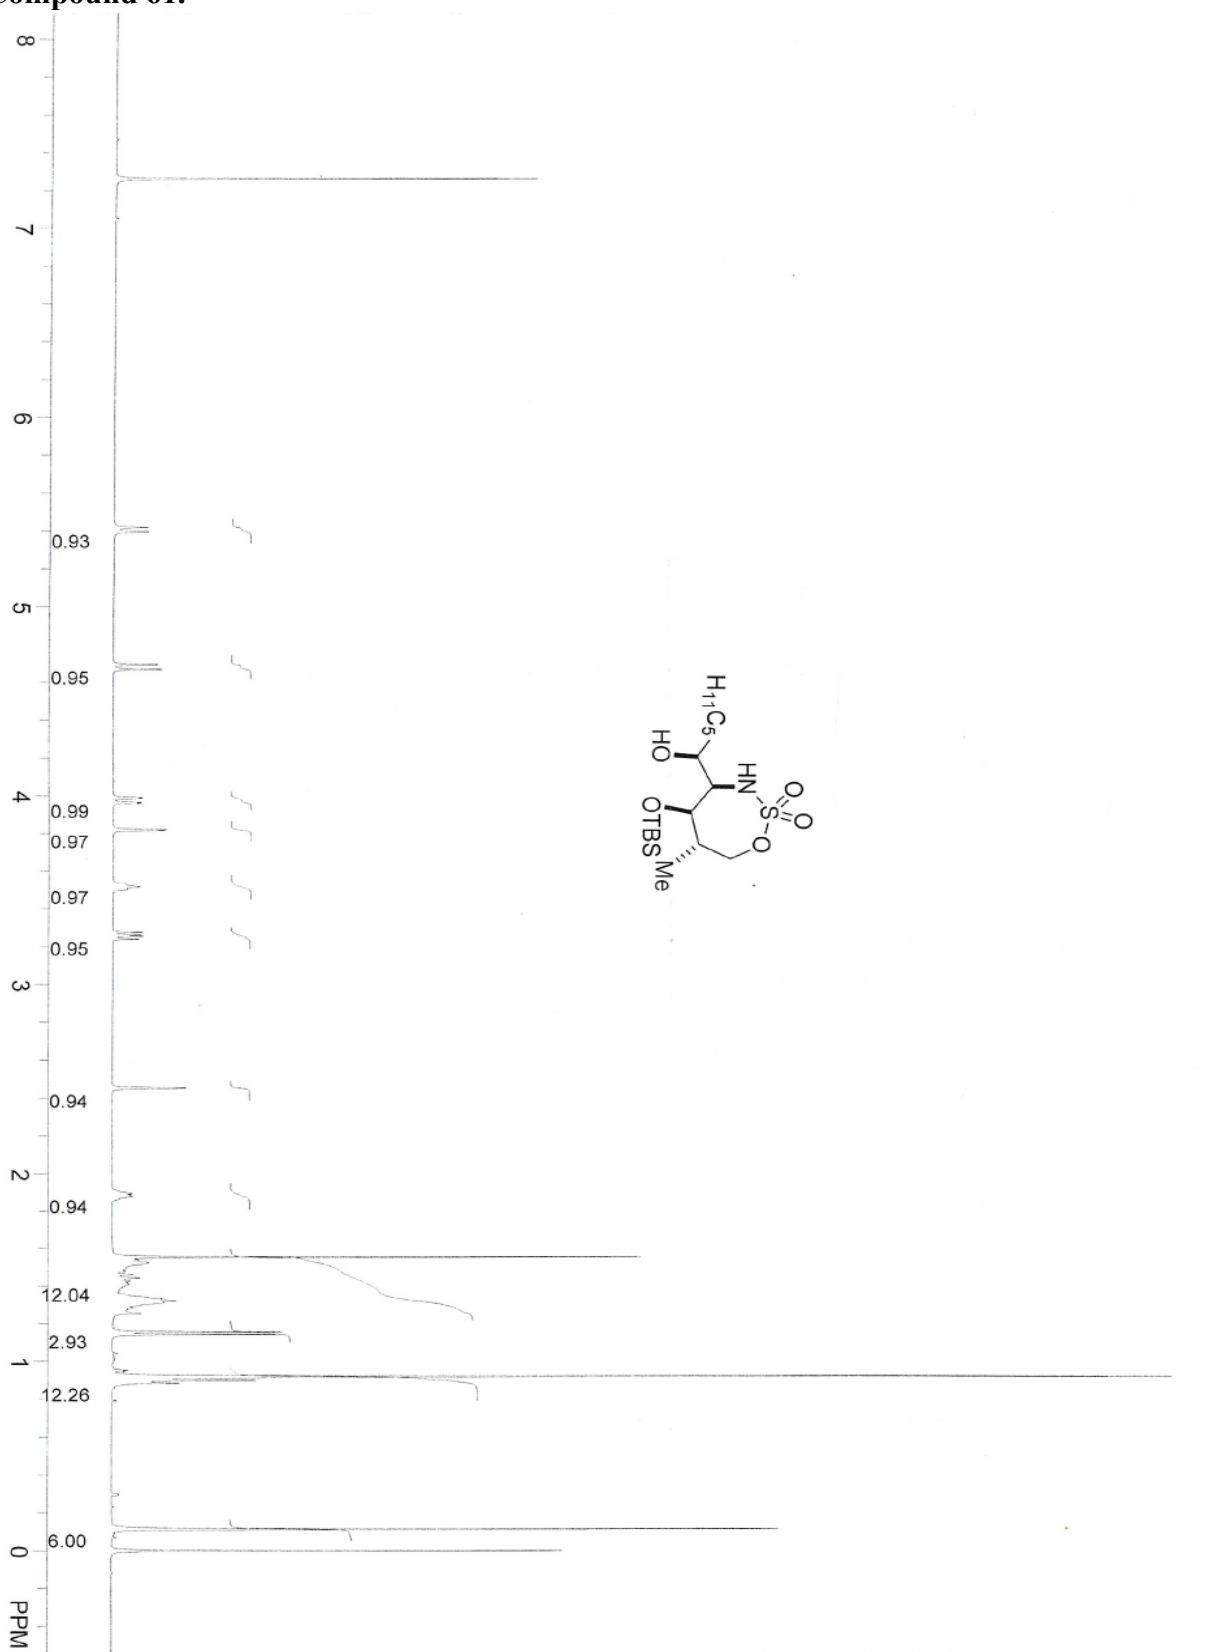

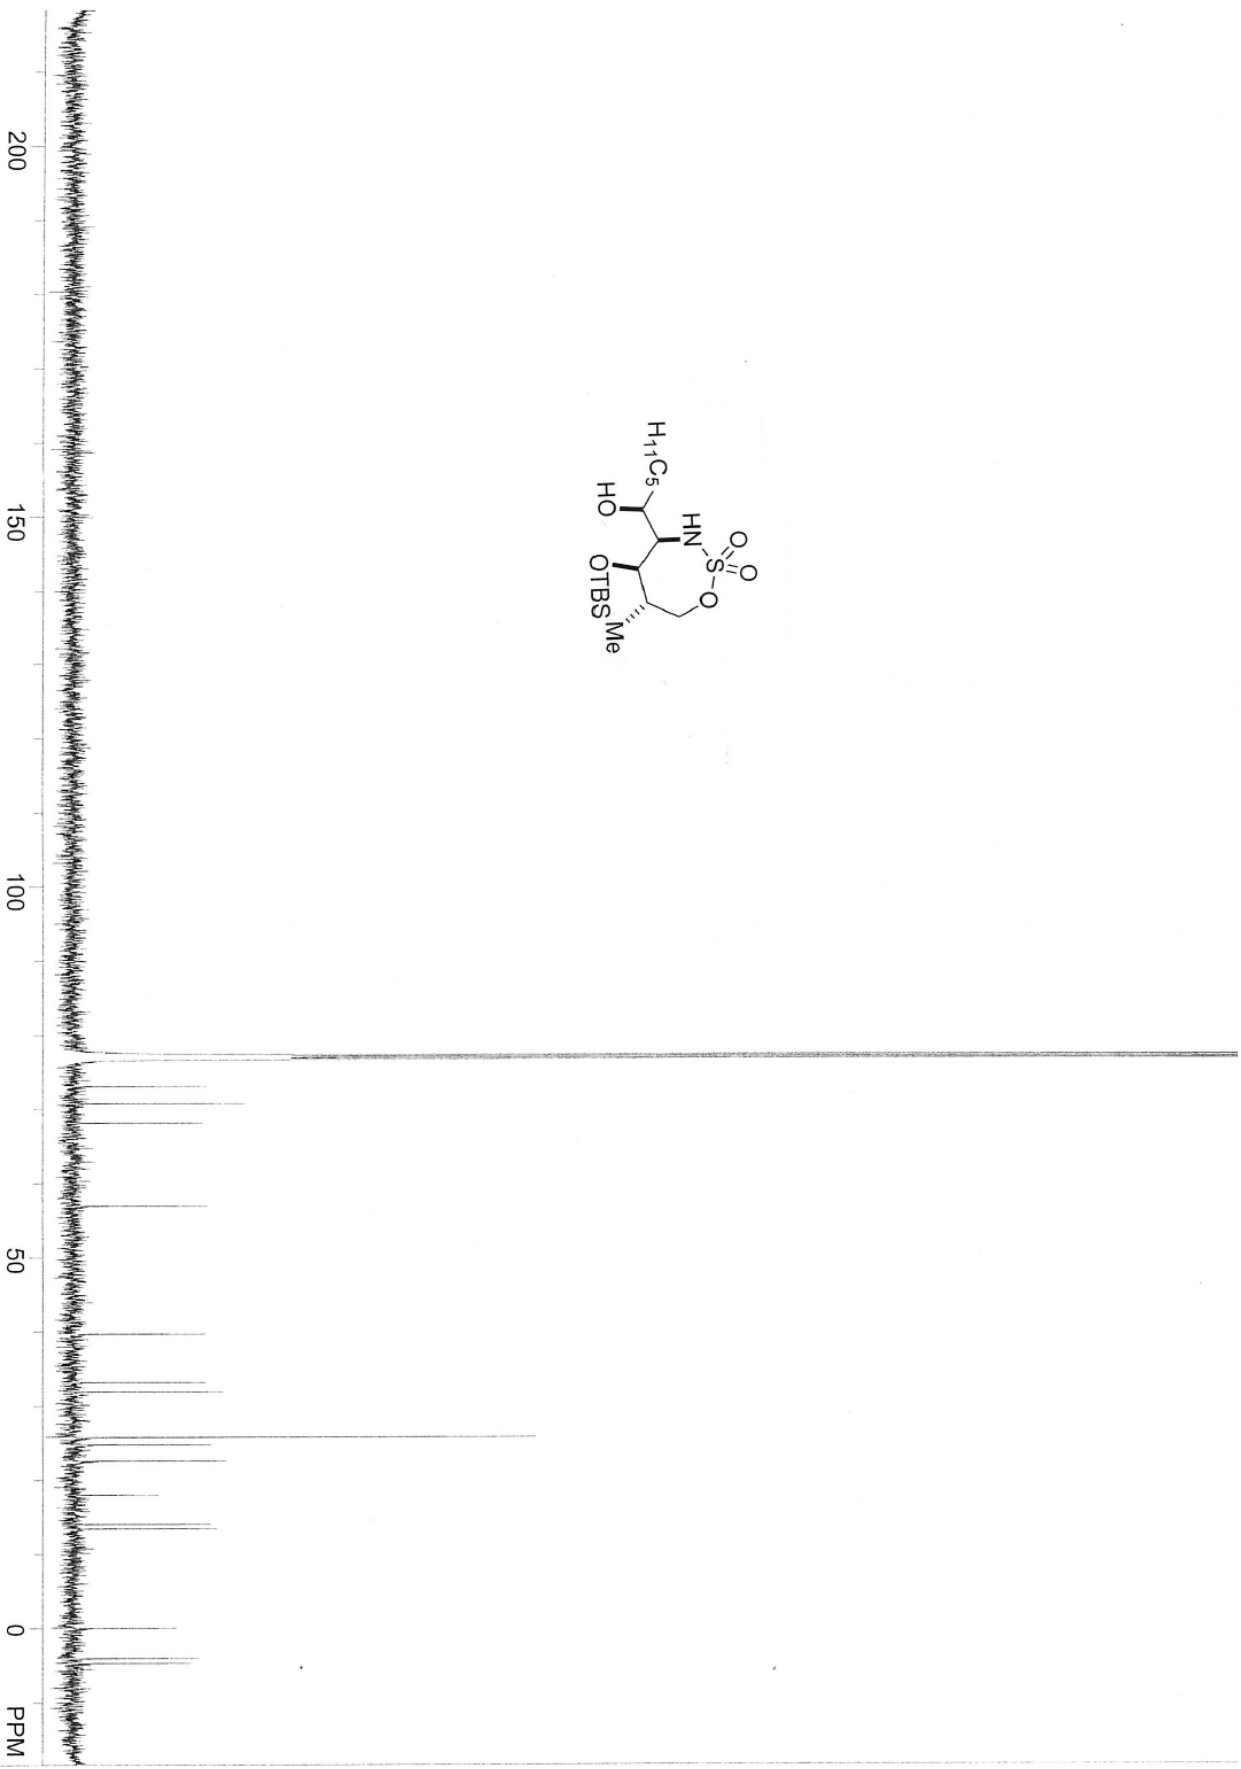

**Compound 63.**

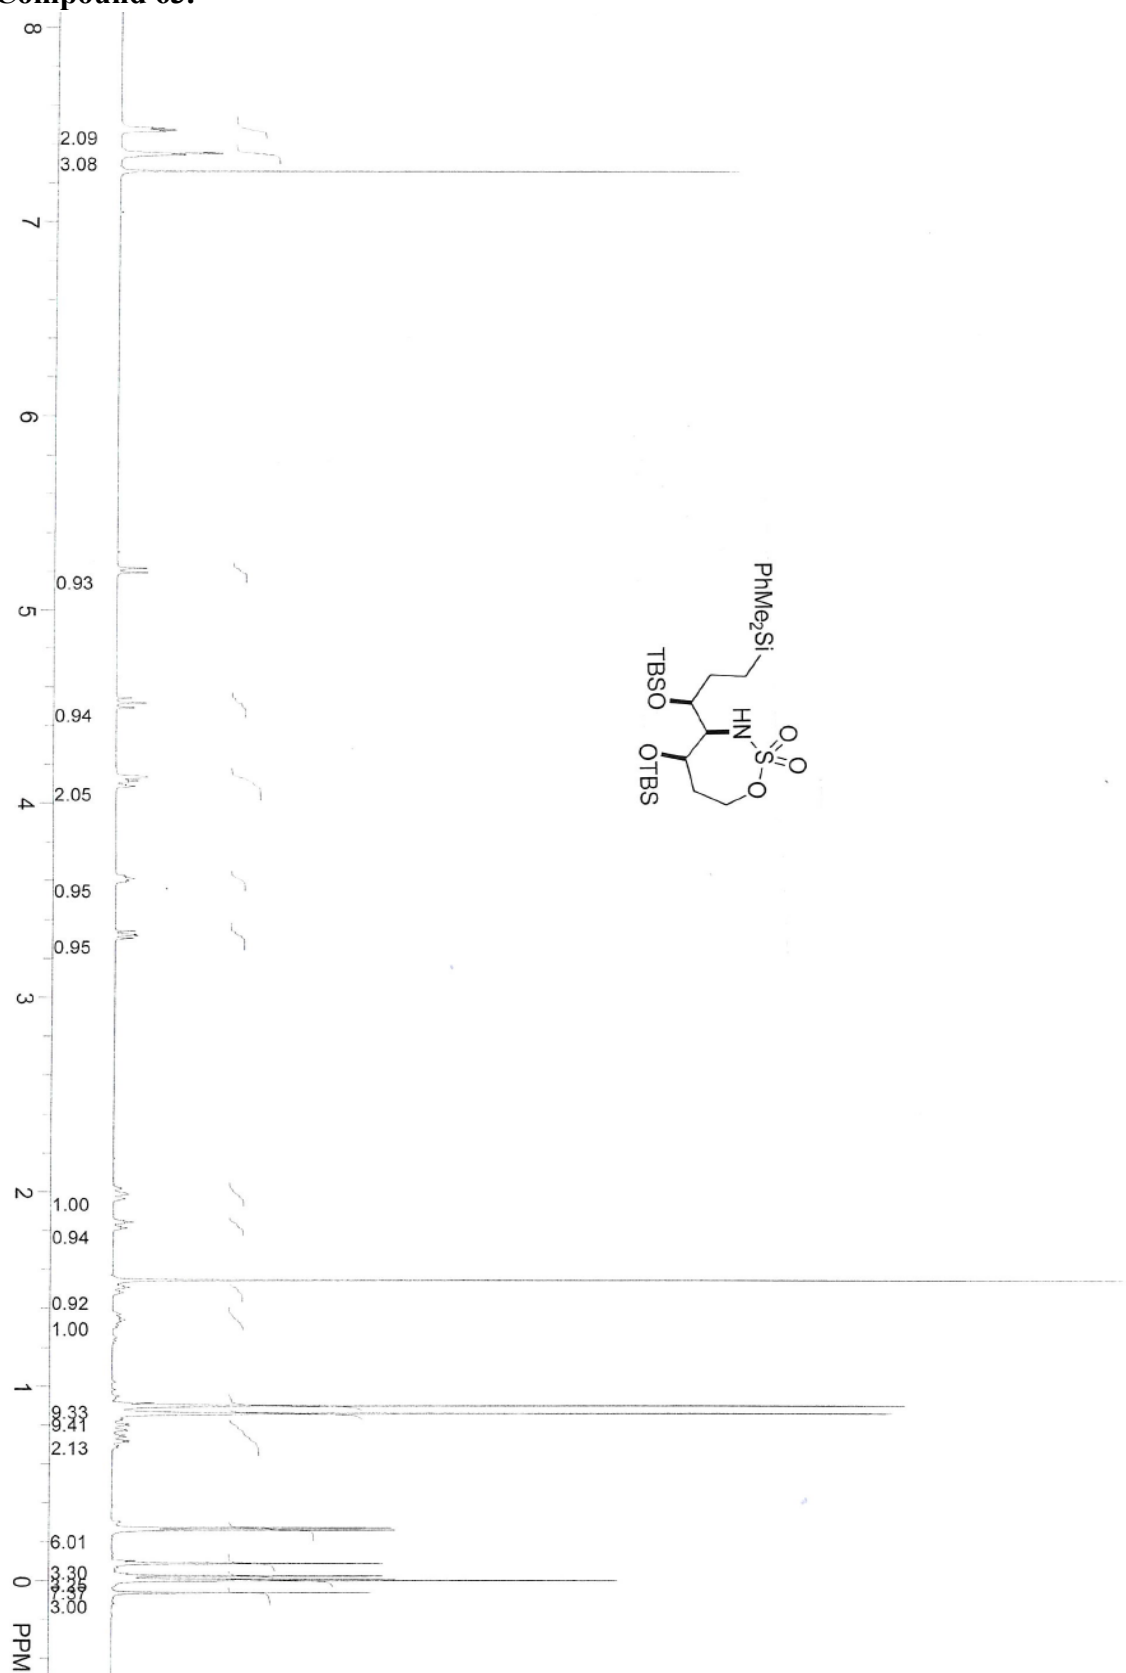



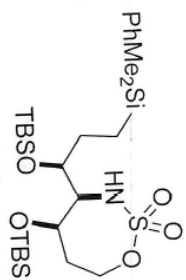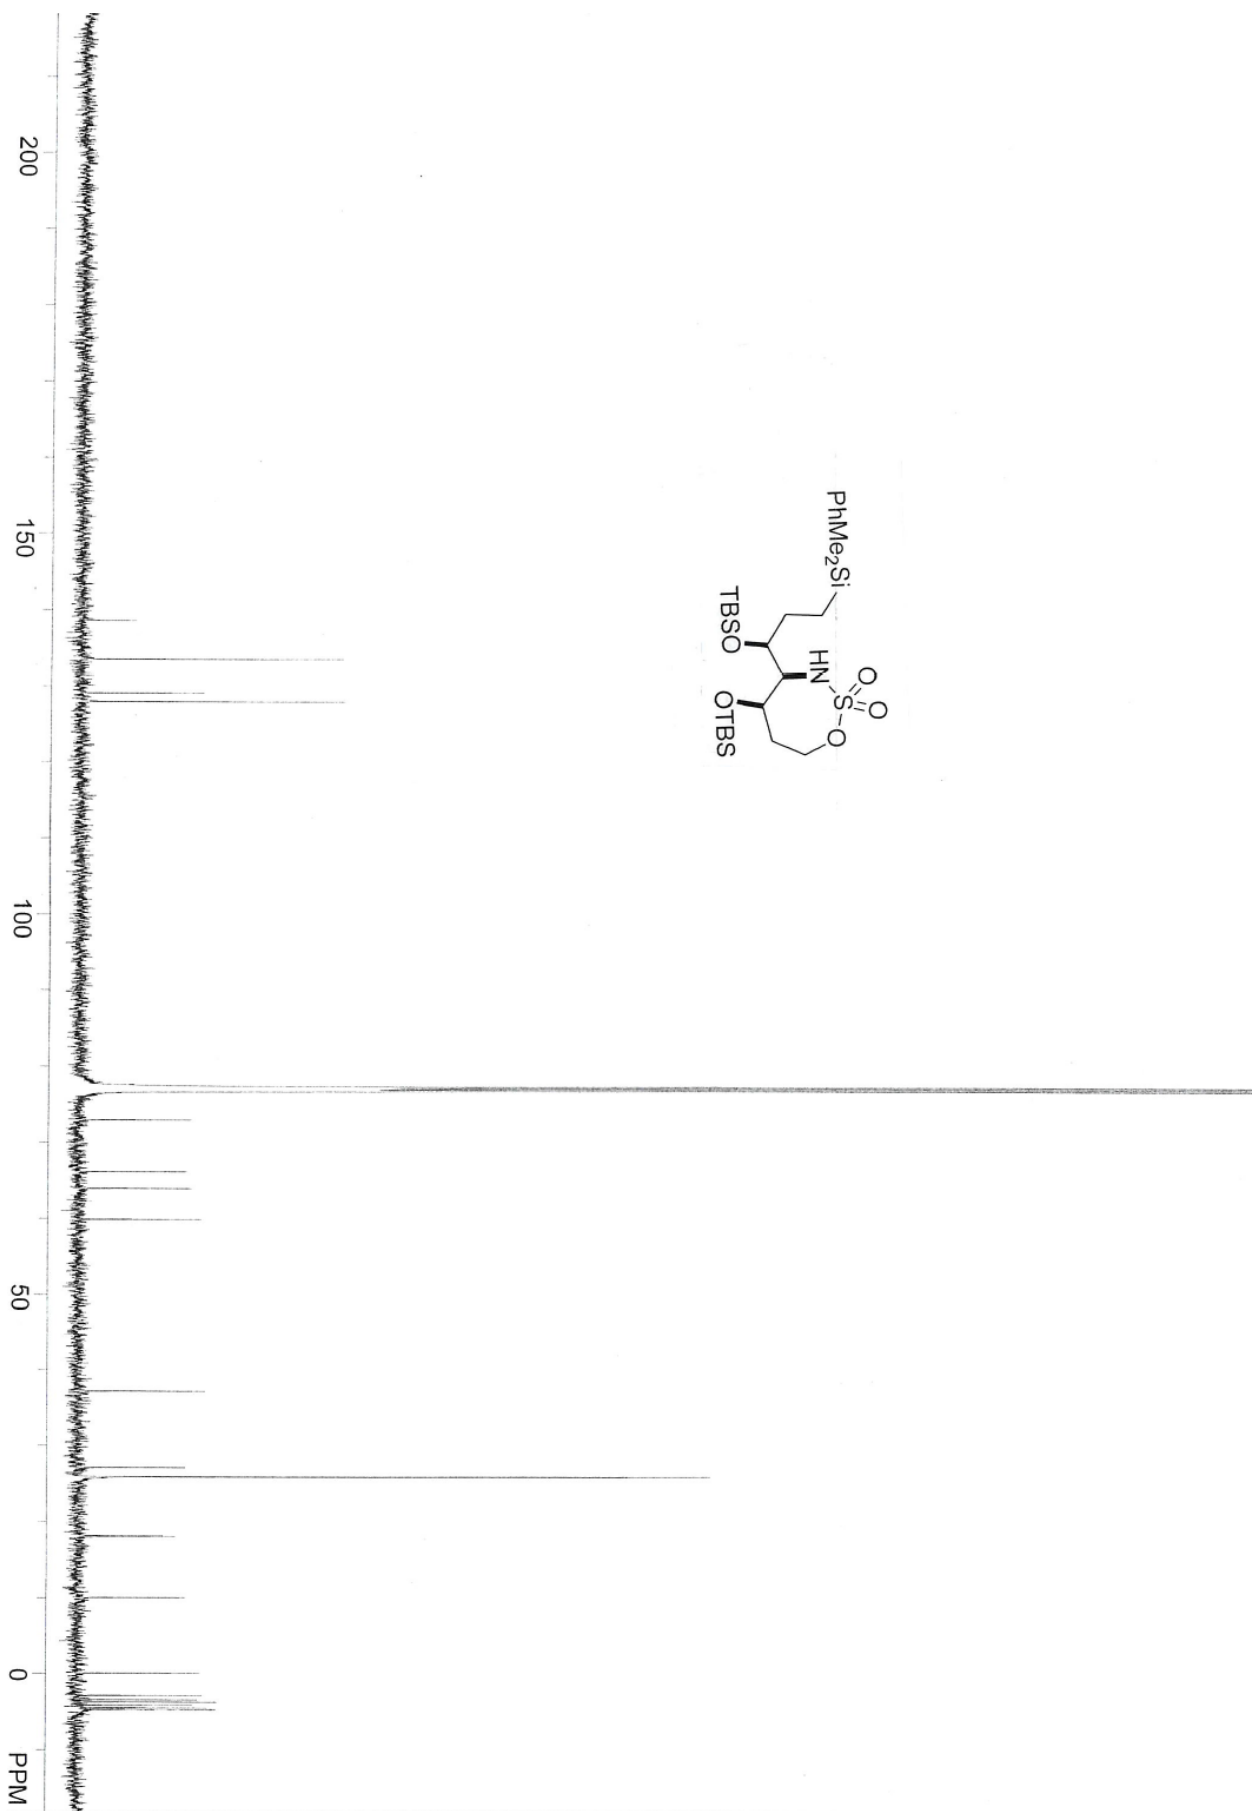

# Compound 63a.

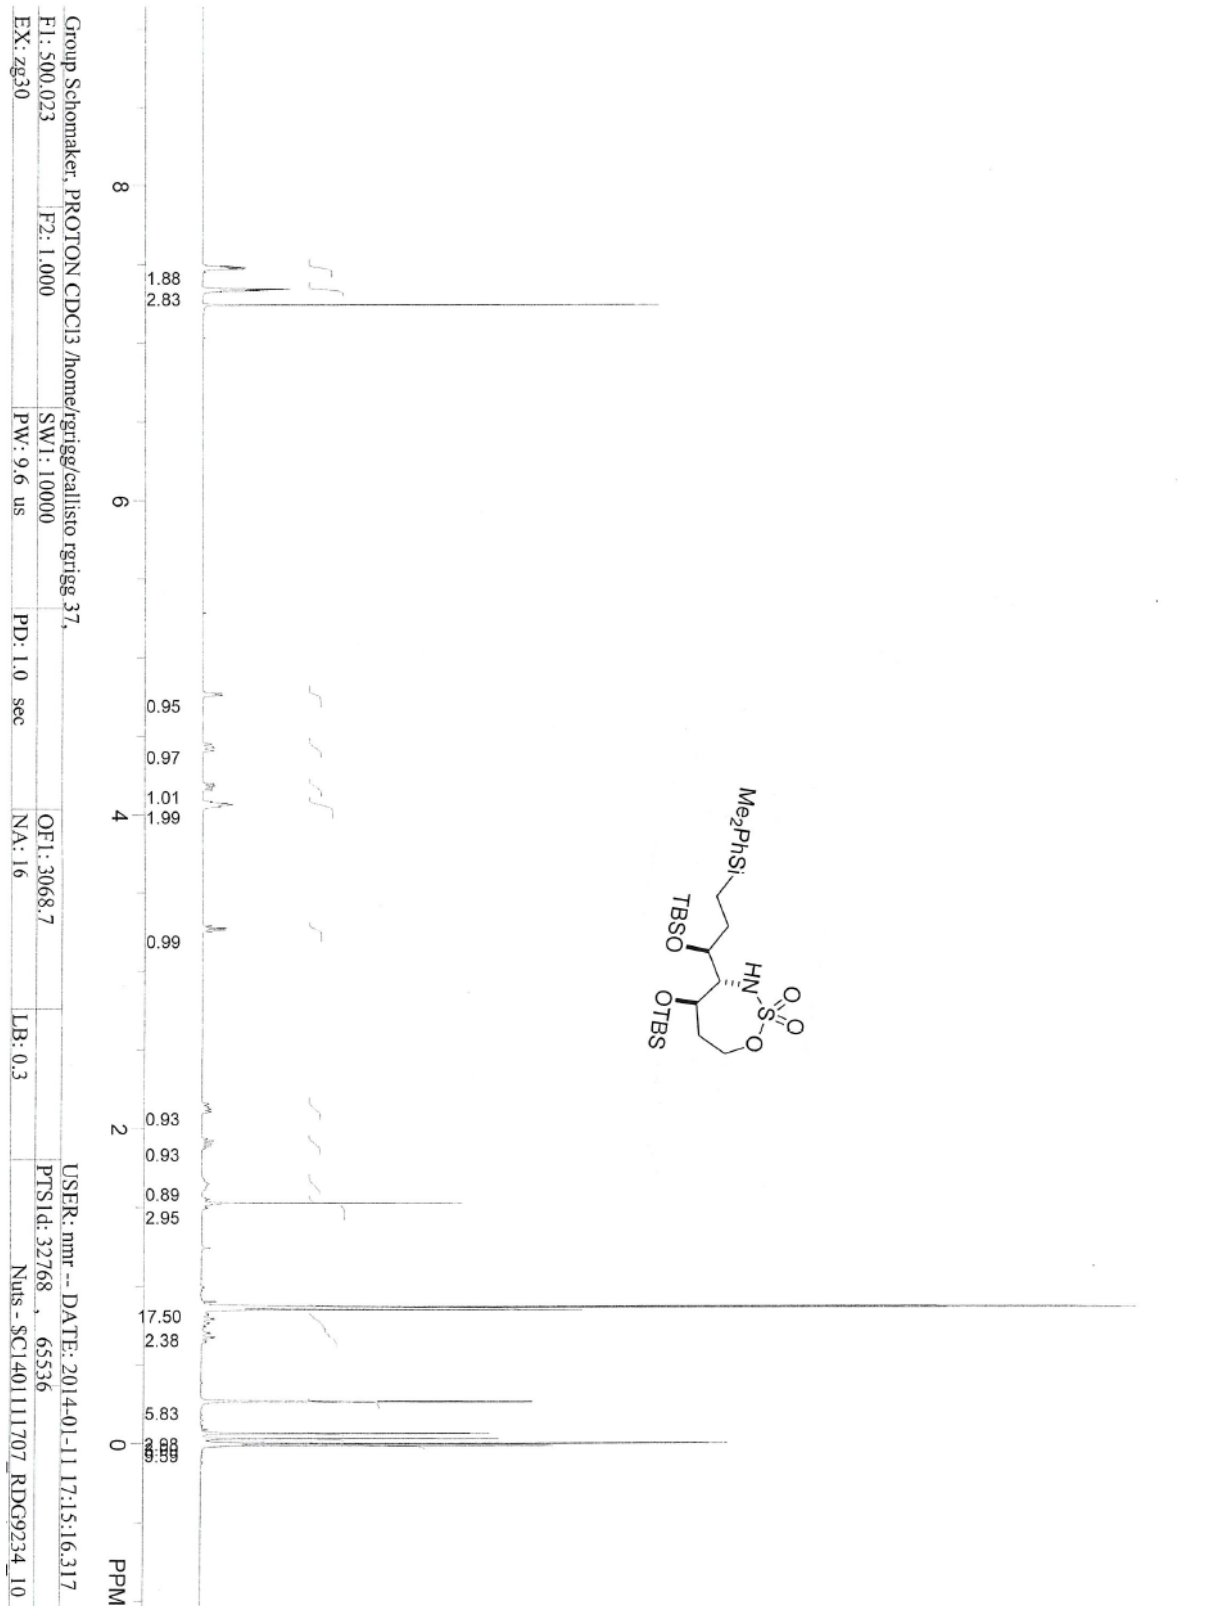

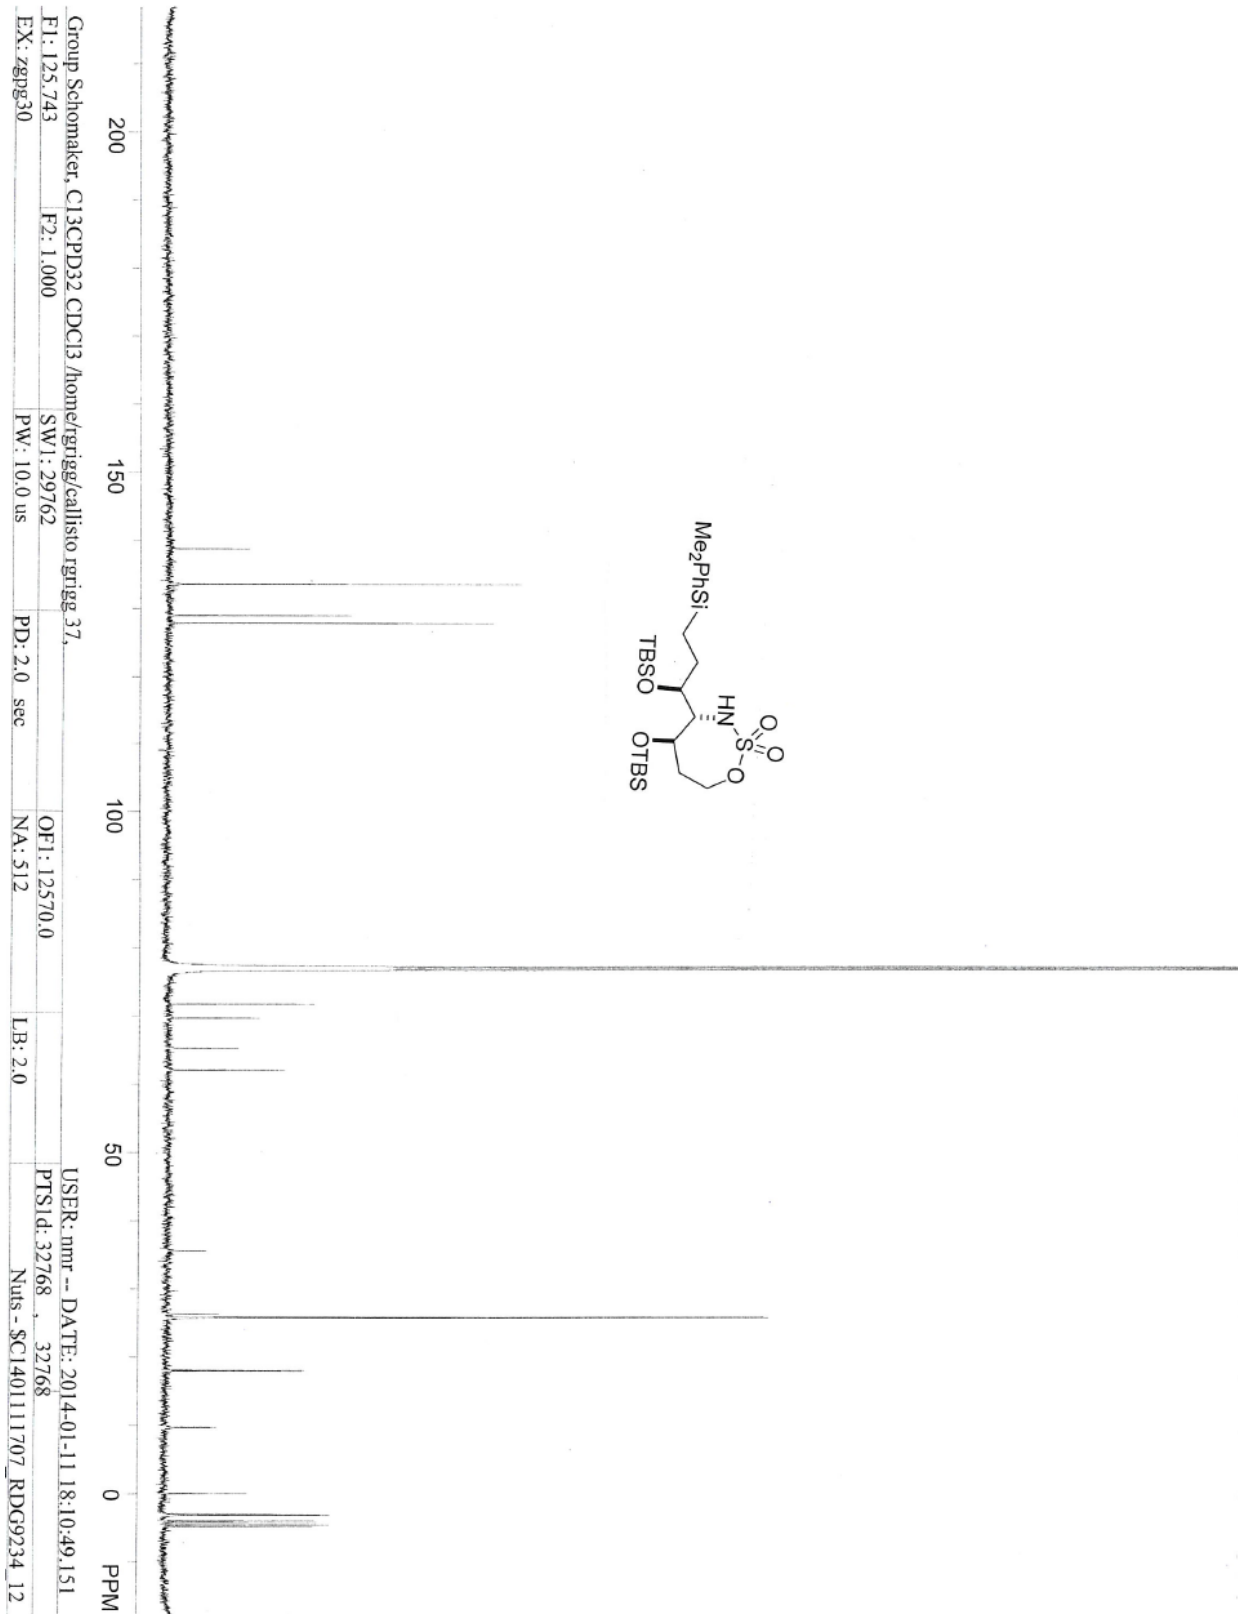

**Compound 63b.**

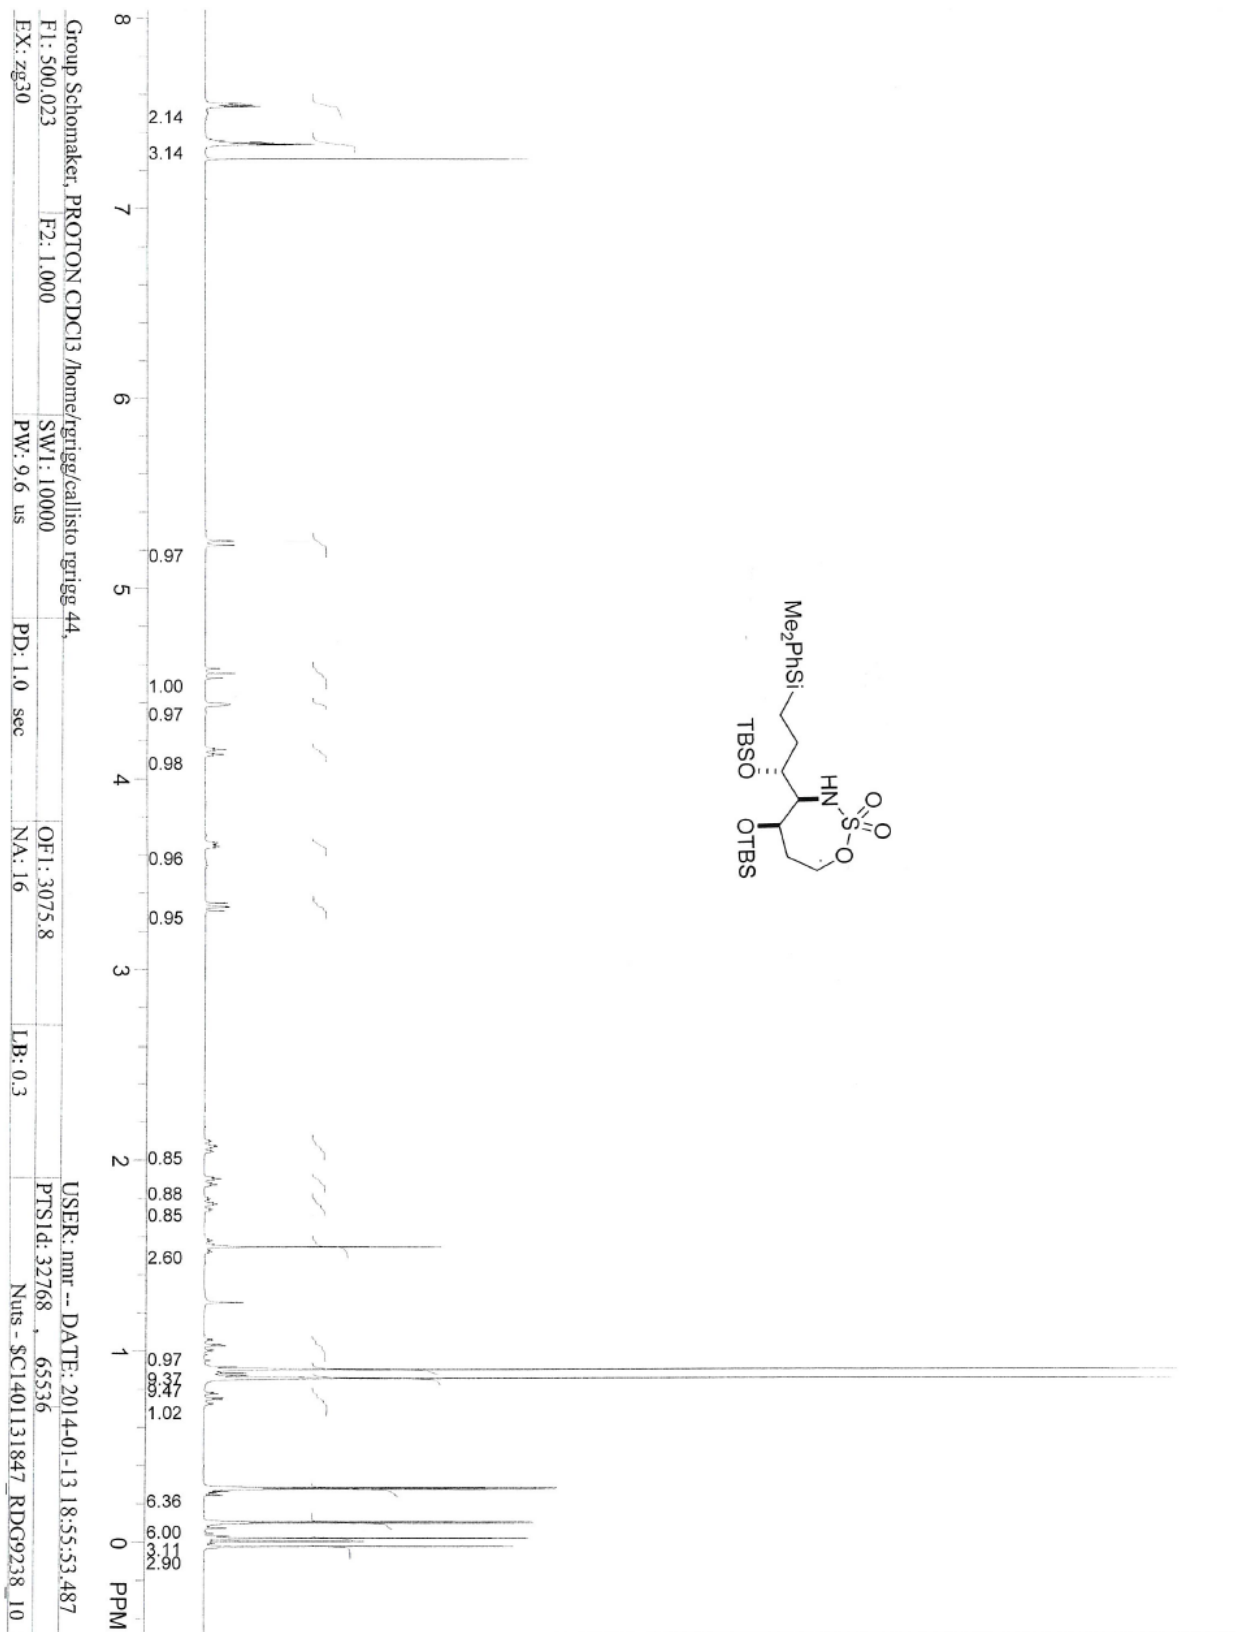

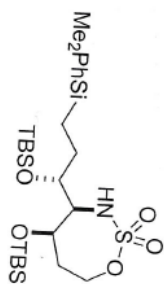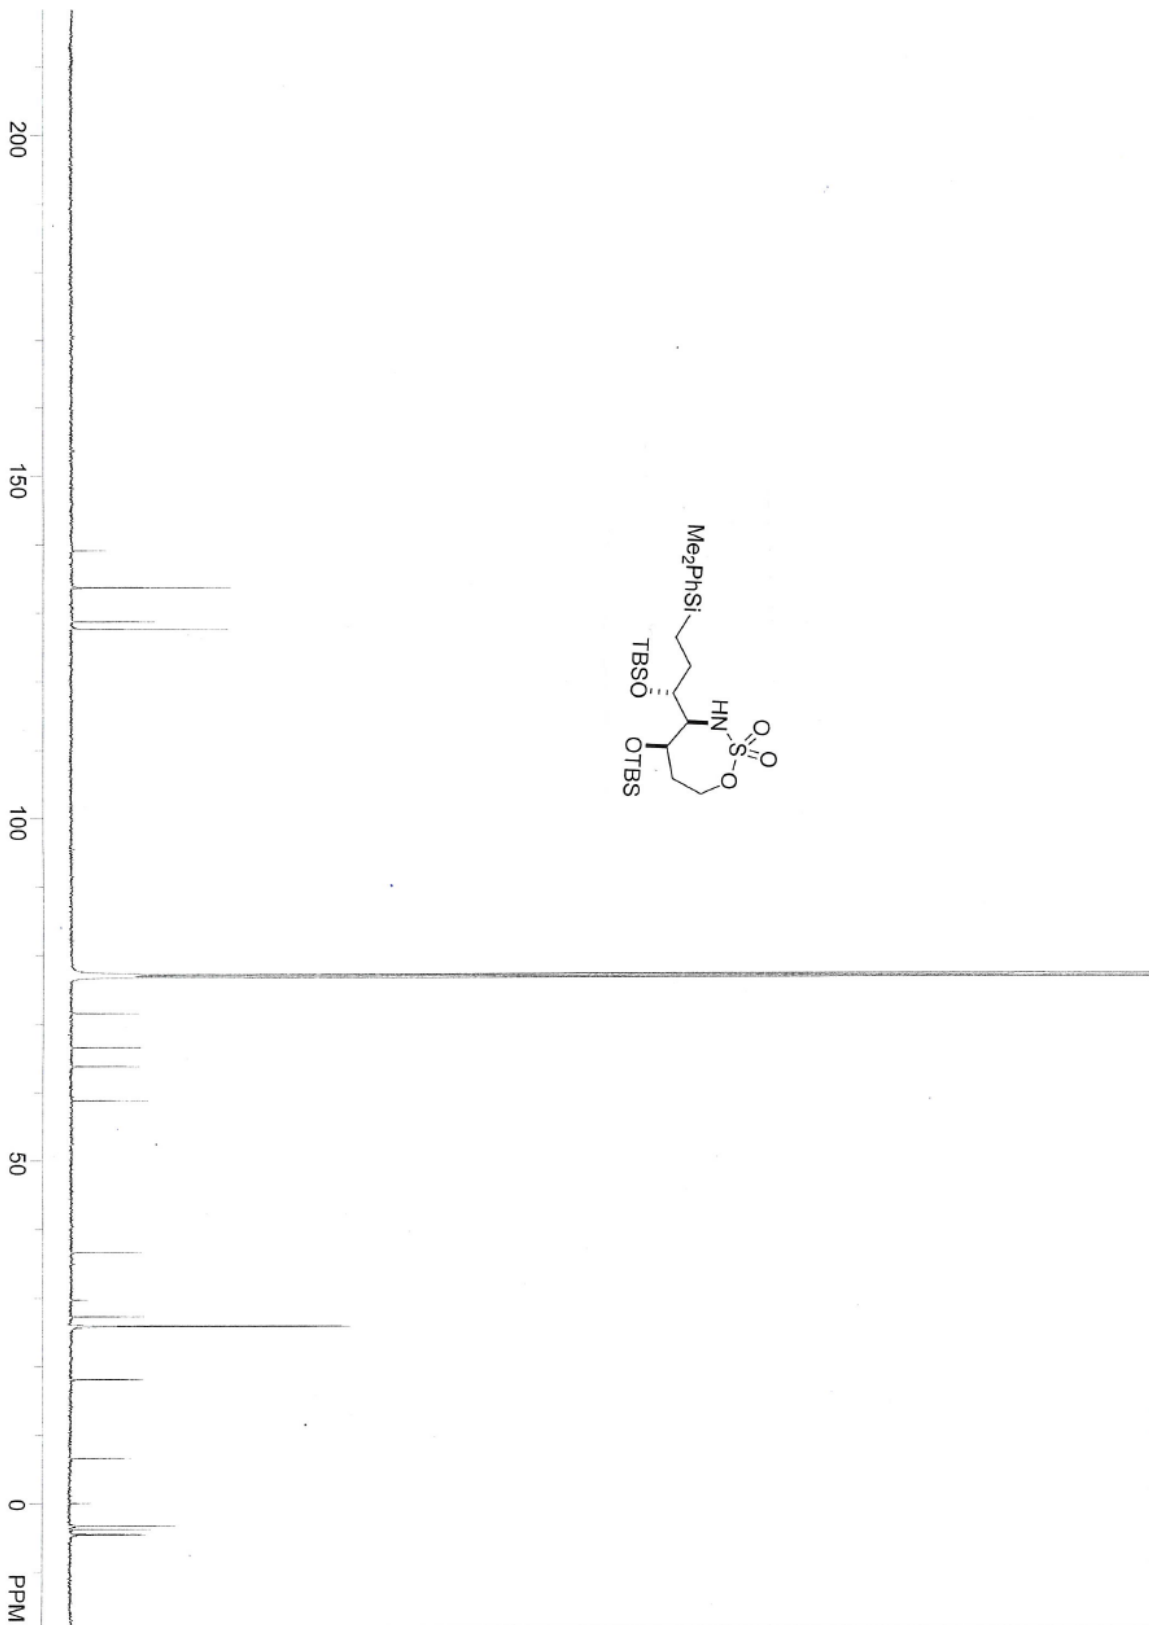

Group Schomaker, C13CPD32 CDCl3 /home/rgrgg/callisto rgrgg 44, USER: nmr -- DATE: 2014-01-13 19:10:39.609  
 F1: 125.743 F2: 1.000 SW1: 29762 OF1: 12570.0 PTS1 d: 32768 , 32768  
 EX: zgrpg30 PW: 10.0 us PD: 2.0 sec NA: 256 LB: 2.0 Nuis - \$C1401131847\_RDG9238\_11

# Compound 63c.

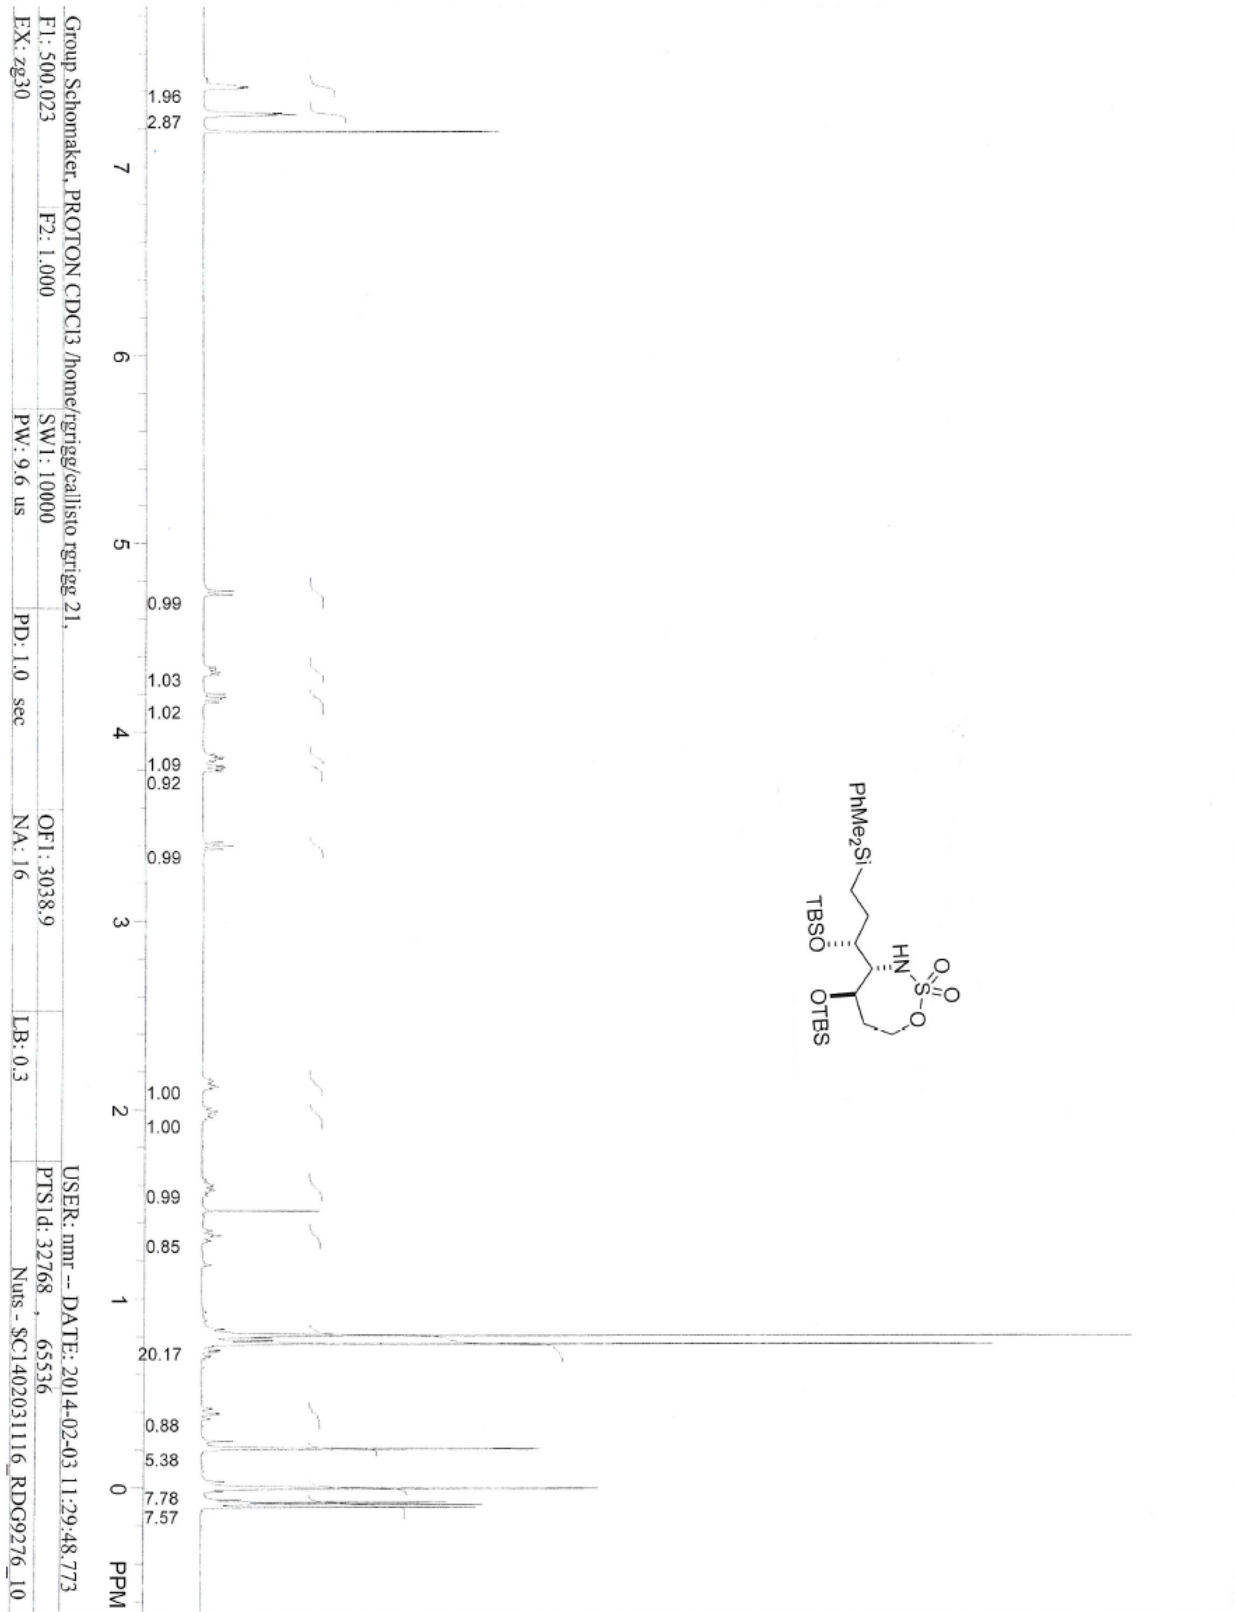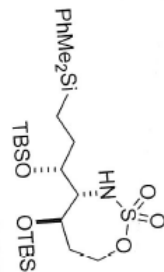

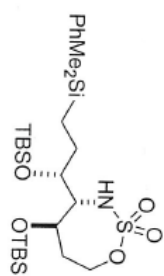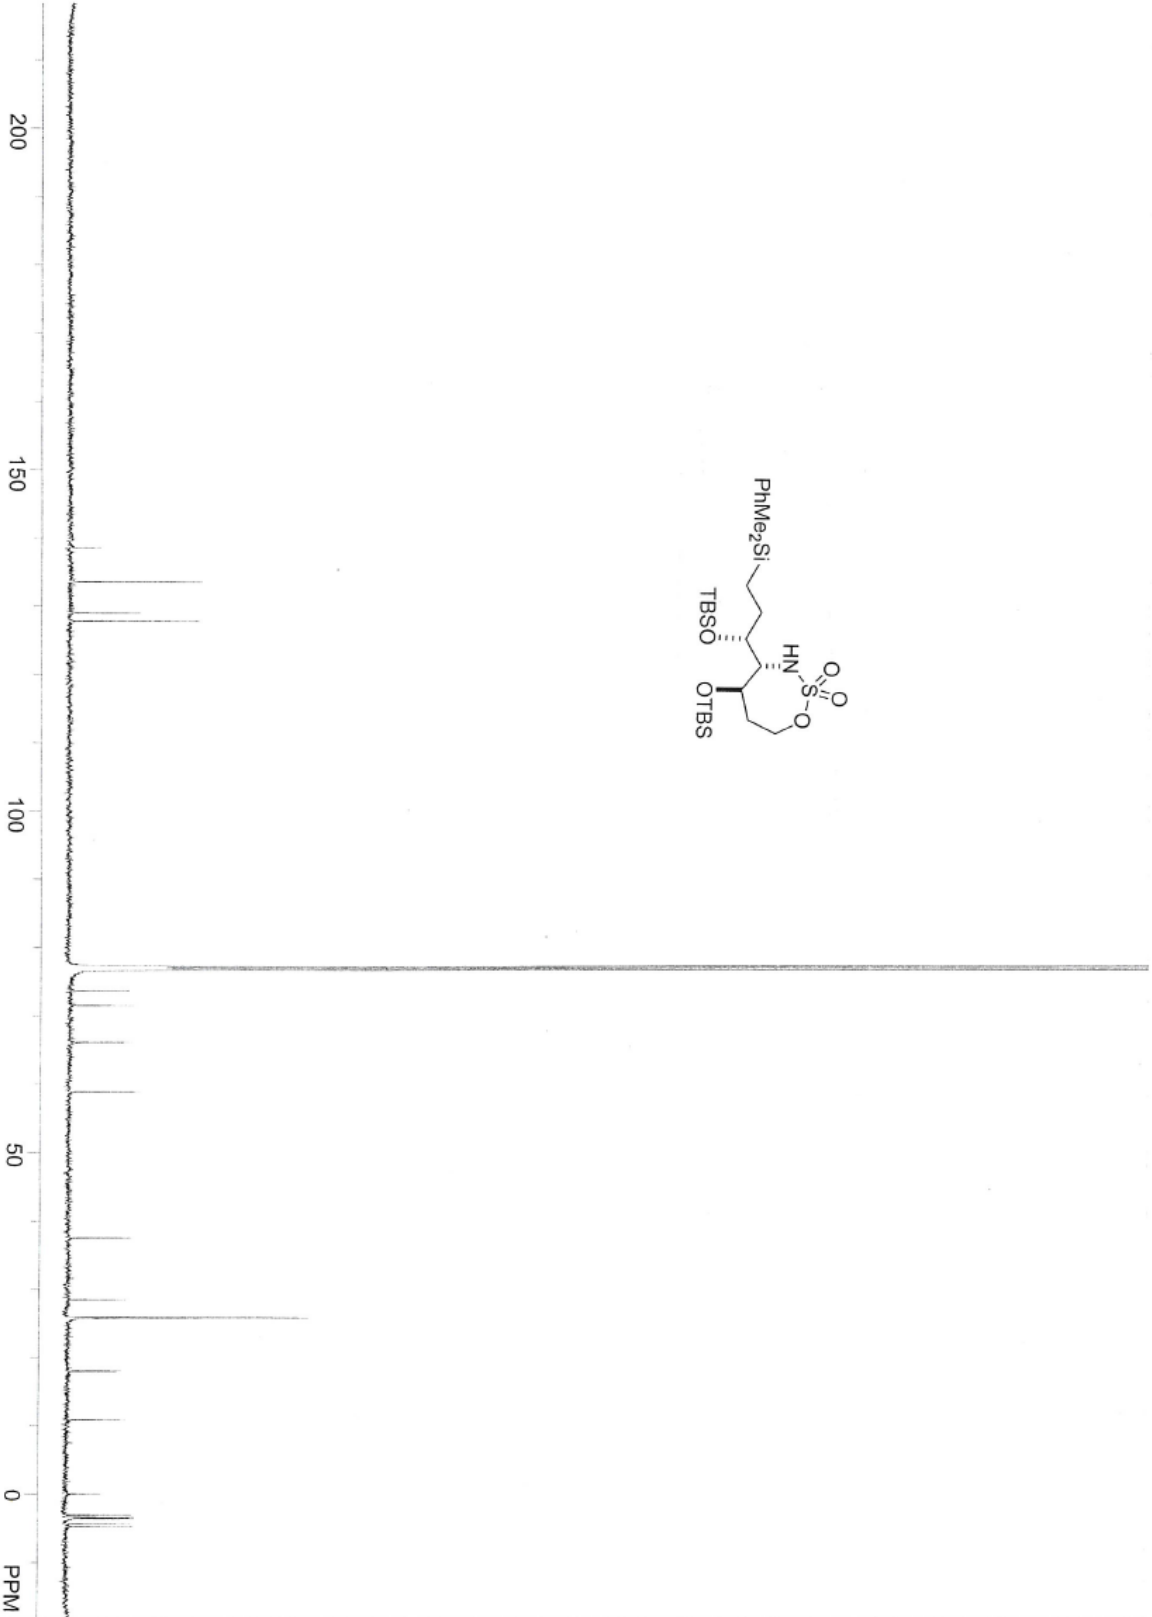

Group: Schomaker, C13CPD32.CDC13 /home/griigg/callisto\_rgrigg\_21, USER: mmr -- DATE: 2014-02-03 11:26:37.508  
 F1: 125.743 F2: 1.000 SW1: 29762 OF1: 12570.0 PTS1d: 32768, 32768  
 EX: zgpg30 PW: 10.0 us PD: 2.0 sec NA: 128 LB: 2.0 Nuts - SC1402031116 RDG9276 11





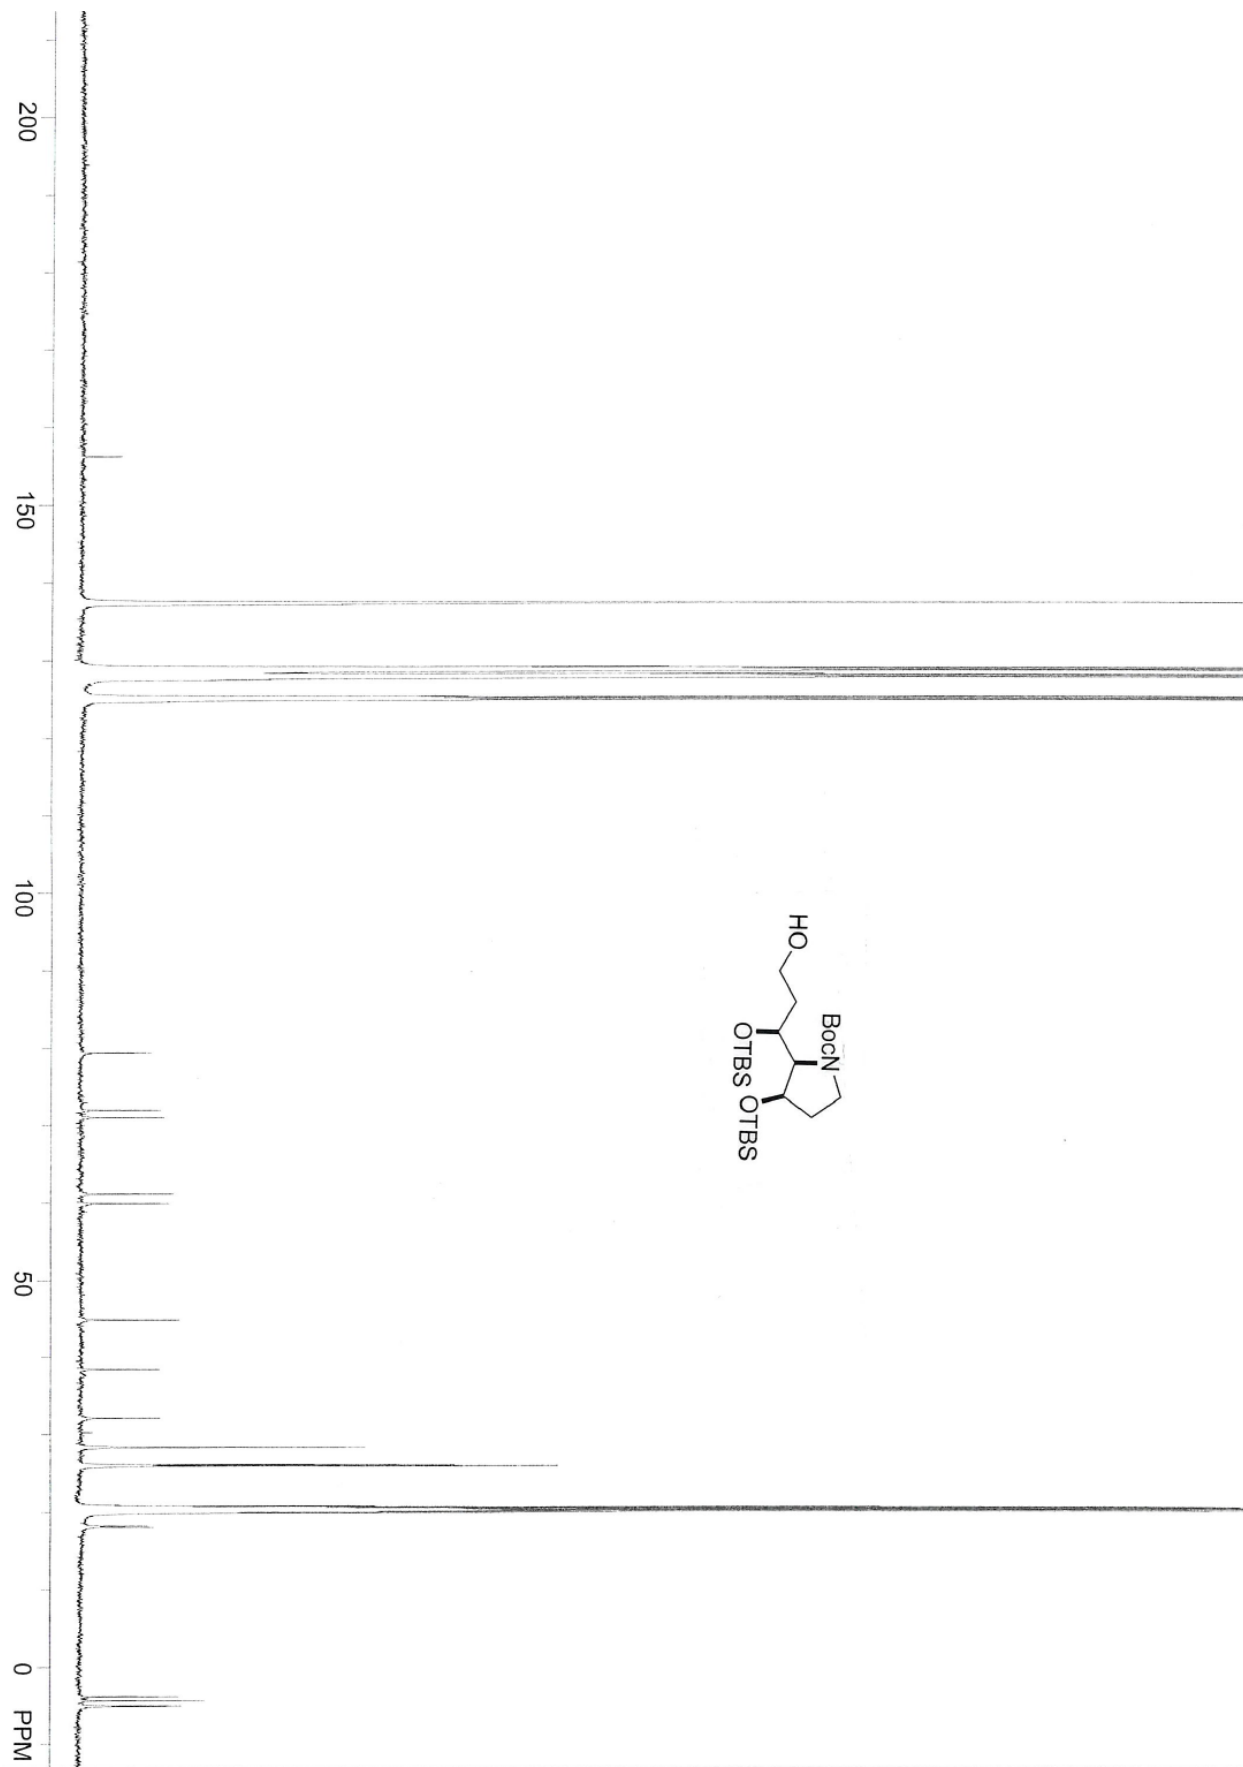

**Compound 64a.**

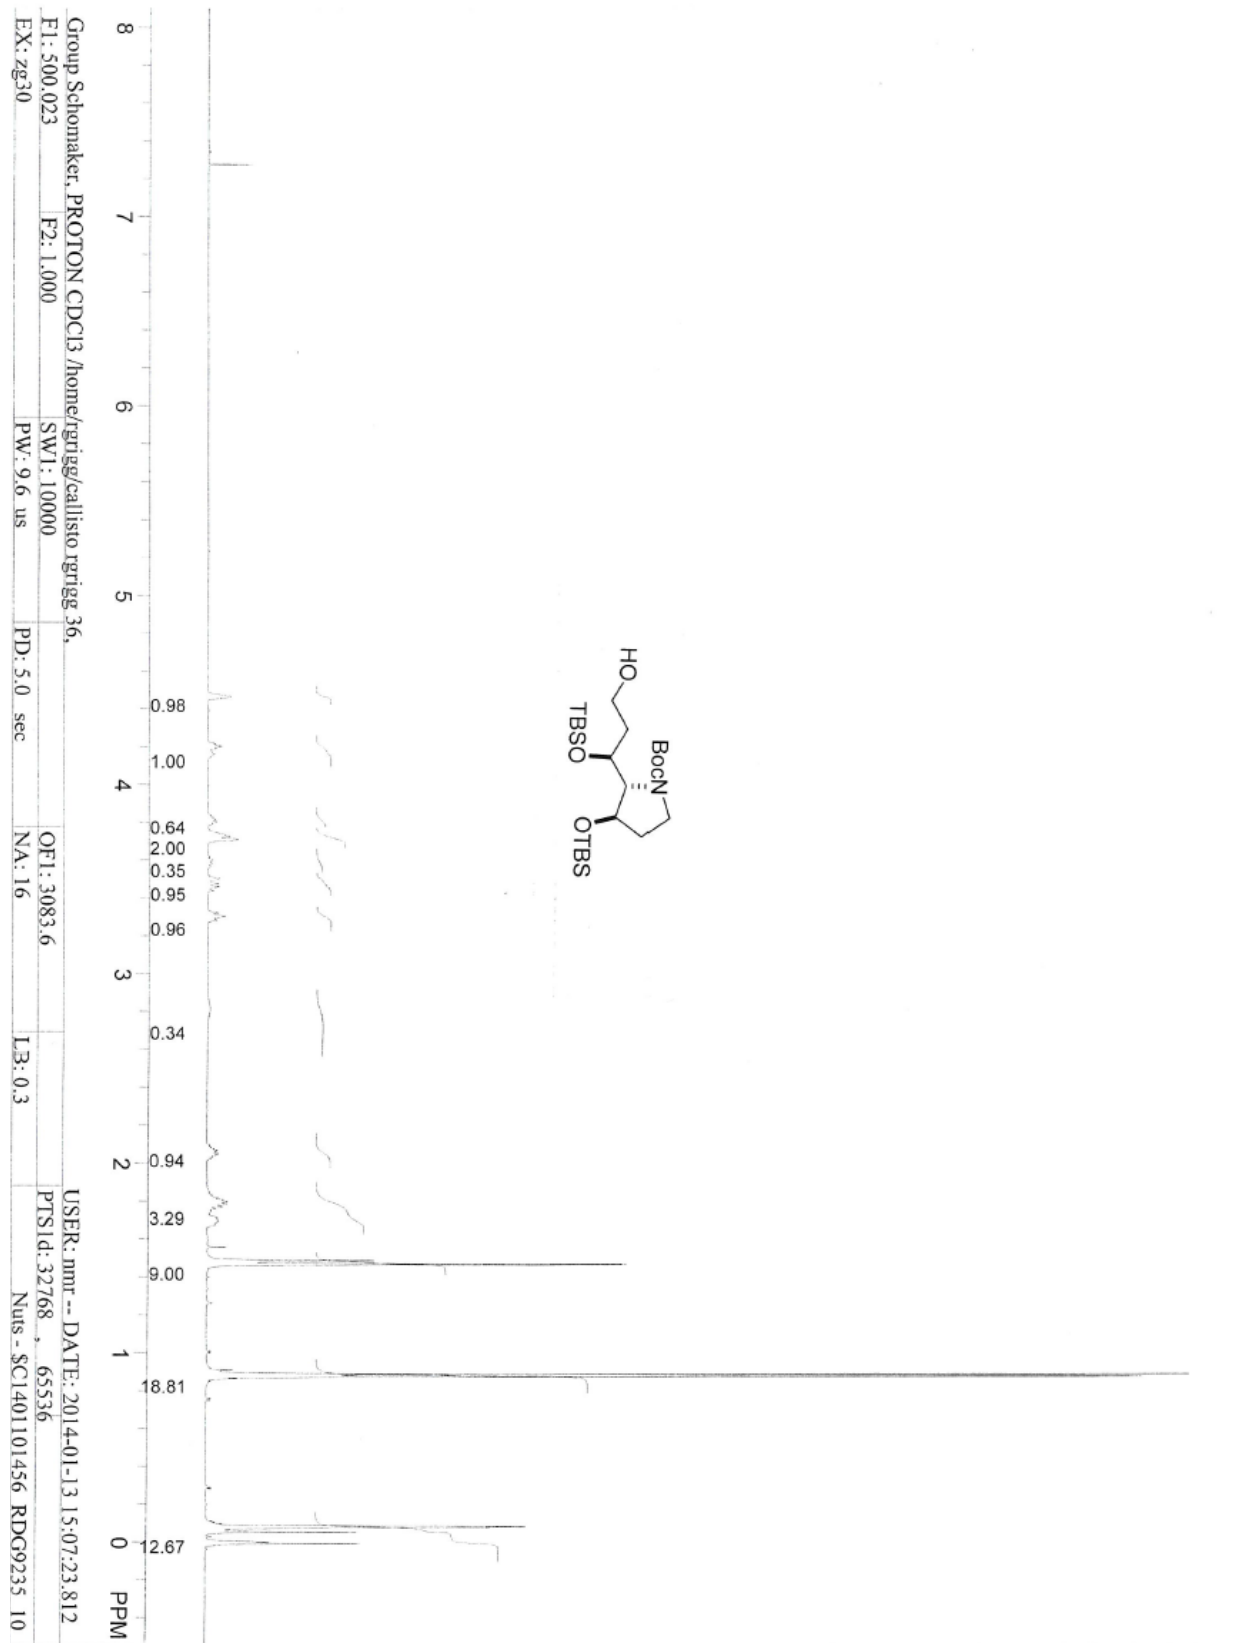

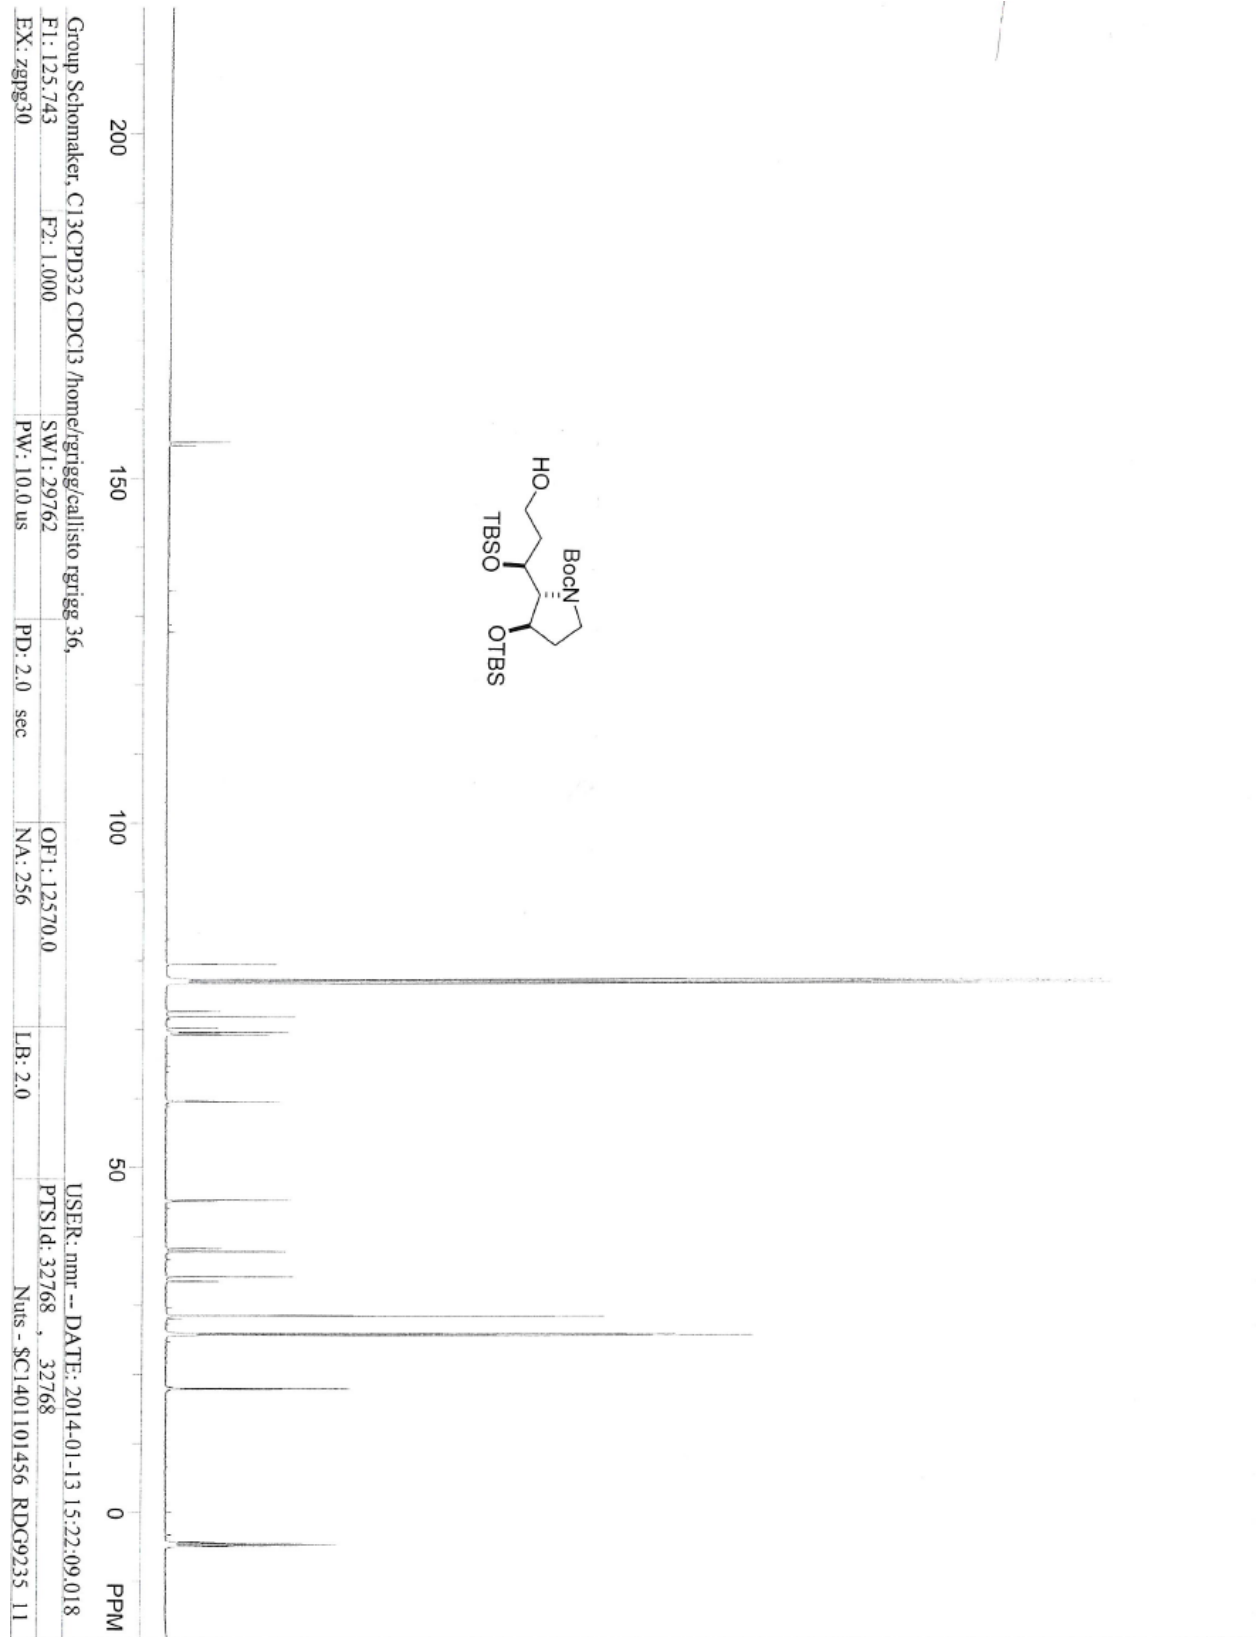

### Compound 64b.

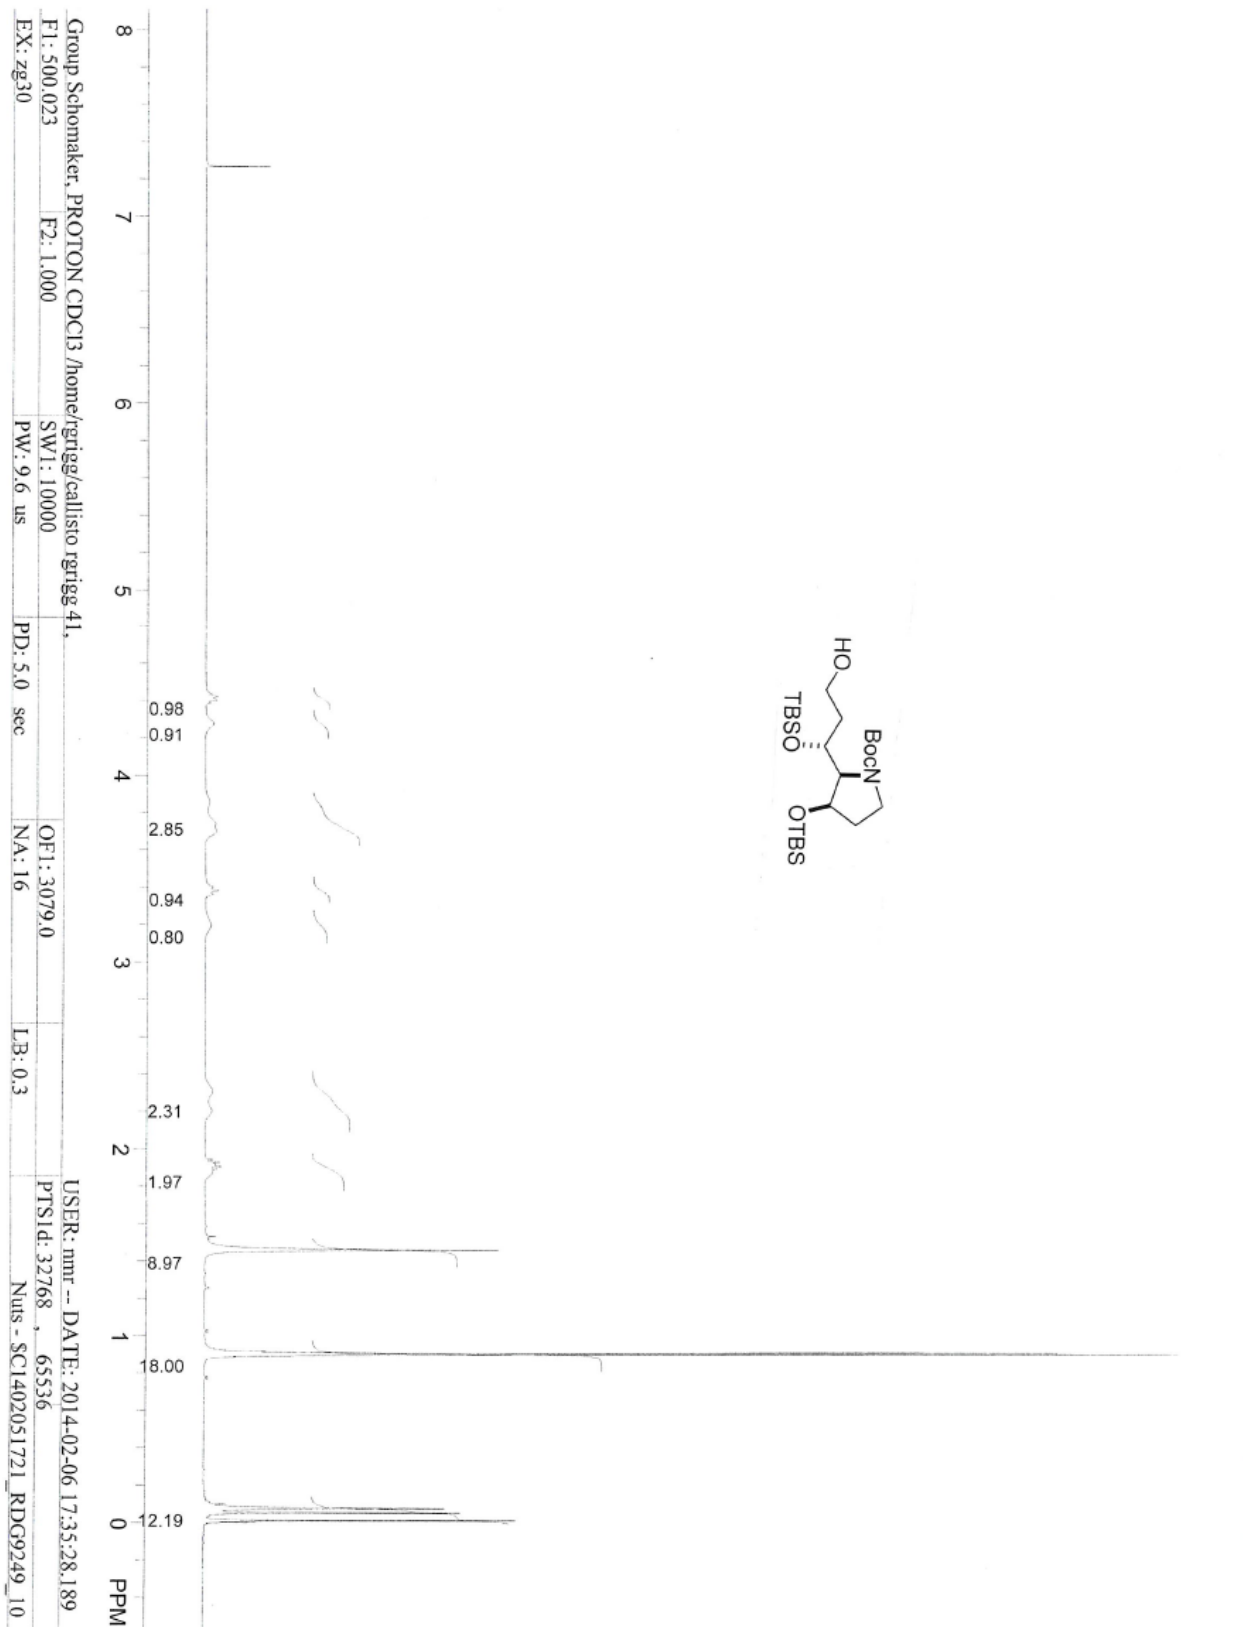

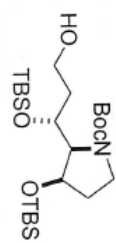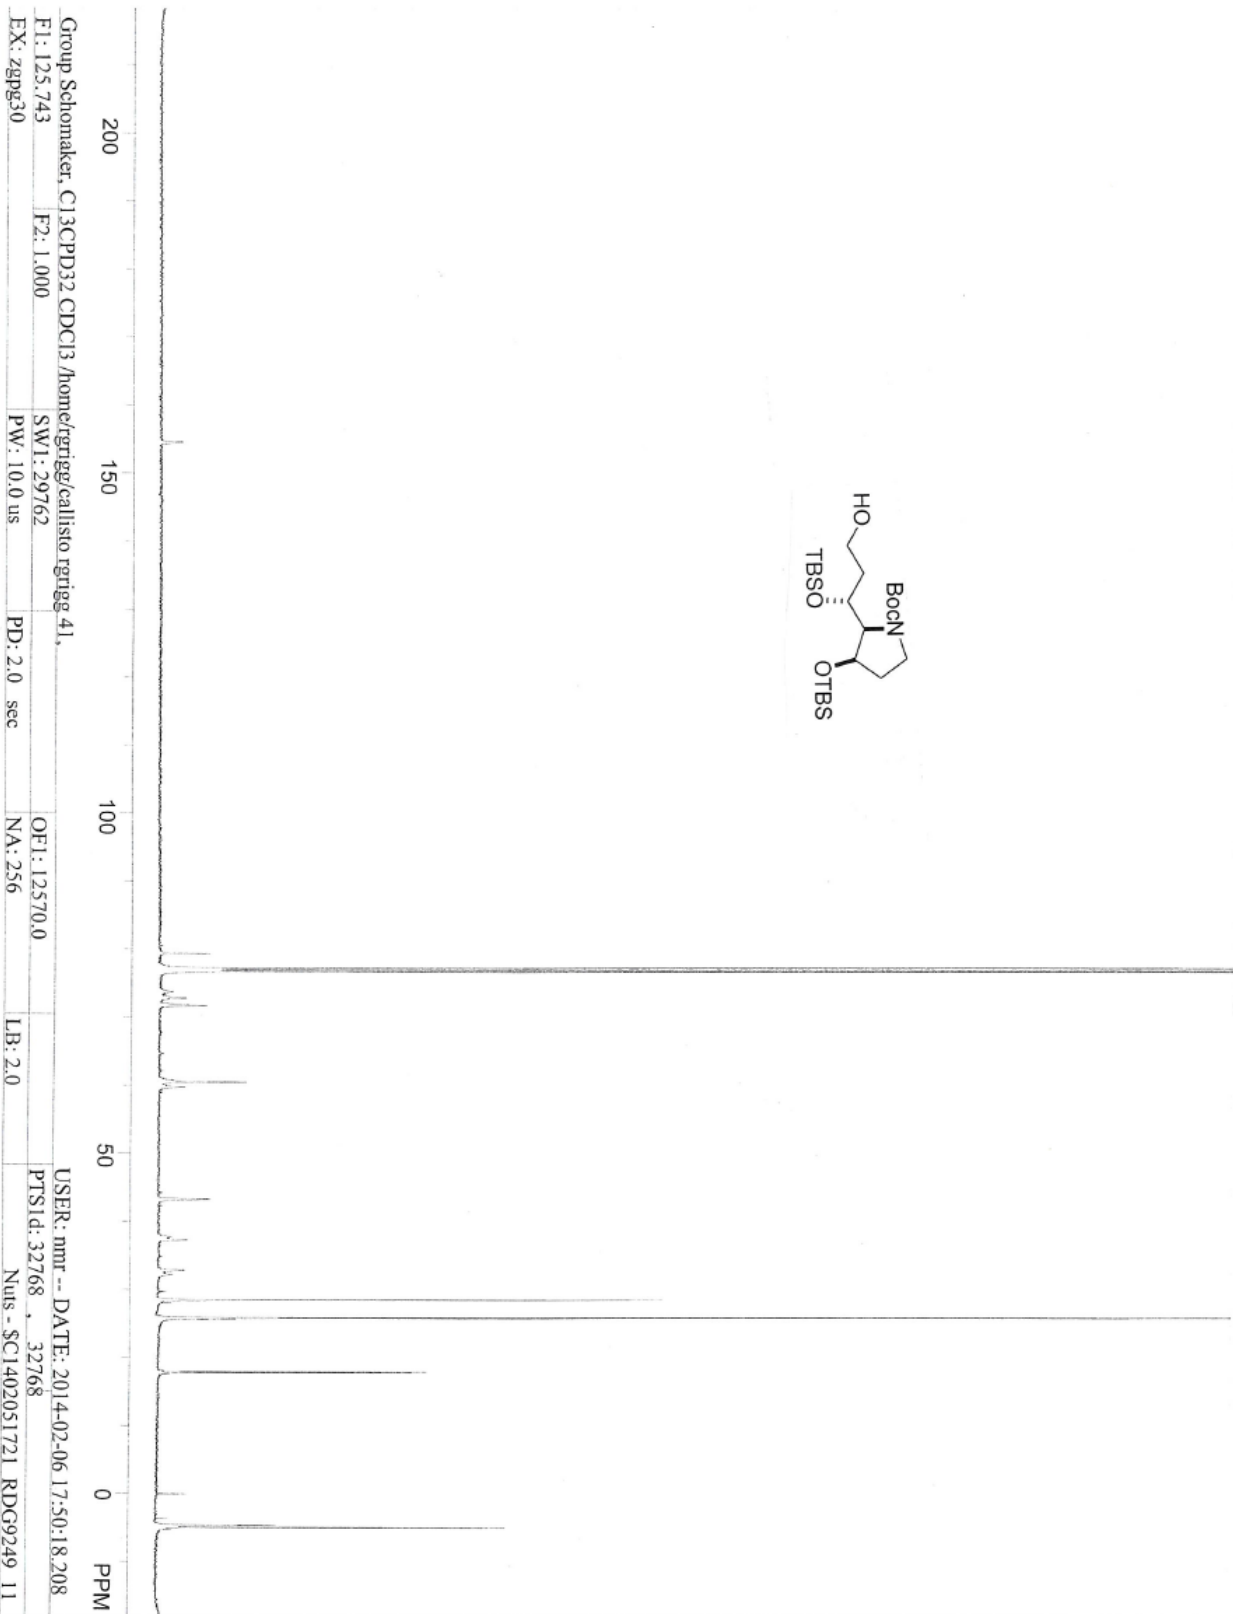

Group Schomaker, C13CPD32 CDC13 /home/rgrigg/callisto rgrigg 41,  
 FI: 125.743 F2: 1.000 SW1: 29762 OF1: 12570.0  
 EX: zdpE30 PW: 10.0 us PD: 2.0 sec NA: 256 LB: 2.0  
 USER: nmr -- DATE: 2014-02-06 17:50:18.208  
 PTSId: 32768 , 32768  
 Nuis - SC1402051721\_RDG9249\_11

**Compound 64c.**

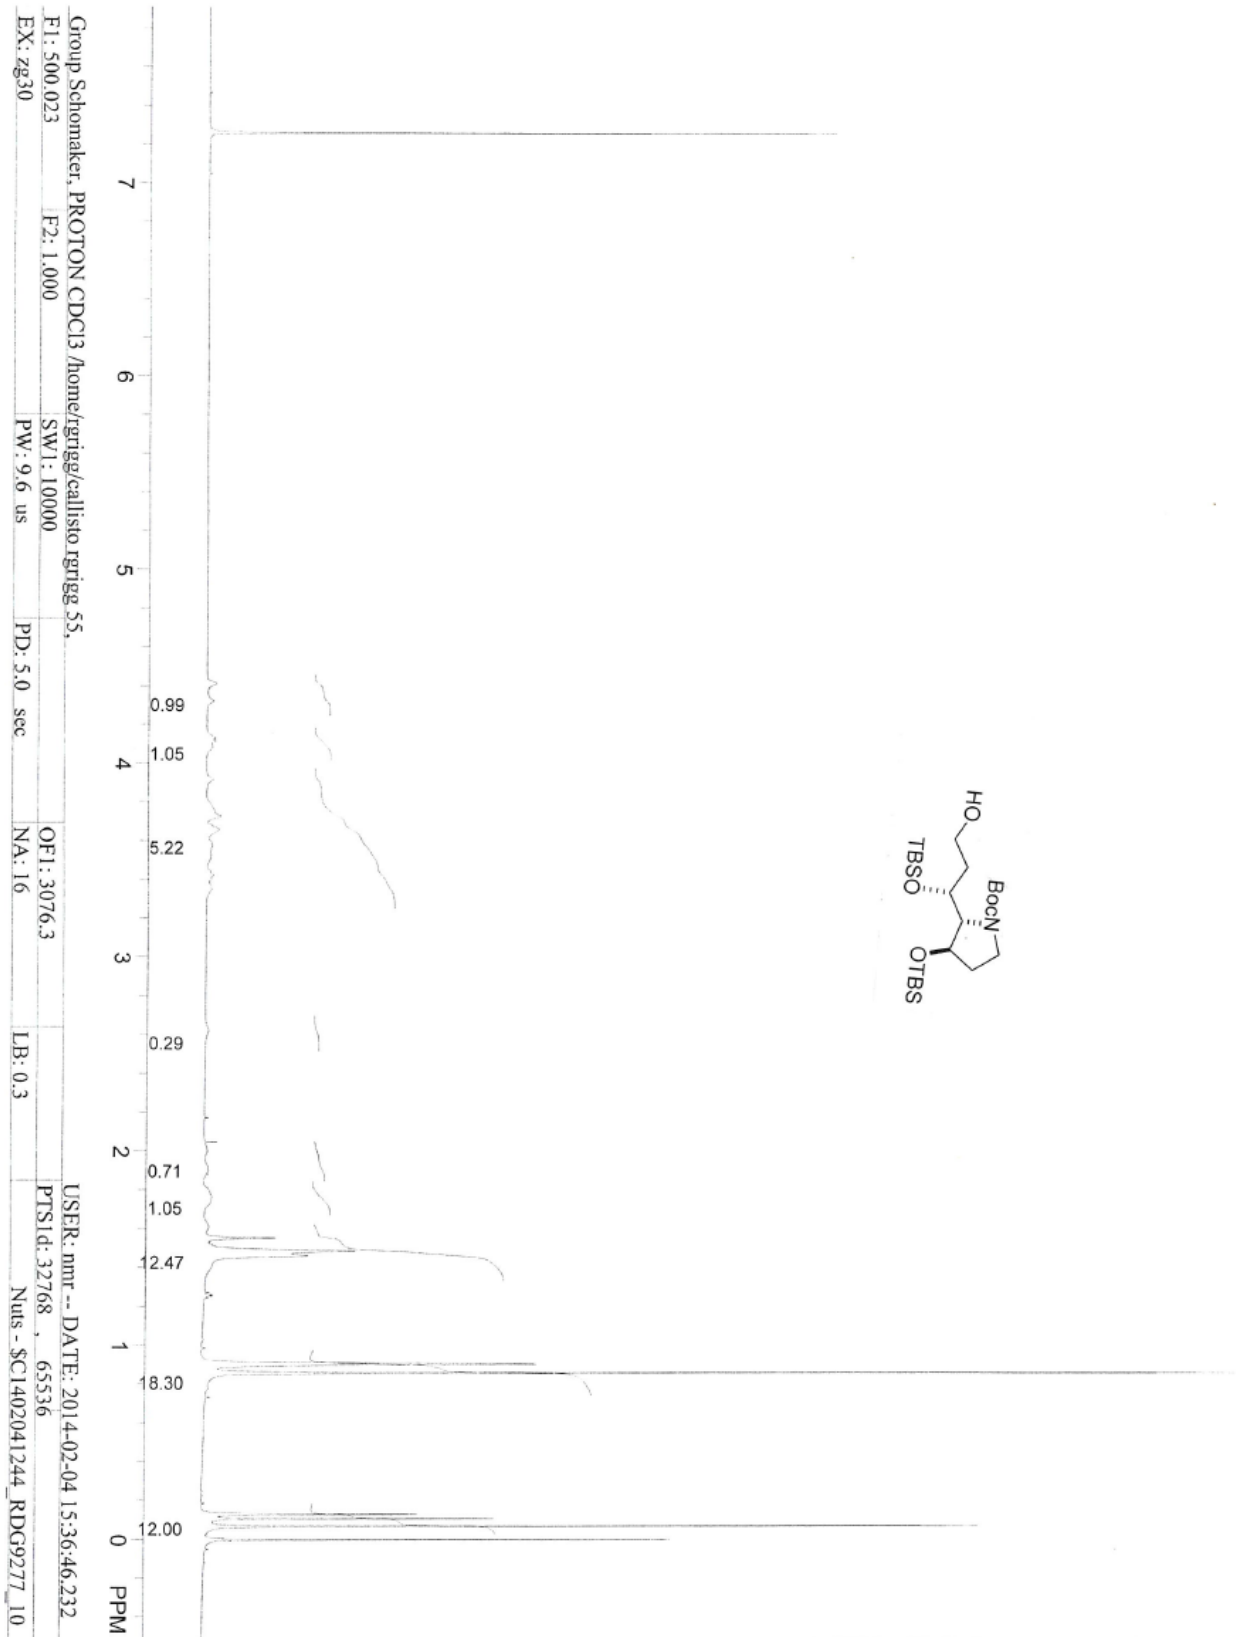

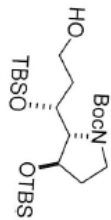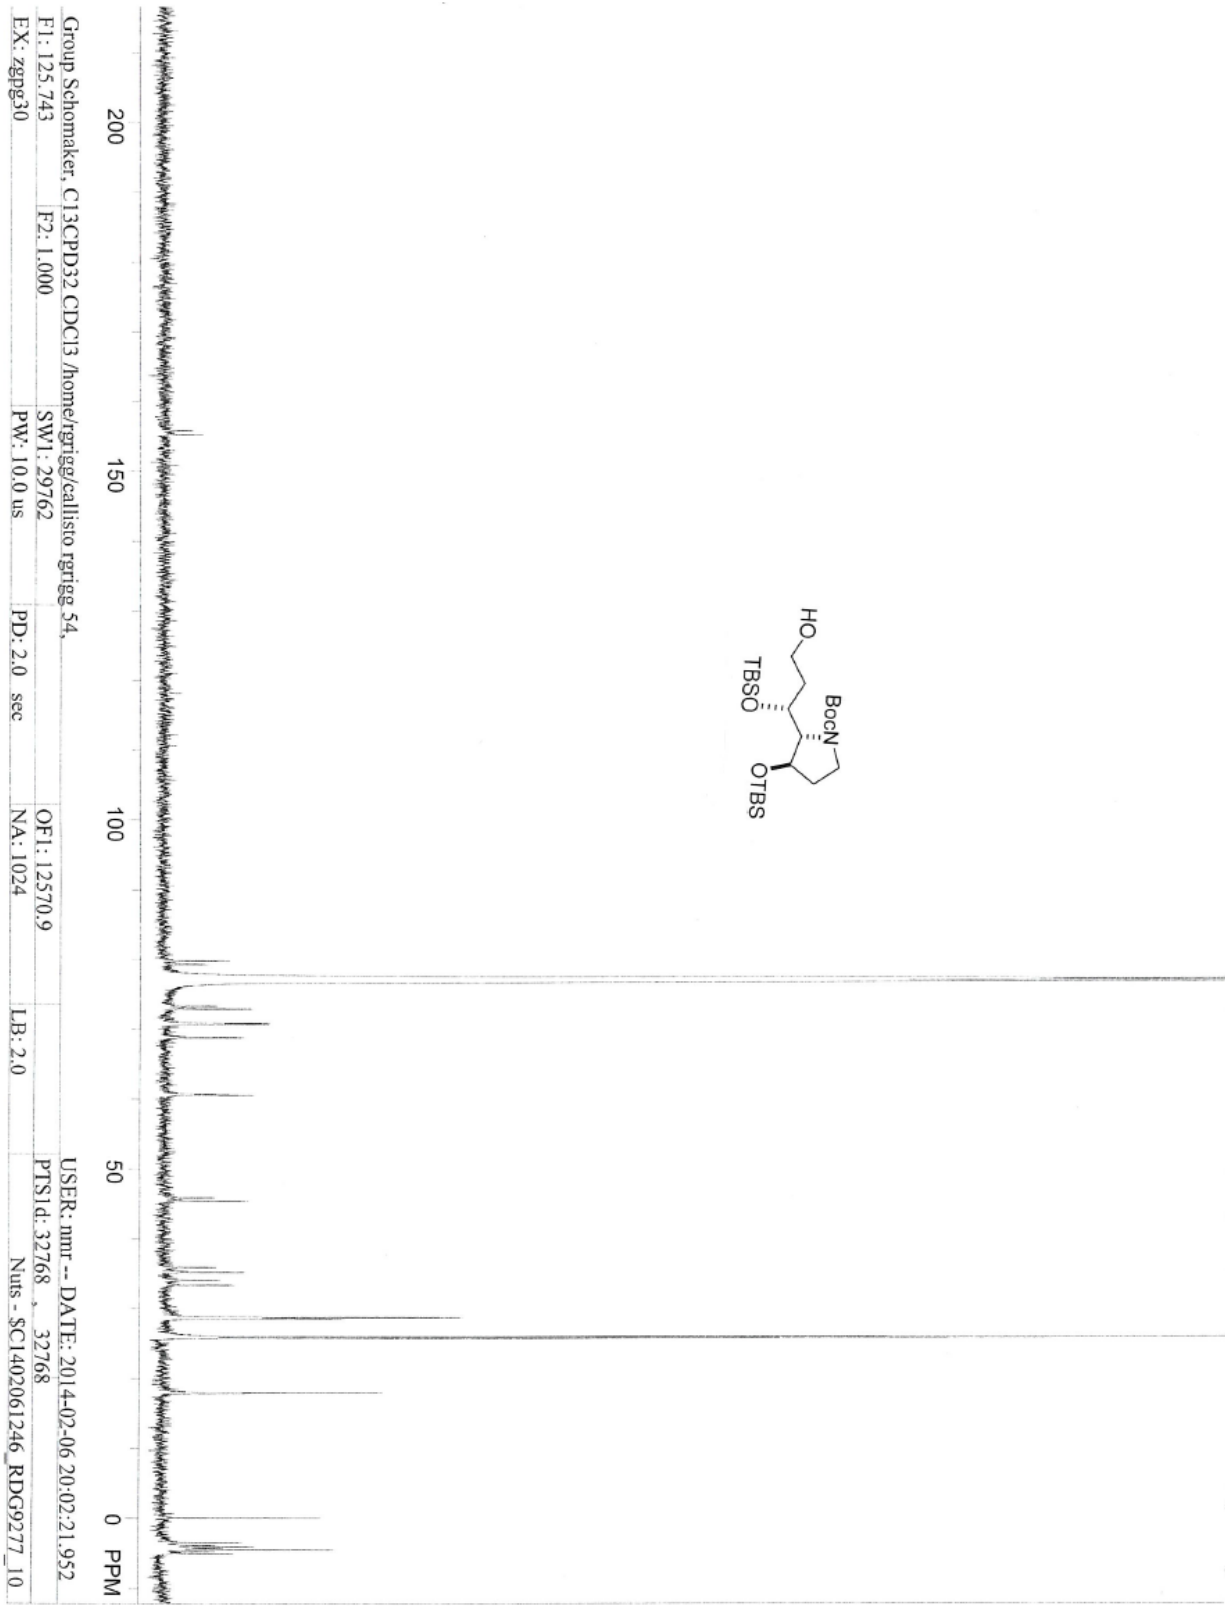

**Compound 66.**

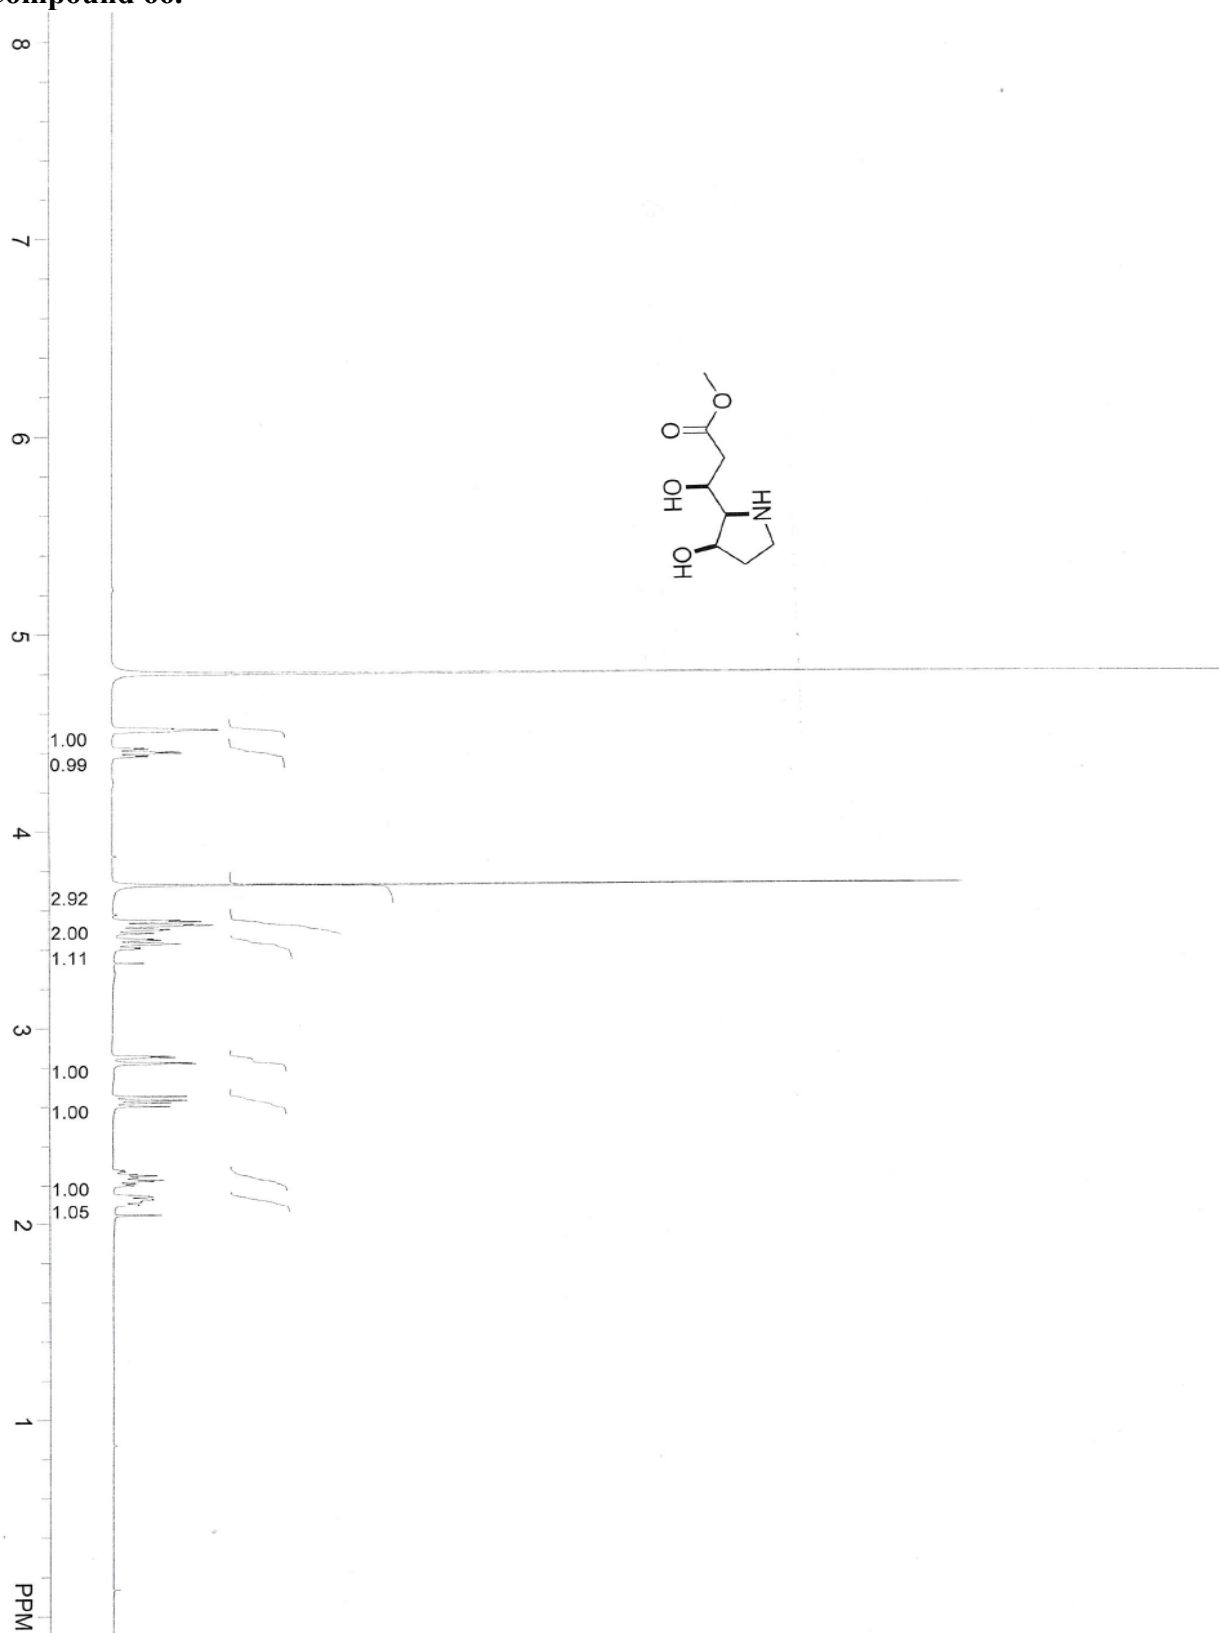



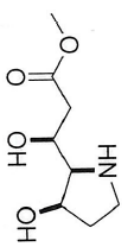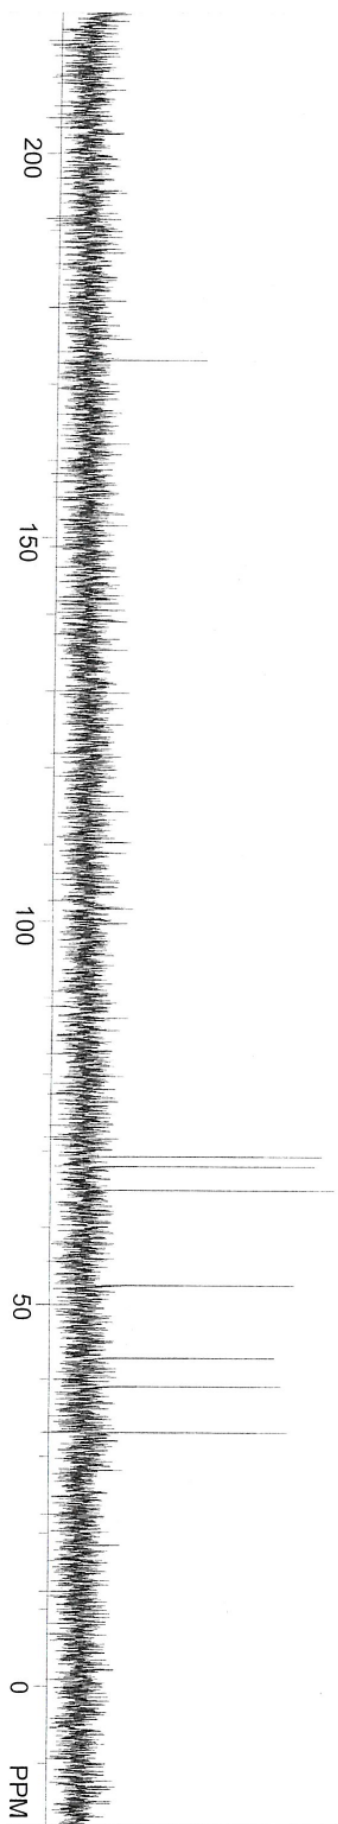

**Compound 67.**

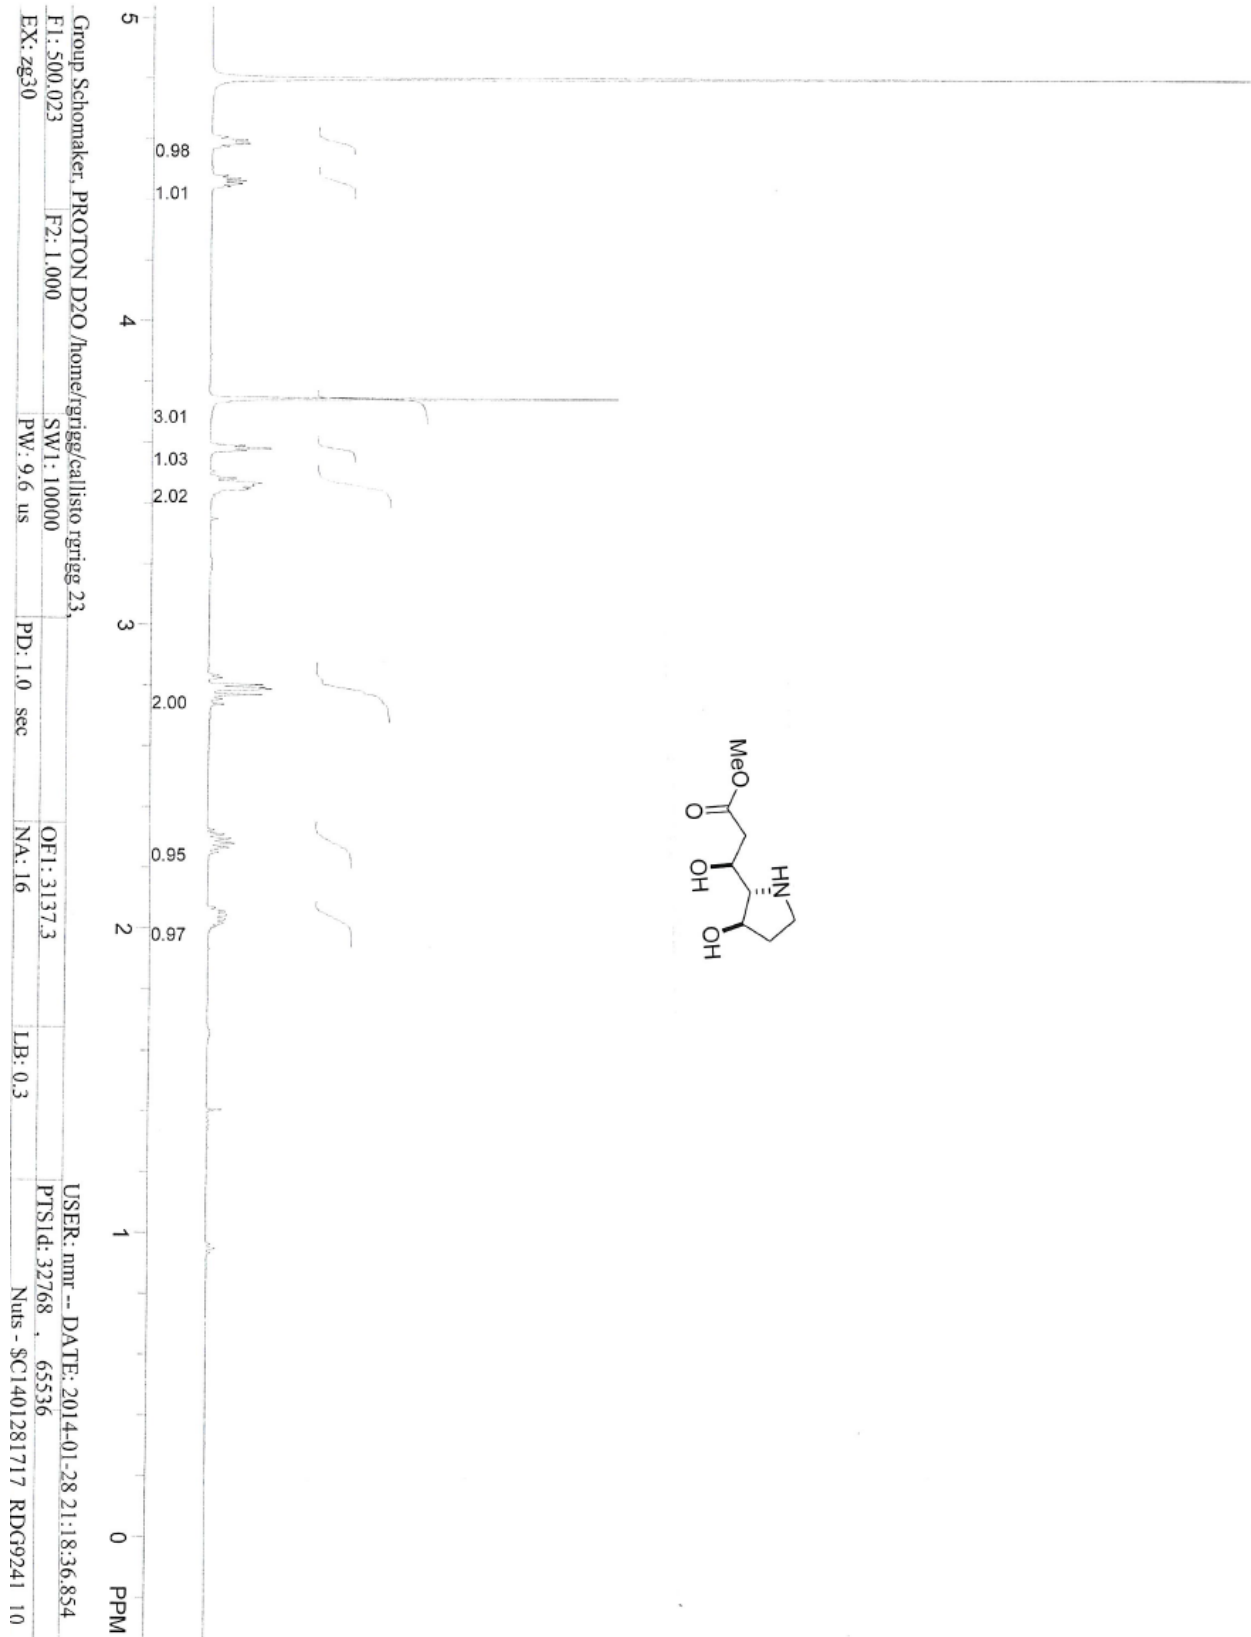

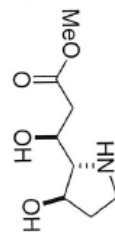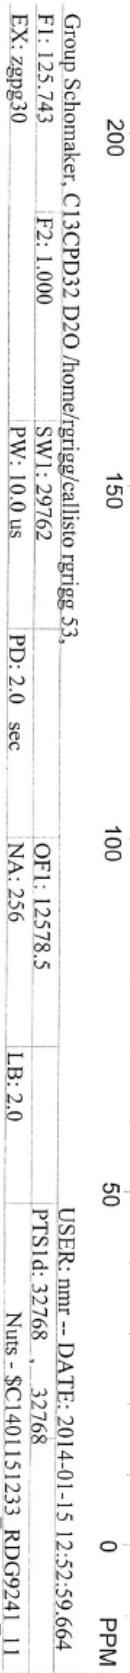

**Compound 68.**

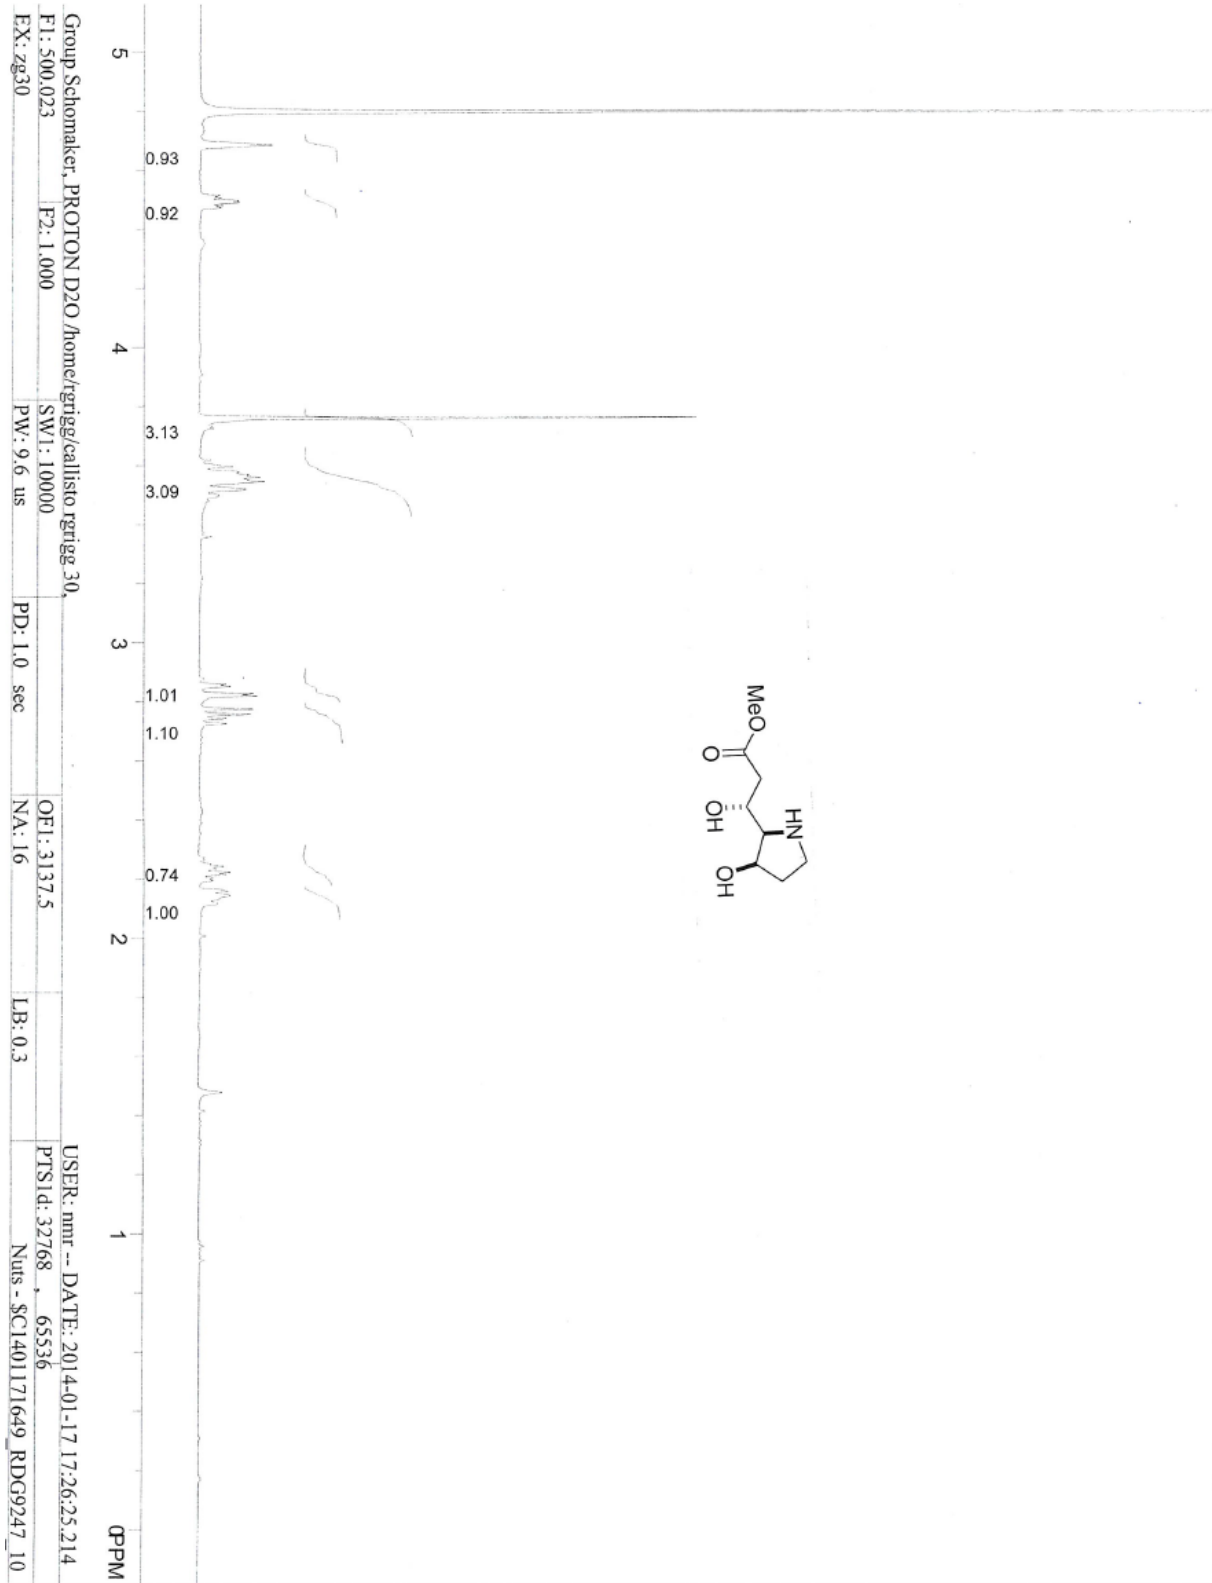

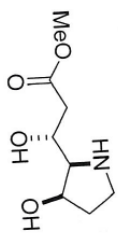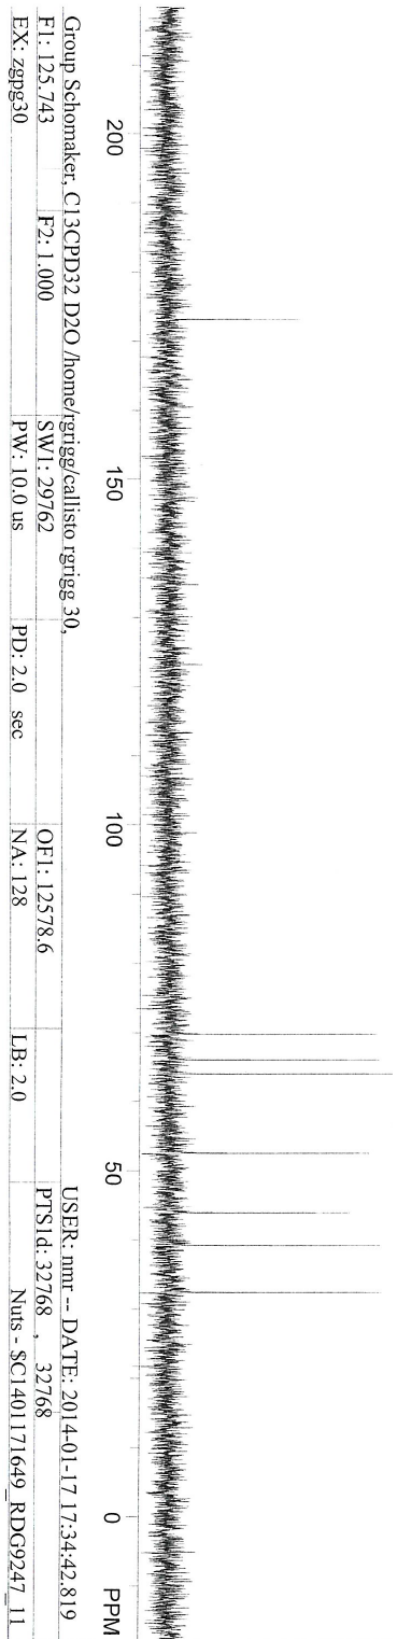

# Compound 69.

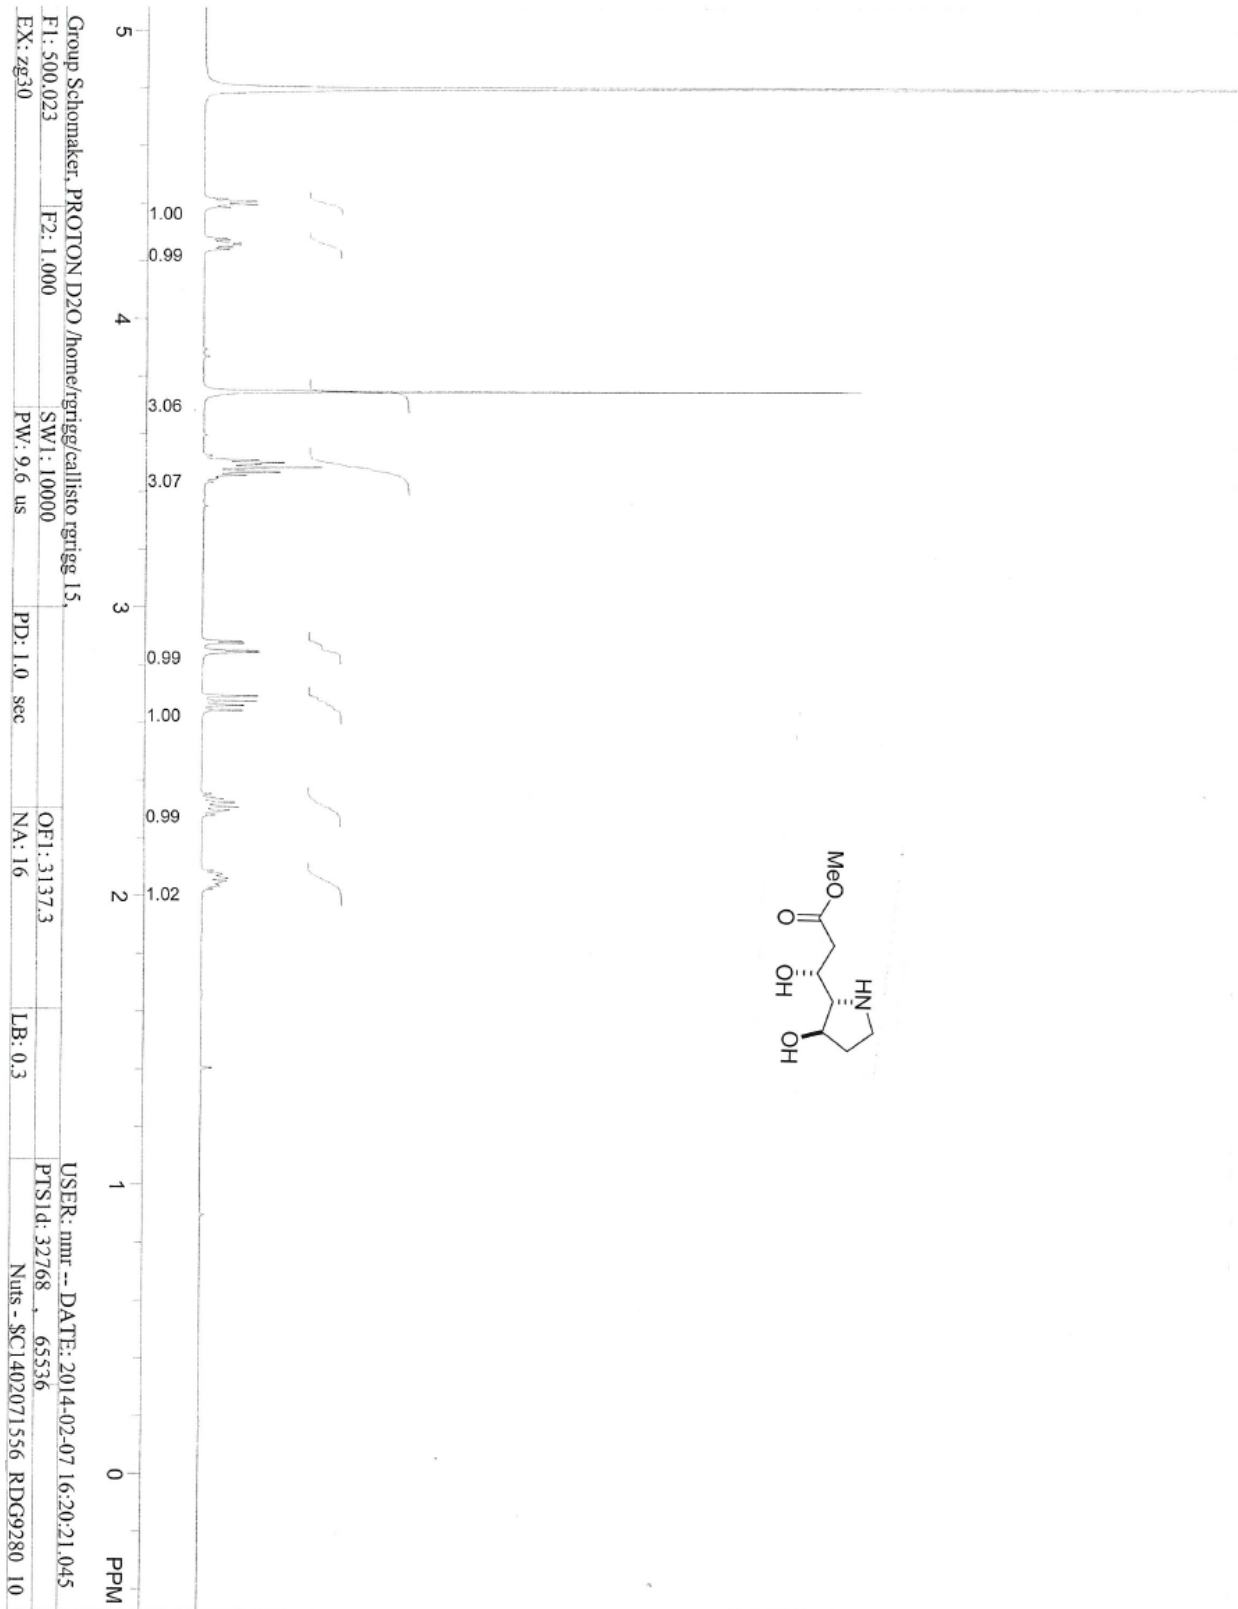

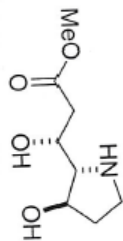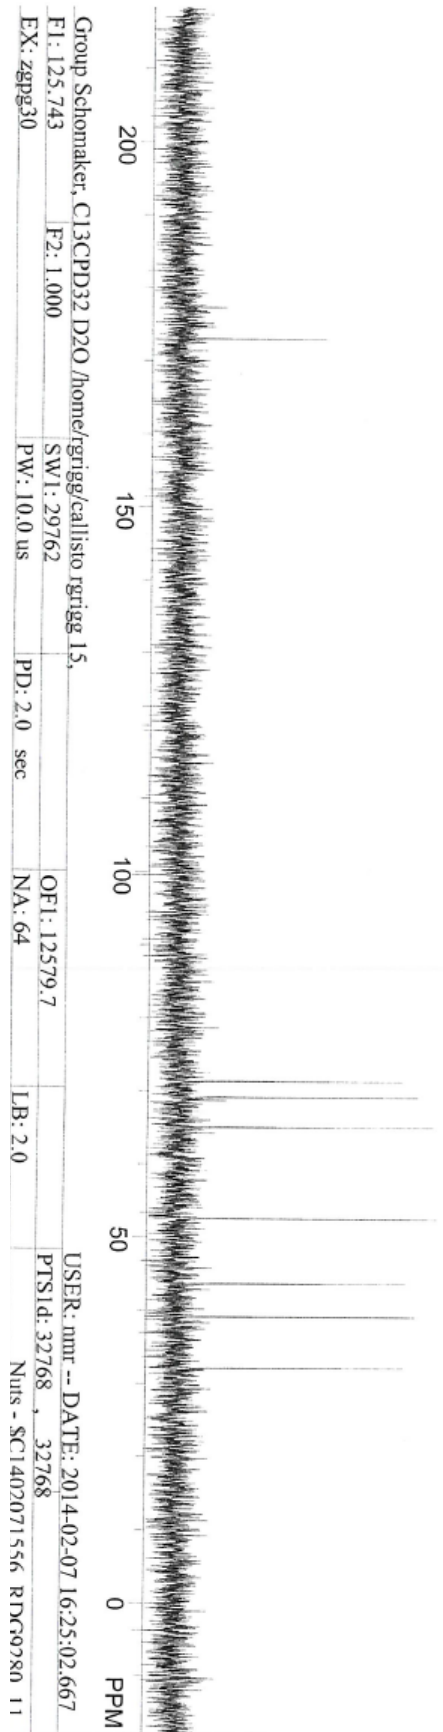

Group Schomaker: C13CPD32 D2O /home/rjrigg/callisto/rjrigg 15  
 FI: 125.743 F2: 1.000 SW1: 29762  
 EX: zgpg30 PW: 10.0 us PD: 2.0 sec OF1: 12579.7 NA: 64 LB: 2.0  
 USER: mmr -- DATE: 2014-02-07 16:25:02.667  
 PTSID: 32768 , 32768  
 Nuts - SCI1402071556 RDG09280 11
